# Supplementary material for: Quantitative Proteomics to Characterize Specific Histone H2A Proteolysis in Chronic Lymphocytic Leukemia and the Myeloid THP-1 Cell Line
Source: Int J Mol Sci. 2014 May 27;15(6):9407–21. doi: 10.3390/ijms15069407 (PMC4100102; doi:10.3390/ijms15069407)
Supplement: Supplementary File 1 — Supplementary Materials (ZIP, 1965 KB) [file ijms-15-09407-s001.zip]

Archive with 2 entries (2 files):
- ijms-50646-Figures S1-S3.pdf
- ijms-50646-Tables S1-S2.xls
