# Supplementary material for: Quantitative Proteomics to Characterize Specific Histone H2A Proteolysis in Chronic Lymphocytic Leukemia and the Myeloid THP-1 Cell Line
Source: Int J Mol Sci. 2014 May 27;15(6):9407–21. doi: 10.3390/ijms15069407 (PMC4100102; doi:10.3390/ijms15069407)
Supplement: Supplementary File 1 — Supplementary Materials (ZIP, 1965 KB) [file ijms-15-09407-s001.zip › ijms-50646-Tables S1-S2.xls]

## Sheet: Table S1a
Table S1a. Overview of all quantified proteins in the iTRAQ analysis
Protein ratios as given by an adapted reporter quantitation protocol of Mascot 2.3 (Matrix Science).
Proteins that are identified by only one peptide with a Mascot score above 45 that recur in at least 3 runs are considered to be proteotypic peptides and were thus included.
All ratios are normalized to summed intensities. Negative ratios indicate suspicious ratios.
U: unmutated ZAP70+ CLL B-cells; M: mutatated ZAP- CLL B-cells; H: Healthy 50+ B-cells.
iTRAQ run	U/M	M/H	H/U	prot_acc	protein name
2	0.654	0.544	2.707	1433B_HUMAN	14-3-3 protein beta/alpha (Protein kinase C inhibitor protein 1) (KCIP-1) (Protein 1054) - Homo sapiens (Human)
3	1.122	1.144	1.032	1433B_HUMAN	14-3-3 protein beta/alpha (Protein kinase C inhibitor protein 1) (KCIP-1) (Protein 1054) - Homo sapiens (Human)
4	1.133	1.138	0.735	1433B_HUMAN	14-3-3 protein beta/alpha (Protein kinase C inhibitor protein 1) (KCIP-1) (Protein 1054) - Homo sapiens (Human)
6	5.267	0.639	0.347	1433B_HUMAN	14-3-3 protein beta/alpha (Protein kinase C inhibitor protein 1) (KCIP-1) (Protein 1054) - Homo sapiens (Human)
2	0.872	0.767	1.438	1433E_HUMAN	14-3-3 protein epsilon (14-3-3E) - Homo sapiens (Human)
1	0.966	0.937	1.068	1433F_HUMAN	14-3-3 protein eta (Protein AS1) - Homo sapiens (Human)
2	0.839	0.691	1.658	1433T_HUMAN	14-3-3 protein theta (14-3-3 protein tau) (14-3-3 protein T-cell) (HS1 protein) - Homo sapiens (Human)
5	0.643	0.461	3.583	1433Z_HUMAN	14-3-3 protein zeta/delta (Protein kinase C inhibitor protein 1) (KCIP-1) - Homo sapiens (Human)
6	4.849	0.623	0.382	1433Z_HUMAN	14-3-3 protein zeta/delta (Protein kinase C inhibitor protein 1) (KCIP-1) - Homo sapiens (Human)
3	1.486	0.545	1.636	1A03_HUMAN	HLA class I histocompatibility antigen, A-3 alpha chain precursor (MHC class I antigen A*3) - Homo sapiens (Human)
3	1.875	0.478	1.48	1B07_HUMAN	HLA class I histocompatibility antigen, B-7 alpha chain precursor (MHC class I antigen B*7) - Homo sapiens (Human)
2	0.811	0.72	1.648	2AAA_HUMAN	Serine/threonine-protein phosphatase 2A 65 kDa regulatory subunit A alpha isoform (PP2A, subunit A, PR65-alpha isoform) (PP2A, subunit A, R1-alpha isoform) (Medium tumor antigen-associated 61 kDa protein) - Homo sapiens (Human)
5	2.862	0.729	0.509	2B11_HUMAN	HLA class II histocompatibility antigen, DRB1-1 beta chain precursor (MHC class I antigen DRB1*1) (DR-1) (DR1) - Homo sapiens (Human)
6	0.307	2.933	1.077	2B1B_HUMAN	HLA class II histocompatibility antigen, DRB1-11 beta chain precursor (MHC class I antigen DRB1*11) (DR-5) (DR5) (DRw11) - Homo sapiens (Human)
5	1.842	1.369	0.422	2DRA_HUMAN	HLA class II histocompatibility antigen, DR alpha chain precursor (MHC class II antigen DRA) - Homo sapiens (Human)
2	1.116	0.837	1.03	3HIDH_HUMAN	3-hydroxyisobutyrate dehydrogenase, mitochondrial precursor (EC 1.1.1.31) (HIBADH) - Homo sapiens (Human)
6	1.484	0.924	0.708	3HIDH_HUMAN	3-hydroxyisobutyrate dehydrogenase, mitochondrial precursor (EC 1.1.1.31) (HIBADH) - Homo sapiens (Human)
5	1.37	0.961	0.808	AATM_HUMAN	Aspartate aminotransferase, mitochondrial precursor (EC 2.6.1.1) (Transaminase A) (Glutamate oxaloacetate transaminase 2) - Homo sapiens (Human)
6	1.264	0.848	0.905	AATM_HUMAN	Aspartate aminotransferase, mitochondrial precursor (EC 2.6.1.1) (Transaminase A) (Glutamate oxaloacetate transaminase 2) - Homo sapiens (Human)
2	1.005	1.113	0.86	ACADM_HUMAN	Medium-chain specific acyl-CoA dehydrogenase, mitochondrial precursor (EC 1.3.99.3) (MCAD) - Homo sapiens (Human)
4	0.75	3.002	0.421	ACADM_HUMAN	Medium-chain specific acyl-CoA dehydrogenase, mitochondrial precursor (EC 1.3.99.3) (MCAD) - Homo sapiens (Human)
5	2.542	0.811	0.516	ACADM_HUMAN	Medium-chain specific acyl-CoA dehydrogenase, mitochondrial precursor (EC 1.3.99.3) (MCAD) - Homo sapiens (Human)
6	1.064	1.412	0.642	ACADM_HUMAN	Medium-chain specific acyl-CoA dehydrogenase, mitochondrial precursor (EC 1.3.99.3) (MCAD) - Homo sapiens (Human)
1	0.6	2.589	0.622	ACBP_HUMAN	Acyl-CoA-binding protein (ACBP) (Diazepam-binding inhibitor) (DBI) (Endozepine) (EP) - Homo sapiens (Human)
3	−0.107	1.376	−8.967	ACINU_HUMAN	Apoptotic chromatin condensation inducer in the nucleus (Acinus) - Homo sapiens (Human)
2	0.903	0.948	1.124	ACLY_HUMAN	ATP-citrate synthase (EC 2.3.3.8) (ATP-citrate (pro-S-)-lyase) (Citrate cleavage enzyme) - Homo sapiens (Human)
5	1.24	0.671	1.278	ACLY_HUMAN	ATP-citrate synthase (EC 2.3.3.8) (ATP-citrate (pro-S-)-lyase) (Citrate cleavage enzyme) - Homo sapiens (Human)
6	1.39	−7.033	−0.099	ACLY_HUMAN	ATP-citrate synthase (EC 2.3.3.8) (ATP-citrate (pro-S-)-lyase) (Citrate cleavage enzyme) - Homo sapiens (Human)
1	0.815	0.725	1.635	ACTA_HUMAN	Actin, aortic smooth muscle (Alpha-actin-2) - Homo sapiens (Human)
6	3.074	0.25	1.388	ACTA_HUMAN	Actin, aortic smooth muscle (Alpha-actin-2) - Homo sapiens (Human)
1	0.861	0.716	1.567	ACTB_HUMAN	Actin, cytoplasmic 1 (Beta-actin) - Homo sapiens (Human)
2	0.896	0.693	1.567	ACTB_HUMAN	Actin, cytoplasmic 1 (Beta-actin) - Homo sapiens (Human)
3	0.866	0.764	2.003	ACTB_HUMAN	Actin, cytoplasmic 1 (Beta-actin) - Homo sapiens (Human)
4	0.94	1.166	0.865	ACTB_HUMAN	Actin, cytoplasmic 1 (Beta-actin) - Homo sapiens (Human)
5	0.739	0.46	3.131	ACTB_HUMAN	Actin, cytoplasmic 1 (Beta-actin) - Homo sapiens (Human)
6	2.91	0.261	1.424	ACTB_HUMAN	Actin, cytoplasmic 1 (Beta-actin) - Homo sapiens (Human)
2	0.895	0.695	1.561	ACTG_HUMAN	Actin, cytoplasmic 2 (Gamma-actin) - Homo sapiens (Human)
3	0.886	0.766	1.951	ACTG_HUMAN	Actin, cytoplasmic 2 (Gamma-actin) - Homo sapiens (Human)
5	0.744	0.458	3.122	ACTG_HUMAN	Actin, cytoplasmic 2 (Gamma-actin) - Homo sapiens (Human)
6	2.915	0.26	1.427	ACTG_HUMAN	Actin, cytoplasmic 2 (Gamma-actin) - Homo sapiens (Human)
2	0.821	0.116	10.096	ACTN1_HUMAN	Alpha-actinin-1 (Alpha-actinin cytoskeletal isoform) (Non-muscle alpha-actinin-1) (F-actin cross-linking protein) - Homo sapiens (Human)
1	0.944	0.442	2.316	ACTN4_HUMAN	Alpha-actinin-4 (Non-muscle alpha-actinin 4) (F-actin cross-linking protein) - Homo sapiens (Human)
2	0.929	0.696	1.489	ACTN4_HUMAN	Alpha-actinin-4 (Non-muscle alpha-actinin 4) (F-actin cross-linking protein) - Homo sapiens (Human)
5	0.772	0.788	1.747	ACTN4_HUMAN	Alpha-actinin-4 (Non-muscle alpha-actinin 4) (F-actin cross-linking protein) - Homo sapiens (Human)
6	3.351	0.447	0.648	ACTN4_HUMAN	Alpha-actinin-4 (Non-muscle alpha-actinin 4) (F-actin cross-linking protein) - Homo sapiens (Human)
6	1.612	0.468	1.285	ADHX_HUMAN	Alcohol dehydrogenase class 3 chi chain (EC 1.1.1.1) (Alcohol dehydrogenase class III chi chain) (S-(hydroxymethyl)glutathione dehydrogenase) (EC 1.1.1.284) (Glutathione-dependent formaldehyde dehydrogenase) (FDH) - Homo sapiens (Human)
2	0.802	1.361	0.881	ADRO_HUMAN	NADPH:adrenodoxin oxidoreductase, mitochondrial precursor (EC 1.18.1.2) (Adrenodoxin reductase) (AR) (Ferredoxin reductase) (Ferredoxin--NADP(+) reductase) - Homo sapiens (Human)
5	2.835	0.676	0.555	ADT1_HUMAN	ADP/ATP translocase 1 (Adenine nucleotide translocator 1) (ANT 1) (ADP,ATP carrier protein 1) (Solute carrier family 25 member 4) (ADP,ATP carrier protein, heart/skeletal muscle isoform T1) - Homo sapiens (Human)
2	0.904	0.621	1.714	AGK_HUMAN	Acylglycerol kinase, mitochondrial precursor (EC 2.7.1.94) (EC 2.7.1.107) (hAGK) (Multiple substrate lipid kinase) (Multi-substrate lipid kinase) (MuLK) (HsMuLK) - Homo sapiens (Human)
1	1.234	1.551	0.497	AHNK_HUMAN	Neuroblast differentiation-associated protein AHNAK (Desmoyokin) (Fragments) - Homo sapiens (Human)
2	1.756	0.953	0.575	AHNK_HUMAN	Neuroblast differentiation-associated protein AHNAK (Desmoyokin) (Fragments) - Homo sapiens (Human)
3	2.128	1.06	0.587	AHNK_HUMAN	Neuroblast differentiation-associated protein AHNAK (Desmoyokin) (Fragments) - Homo sapiens (Human)
5	1.594	2.069	0.322	AHNK_HUMAN	Neuroblast differentiation-associated protein AHNAK (Desmoyokin) (Fragments) - Homo sapiens (Human)
6	0.219	4.127	1.075	AHNK_HUMAN	Neuroblast differentiation-associated protein AHNAK (Desmoyokin) (Fragments) - Homo sapiens (Human)
5	0.802	4.658	0.285	AIF1_HUMAN	Allograft inflammatory factor 1 (AIF-1) (Ionized calcium-binding adapter molecule 1) (Protein G1) - Homo sapiens (Human)
1	1.203	0.809	0.992	ALBU_HUMAN	Serum albumin precursor - Homo sapiens (Human)
2	0.666	1.106	1.307	ALBU_HUMAN	Serum albumin precursor - Homo sapiens (Human)
3	0.942	1.961	0.717	ALBU_HUMAN	Serum albumin precursor - Homo sapiens (Human)
4	0.708	1.718	0.781	ALBU_HUMAN	Serum albumin precursor - Homo sapiens (Human)
5	0.61	2.64	0.659	ALBU_HUMAN	Serum albumin precursor - Homo sapiens (Human)
6	0.842	7.488	0.153	ALBU_HUMAN	Serum albumin precursor - Homo sapiens (Human)
1	1.068	1.01	0.896	ALDOA_HUMAN	Fructose-bisphosphate aldolase A (EC 4.1.2.13) (Muscle-type aldolase) (Lung cancer antigen NY-LU-1) - Homo sapiens (Human)
2	0.915	1.177	0.893	ALDOA_HUMAN	Fructose-bisphosphate aldolase A (EC 4.1.2.13) (Muscle-type aldolase) (Lung cancer antigen NY-LU-1) - Homo sapiens (Human)
3	2.196	1.915	0.315	ALDOA_HUMAN	Fructose-bisphosphate aldolase A (EC 4.1.2.13) (Muscle-type aldolase) (Lung cancer antigen NY-LU-1) - Homo sapiens (Human)
4	0.972	0.985	0.99	ALDOA_HUMAN	Fructose-bisphosphate aldolase A (EC 4.1.2.13) (Muscle-type aldolase) (Lung cancer antigen NY-LU-1) - Homo sapiens (Human)
6	3.032	0.525	0.756	ALDOA_HUMAN	Fructose-bisphosphate aldolase A (EC 4.1.2.13) (Muscle-type aldolase) (Lung cancer antigen NY-LU-1) - Homo sapiens (Human)
5	0.808	1.087	1.211	ALDOC_HUMAN	Fructose-bisphosphate aldolase C (EC 4.1.2.13) (Brain-type aldolase) - Homo sapiens (Human)
1	0.742	1.119	1.163	AN32A_HUMAN	Acidic leucine-rich nuclear phosphoprotein 32 family member A (Potent heat-stable protein phosphatase 2A inhibitor I1PP2A) (Acidic nuclear phosphoprotein pp32) (Leucine-rich acidic nuclear protein) (Lanp) (Putative HLA-DR-associated protein I) (PHAP
2	1.303	0.805	0.917	AN32A_HUMAN	Acidic leucine-rich nuclear phosphoprotein 32 family member A (Potent heat-stable protein phosphatase 2A inhibitor I1PP2A) (Acidic nuclear phosphoprotein pp32) (Leucine-rich acidic nuclear protein) (Lanp) (Putative HLA-DR-associated protein I) (PHAP
3	0.735	1.526	1.181	AN32A_HUMAN	Acidic leucine-rich nuclear phosphoprotein 32 family member A (Potent heat-stable protein phosphatase 2A inhibitor I1PP2A) (Acidic nuclear phosphoprotein pp32) (Leucine-rich acidic nuclear protein) (Lanp) (Putative HLA-DR-associated protein I) (PHAP
6	1.092	0.7	1.271	AN32A_HUMAN	Acidic leucine-rich nuclear phosphoprotein 32 family member A (Potent heat-stable protein phosphatase 2A inhibitor I1PP2A) (Acidic nuclear phosphoprotein pp32) (Leucine-rich acidic nuclear protein) (Lanp) (Putative HLA-DR-associated protein I) (PHAP
2	1.511	1.066	0.597	AN32B_HUMAN	Acidic leucine-rich nuclear phosphoprotein 32 family member B (PHAPI2 protein) (Silver-stainable protein SSP29) (Acidic protein rich in leucines) - Homo sapiens (Human)
3	1.502	1.189	0.741	ANX11_HUMAN	Annexin A11 (Annexin XI) (Calcyclin-associated annexin 50) (CAP-50) (56 kDa autoantigen) - Homo sapiens (Human)
2	1.121	1.206	0.711	ANXA2_HUMAN	Annexin A2 (Annexin II) (Lipocortin II) (Calpactin I heavy chain) (Chromobindin-8) (p36) (Protein I) (Placental anticoagulant protein IV) (PAP-IV) - Homo sapiens (Human)
5	0.745	1.286	1.11	ANXA2_HUMAN	Annexin A2 (Annexin II) (Lipocortin II) (Calpactin I heavy chain) (Chromobindin-8) (p36) (Protein I) (Placental anticoagulant protein IV) (PAP-IV) - Homo sapiens (Human)
6	0.769	2.128	0.593	ANXA2_HUMAN	Annexin A2 (Annexin II) (Lipocortin II) (Calpactin I heavy chain) (Chromobindin-8) (p36) (Protein I) (Placental anticoagulant protein IV) (PAP-IV) - Homo sapiens (Human)
1	0.935	2.453	0.421	ANXA5_HUMAN	Annexin A5 (Annexin V) (Lipocortin V) (Endonexin II) (Calphobindin I) (CBP-I) (Placental anticoagulant protein I) (PAP-I) (PP4) (Thromboplastin inhibitor) (Vascular anticoagulant-alpha) (VAC-alpha) (Anchorin CII) - Homo sapiens (Human)
2	1.384	1.243	0.559	ANXA5_HUMAN	Annexin A5 (Annexin V) (Lipocortin V) (Endonexin II) (Calphobindin I) (CBP-I) (Placental anticoagulant protein I) (PAP-I) (PP4) (Thromboplastin inhibitor) (Vascular anticoagulant-alpha) (VAC-alpha) (Anchorin CII) - Homo sapiens (Human)
3	1.123	1.546	0.763	ANXA5_HUMAN	Annexin A5 (Annexin V) (Lipocortin V) (Endonexin II) (Calphobindin I) (CBP-I) (Placental anticoagulant protein I) (PAP-I) (PP4) (Thromboplastin inhibitor) (Vascular anticoagulant-alpha) (VAC-alpha) (Anchorin CII) - Homo sapiens (Human)
5	1.331	1.004	0.795	ANXA5_HUMAN	Annexin A5 (Annexin V) (Lipocortin V) (Endonexin II) (Calphobindin I) (CBP-I) (Placental anticoagulant protein I) (PAP-I) (PP4) (Thromboplastin inhibitor) (Vascular anticoagulant-alpha) (VAC-alpha) (Anchorin CII) - Homo sapiens (Human)
6	0.486	2.464	0.81	ANXA5_HUMAN	Annexin A5 (Annexin V) (Lipocortin V) (Endonexin II) (Calphobindin I) (CBP-I) (Placental anticoagulant protein I) (PAP-I) (PP4) (Thromboplastin inhibitor) (Vascular anticoagulant-alpha) (VAC-alpha) (Anchorin CII) - Homo sapiens (Human)
1	0.991	0.856	1.139	ANXA6_HUMAN	Annexin A6 (Annexin VI) (Lipocortin VI) (P68) (P70) (Protein III) (Chromobindin-20) (67 kDa calelectrin) (Calphobindin-II) (CPB-II) - Homo sapiens (Human)
2	1.568	1.028	0.597	ANXA6_HUMAN	Annexin A6 (Annexin VI) (Lipocortin VI) (P68) (P70) (Protein III) (Chromobindin-20) (67 kDa calelectrin) (Calphobindin-II) (CPB-II) - Homo sapiens (Human)
3	1.719	1.505	0.512	ANXA6_HUMAN	Annexin A6 (Annexin VI) (Lipocortin VI) (P68) (P70) (Protein III) (Chromobindin-20) (67 kDa calelectrin) (Calphobindin-II) (CPB-II) - Homo sapiens (Human)
5	0.464	−11.744	−0.195	ANXA6_HUMAN	Annexin A6 (Annexin VI) (Lipocortin VI) (P68) (P70) (Protein III) (Chromobindin-20) (67 kDa calelectrin) (Calphobindin-II) (CPB-II) - Homo sapiens (Human)
6	0.583	0.807	2.062	ANXA6_HUMAN	Annexin A6 (Annexin VI) (Lipocortin VI) (P68) (P70) (Protein III) (Chromobindin-20) (67 kDa calelectrin) (Calphobindin-II) (CPB-II) - Homo sapiens (Human)
1	1.114	1.261	0.688	APEX1_HUMAN	DNA-(apurinic or apyrimidinic site) lyase (EC 4.2.99.18) (AP endonuclease 1) (APEX nuclease) (APEN) (REF-1 protein) - Homo sapiens (Human)
2	0.998	1.173	0.821	APEX1_HUMAN	DNA-(apurinic or apyrimidinic site) lyase (EC 4.2.99.18) (AP endonuclease 1) (APEX nuclease) (APEN) (REF-1 protein) - Homo sapiens (Human)
3	0.835	0.955	1.66	APEX1_HUMAN	DNA-(apurinic or apyrimidinic site) lyase (EC 4.2.99.18) (AP endonuclease 1) (APEX nuclease) (APEN) (REF-1 protein) - Homo sapiens (Human)
5	1.466	0.807	0.899	APEX1_HUMAN	DNA-(apurinic or apyrimidinic site) lyase (EC 4.2.99.18) (AP endonuclease 1) (APEX nuclease) (APEN) (REF-1 protein) - Homo sapiens (Human)
6	0.944	0.48	2.143	APEX1_HUMAN	DNA-(apurinic or apyrimidinic site) lyase (EC 4.2.99.18) (AP endonuclease 1) (APEX nuclease) (APEN) (REF-1 protein) - Homo sapiens (Human)
6	0.442	1.237	1.774	API5_HUMAN	Apoptosis inhibitor 5 (API-5) (Fibroblast growth factor 2-interacting factor) (FIF) (Protein XAGL) (Antiapoptosis clone 11 protein) (AAC-11) - Homo sapiens (Human)
1	2.67	0.512	0.707	APT_HUMAN	Adenine phosphoribosyltransferase (EC 2.4.2.7) (APRT) - Homo sapiens (Human)
2	1.411	0.522	1.307	APT_HUMAN	Adenine phosphoribosyltransferase (EC 2.4.2.7) (APRT) - Homo sapiens (Human)
2	0.903	0.994	1.072	ARHG7_HUMAN	Rho guanine nucleotide exchange factor 7 (PAK-interacting exchange factor beta) (Beta-Pix) (COOL-1) (p85) - Homo sapiens (Human)
1	0.974	1.23	0.806	ARP3_HUMAN	Actin-like protein 3 (Actin-related protein 3) - Homo sapiens (Human)
2	0.748	1.304	0.986	ARP3_HUMAN	Actin-like protein 3 (Actin-related protein 3) - Homo sapiens (Human)
5	0.74	1.108	1.297	ARP3_HUMAN	Actin-like protein 3 (Actin-related protein 3) - Homo sapiens (Human)
6	1.126	0.762	1.131	ARP3_HUMAN	Actin-like protein 3 (Actin-related protein 3) - Homo sapiens (Human)
6	0.984	0.733	1.345	ARPC3_HUMAN	Actin-related protein 2/3 complex subunit 3 (ARP2/3 complex 21 kDa subunit) (p21-ARC) - Homo sapiens (Human)
1	0.81	0.899	1.328	ARPC4_HUMAN	Actin-related protein 2/3 complex subunit 4 (ARP2/3 complex 20 kDa subunit) (p20-ARC) - Homo sapiens (Human)
1	0.742	0.99	1.315	ARPC5_HUMAN	Actin-related protein 2/3 complex subunit 5 (ARP2/3 complex 16 kDa subunit) (p16-ARC) - Homo sapiens (Human)
2	0.604	0.48	3.318	ARPC5_HUMAN	Actin-related protein 2/3 complex subunit 5 (ARP2/3 complex 16 kDa subunit) (p16-ARC) - Homo sapiens (Human)
3	0.838	0.898	1.76	ARPC5_HUMAN	Actin-related protein 2/3 complex subunit 5 (ARP2/3 complex 16 kDa subunit) (p16-ARC) - Homo sapiens (Human)
5	0.791	1.244	1.08	ARPC5_HUMAN	Actin-related protein 2/3 complex subunit 5 (ARP2/3 complex 16 kDa subunit) (p16-ARC) - Homo sapiens (Human)
6	1.238	0.609	1.288	ARPC5_HUMAN	Actin-related protein 2/3 complex subunit 5 (ARP2/3 complex 16 kDa subunit) (p16-ARC) - Homo sapiens (Human)
3	1.715	1.329	0.581	ARS2_HUMAN	Arsenite-resistance protein 2 - Homo sapiens (Human)
6	0.527	1.365	1.349	ASPM_HUMAN	Abnormal spindle-like microcephaly-associated protein (Abnormal spindle protein homolog) (Asp homolog) - Homo sapiens (Human)
3	1.13	1.128	1.039	AT1A2_HUMAN	Sodium/potassium-transporting ATPase alpha-2 chain precursor (EC 3.6.3.9) (Sodium pump 2) (Na(+)/K(+) ATPase 2) - Homo sapiens (Human)
3	1.657	0.151	5.28	AT2A3_HUMAN	Sarcoplasmic/endoplasmic reticulum calcium ATPase 3 (EC 3.6.3.8) (Calcium pump 3) (SERCA3) (SR Ca(2+)-ATPase 3) - Homo sapiens (Human)
1	1.823	0.412	1.286	AT5G1_HUMAN	ATP synthase lipid-binding protein, mitochondrial precursor (EC 3.6.3.14) (ATP synthase proteolipid P1) (ATPase protein 9) (ATPase subunit C) - Homo sapiens (Human)
5	4.994	0.943	0.226	AT5G1_HUMAN	ATP synthase lipid-binding protein, mitochondrial precursor (EC 3.6.3.14) (ATP synthase proteolipid P1) (ATPase protein 9) (ATPase subunit C) - Homo sapiens (Human)
1	1.043	1.259	0.736	ATIF1_HUMAN	ATPase inhibitor, mitochondrial precursor - Homo sapiens (Human)
3	1.577	2.079	0.404	ATIF1_HUMAN	ATPase inhibitor, mitochondrial precursor - Homo sapiens (Human)
6	0.387	2.249	1.115	ATIF1_HUMAN	ATPase inhibitor, mitochondrial precursor - Homo sapiens (Human)
5	0.751	1.883	0.752	ATM_HUMAN	Serine-protein kinase ATM (EC 2.7.11.1) (Ataxia telangiectasia mutated) (A-T, mutated) - Homo sapiens (Human)
6	0.767	1.483	0.854	ATM_HUMAN	Serine-protein kinase ATM (EC 2.7.11.1) (Ataxia telangiectasia mutated) (A-T, mutated) - Homo sapiens (Human)
5	1.849	1.054	0.546	ATP5H_HUMAN	ATP synthase D chain, mitochondrial (EC 3.6.3.14) - Homo sapiens (Human)
2	1.079	1.124	0.793	ATP5L_HUMAN	ATP synthase subunit g, mitochondrial (EC 3.6.3.14) (ATPase subunit g) - Homo sapiens (Human)
5	2.587	0.453	0.907	ATP5L_HUMAN	ATP synthase subunit g, mitochondrial (EC 3.6.3.14) (ATPase subunit g) - Homo sapiens (Human)
6	0.44	0.692	3.186	ATP5L_HUMAN	ATP synthase subunit g, mitochondrial (EC 3.6.3.14) (ATPase subunit g) - Homo sapiens (Human)
6	0.113	−13.425	−0.638	ATP7B_HUMAN	Copper-transporting ATPase 2 (EC 3.6.3.4) (Copper pump 2) (Wilson disease-associated protein) - Homo sapiens (Human)
2	0.788	1.337	0.913	ATPA_HUMAN	ATP synthase subunit alpha, mitochondrial precursor (EC 3.6.3.14) - Homo sapiens (Human)
3	1.738	0.519	1.468	ATPA_HUMAN	ATP synthase subunit alpha, mitochondrial precursor (EC 3.6.3.14) - Homo sapiens (Human)
5	0.814	1.735	0.753	ATPA_HUMAN	ATP synthase subunit alpha, mitochondrial precursor (EC 3.6.3.14) - Homo sapiens (Human)
6	0.891	1.363	0.8	ATPA_HUMAN	ATP synthase subunit alpha, mitochondrial precursor (EC 3.6.3.14) - Homo sapiens (Human)
3	2.32	0.275	2.076	ATPB_HUMAN	ATP synthase subunit beta, mitochondrial precursor (EC 3.6.3.14) - Homo sapiens (Human)
5	2.118	0.829	0.606	ATPB_HUMAN	ATP synthase subunit beta, mitochondrial precursor (EC 3.6.3.14) - Homo sapiens (Human)
6	1.353	0.835	0.859	ATPB_HUMAN	ATP synthase subunit beta, mitochondrial precursor (EC 3.6.3.14) - Homo sapiens (Human)
5	1.161	1.116	0.821	ATPD_HUMAN	ATP synthase delta chain, mitochondrial precursor (EC 3.6.3.14) - Homo sapiens (Human)
5	2.428	0.651	0.672	ATPO_HUMAN	ATP synthase O subunit, mitochondrial precursor (EC 3.6.3.14) (Oligomycin sensitivity conferral protein) (OSCP) - Homo sapiens (Human)
1	0.847	0.686	1.661	ATX2L_HUMAN	Ataxin-2-like protein (Ataxin-2 domain protein) (Ataxin-2-related protein) - Homo sapiens (Human)
3	0.54	2.758	0.89	BCLF1_HUMAN	Bcl-2-associated transcription factor 1 (Btf) - Homo sapiens (Human)
5	0.841	1.395	0.906	BCLF1_HUMAN	Bcl-2-associated transcription factor 1 (Btf) - Homo sapiens (Human)
6	0.685	2.292	0.618	BCLF1_HUMAN	Bcl-2-associated transcription factor 1 (Btf) - Homo sapiens (Human)
3	0.449	0.793	3.726	BIN2_HUMAN	Bridging integrator 2 (Breast cancer-associated protein 1) - Homo sapiens (Human)
6	0.85	1.185	0.964	BIN2_HUMAN	Bridging integrator 2 (Breast cancer-associated protein 1) - Homo sapiens (Human)
2	1.067	0.861	1.048	BTK_HUMAN	Tyrosine-protein kinase BTK (EC 2.7.10.2) (Bruton tyrosine kinase) (Agammaglobulinaemia tyrosine kinase) (ATK) (B cell progenitor kinase) (BPK) - Homo sapiens (Human)
6	1.175	0.462	1.787	BTK_HUMAN	Tyrosine-protein kinase BTK (EC 2.7.10.2) (Bruton tyrosine kinase) (Agammaglobulinaemia tyrosine kinase) (ATK) (B cell progenitor kinase) (BPK) - Homo sapiens (Human)
5	1.161	−6.476	−0.141	CA123_HUMAN	Uncharacterized protein C1orf123 - Homo sapiens (Human)
1	0.549	1.185	1.485	CALM_HUMAN	Calmodulin (CaM) - Homo sapiens (Human)
2	1.294	0.63	1.181	CALM_HUMAN	Calmodulin (CaM) - Homo sapiens (Human)
3	1.677	0.52	1.518	CALM_HUMAN	Calmodulin (CaM) - Homo sapiens (Human)
5	2.754	1.404	0.275	CALM_HUMAN	Calmodulin (CaM) - Homo sapiens (Human)
1	1.017	0.865	1.098	CALR_HUMAN	Calreticulin precursor (CRP55) (Calregulin) (HACBP) (ERp60) (grp60) - Homo sapiens (Human)
2	0.918	0.905	1.157	CALR_HUMAN	Calreticulin precursor (CRP55) (Calregulin) (HACBP) (ERp60) (grp60) - Homo sapiens (Human)
3	2.881	0.642	0.716	CALR_HUMAN	Calreticulin precursor (CRP55) (Calregulin) (HACBP) (ERp60) (grp60) - Homo sapiens (Human)
4	0.819	1.811	0.639	CALR_HUMAN	Calreticulin precursor (CRP55) (Calregulin) (HACBP) (ERp60) (grp60) - Homo sapiens (Human)
6	0.824	0.897	1.312	CALR_HUMAN	Calreticulin precursor (CRP55) (Calregulin) (HACBP) (ERp60) (grp60) - Homo sapiens (Human)
6	0.567	0.86	1.991	CALX_HUMAN	Calnexin precursor (Major histocompatibility complex class I antigen-binding protein p88) (p90) (IP90) - Homo sapiens (Human)
1	1.206	0.707	1.093	CAP1_HUMAN	Adenylyl cyclase-associated protein 1 (CAP 1) - Homo sapiens (Human)
5	0.619	−9.67	−0.178	CAP1_HUMAN	Adenylyl cyclase-associated protein 1 (CAP 1) - Homo sapiens (Human)
6	0.45	0.98	2.203	CAP1_HUMAN	Adenylyl cyclase-associated protein 1 (CAP 1) - Homo sapiens (Human)
4	0.883	2.196	0.489	CAPG_HUMAN	Macrophage capping protein (Actin-regulatory protein CAP-G) - Homo sapiens (Human)
5	1.233	0.91	0.947	CAPG_HUMAN	Macrophage capping protein (Actin-regulatory protein CAP-G) - Homo sapiens (Human)
6	0.725	0.898	1.491	CAPG_HUMAN	Macrophage capping protein (Actin-regulatory protein CAP-G) - Homo sapiens (Human)
6	1.297	−7.279	−0.103	CAPZB_HUMAN	F-actin capping protein subunit beta (CapZ beta) - Homo sapiens (Human)
2	0.835	0.728	1.583	CATA_HUMAN	Catalase (EC 1.11.1.6) - Homo sapiens (Human)
3	0.728	0.753	2.417	CAZA1_HUMAN	F-actin capping protein subunit alpha-1 (CapZ alpha-1) - Homo sapiens (Human)
5	0.894	0.692	1.719	CAZA1_HUMAN	F-actin capping protein subunit alpha-1 (CapZ alpha-1) - Homo sapiens (Human)
2	0.64	1.115	1.349	CCD72_HUMAN	Coiled-coil domain-containing protein 72 - Homo sapiens (Human)
5	1.715	0.597	1.038	CCD72_HUMAN	Coiled-coil domain-containing protein 72 - Homo sapiens (Human)
6	1.539	−6.927	−0.091	CD14_HUMAN	Monocyte differentiation antigen CD14 precursor (Myeloid cell-specific leucine-rich glycoprotein) [Contains: Monocyte differentiation antigen CD14, urinary form; Monocyte differentiation antigen CD14, membrane-bound form] - Homo sapiens (Human)
2	0.912	0.952	1.108	CD45_HUMAN	Leukocyte common antigen precursor (EC 3.1.3.48) (L-CA) (T200) (CD45 antigen) - Homo sapiens (Human)
3	0.803	1.608	1.026	CDC37_HUMAN	Hsp90 co-chaperone Cdc37 (Hsp90 chaperone protein kinase-targeting subunit) (p50Cdc37) - Homo sapiens (Human)
5	0.695	1.731	0.885	CDC5L_HUMAN	Cell division cycle 5-like protein (Cdc5-like protein) (Pombe cdc5-related protein) - Homo sapiens (Human)
6	0.766	1.018	1.244	CDC5L_HUMAN	Cell division cycle 5-like protein (Cdc5-like protein) (Pombe cdc5-related protein) - Homo sapiens (Human)
2	0.902	1.003	1.063	CENPB_HUMAN	Major centromere autoantigen B (Centromere protein B) (CENP-B) - Homo sapiens (Human)
1	0.84	1.493	0.771	CH10_HUMAN	10 kDa heat shock protein, mitochondrial (Hsp10) (10 kDa chaperonin) (CPN10) (Early-pregnancy factor) (EPF) - Homo sapiens (Human)
2	0.803	1.112	1.077	CH10_HUMAN	10 kDa heat shock protein, mitochondrial (Hsp10) (10 kDa chaperonin) (CPN10) (Early-pregnancy factor) (EPF) - Homo sapiens (Human)
5	1.501	1.081	0.635	CH10_HUMAN	10 kDa heat shock protein, mitochondrial (Hsp10) (10 kDa chaperonin) (CPN10) (Early-pregnancy factor) (EPF) - Homo sapiens (Human)
6	0.64	1.744	0.869	CH10_HUMAN	10 kDa heat shock protein, mitochondrial (Hsp10) (10 kDa chaperonin) (CPN10) (Early-pregnancy factor) (EPF) - Homo sapiens (Human)
1	1.007	0.916	1.052	CH60_HUMAN	60 kDa heat shock protein, mitochondrial precursor (Hsp60) (60 kDa chaperonin) (CPN60) (Heat shock protein 60) (HSP-60) (Mitochondrial matrix protein P1) (P60 lymphocyte protein) (HuCHA60) - Homo sapiens (Human)
2	0.682	1.249	1.129	CH60_HUMAN	60 kDa heat shock protein, mitochondrial precursor (Hsp60) (60 kDa chaperonin) (CPN60) (Heat shock protein 60) (HSP-60) (Mitochondrial matrix protein P1) (P60 lymphocyte protein) (HuCHA60) - Homo sapiens (Human)
4	1.054	1.598	0.563	CH60_HUMAN	60 kDa heat shock protein, mitochondrial precursor (Hsp60) (60 kDa chaperonin) (CPN60) (Heat shock protein 60) (HSP-60) (Mitochondrial matrix protein P1) (P60 lymphocyte protein) (HuCHA60) - Homo sapiens (Human)
5	1.394	1.012	0.495	CH60_HUMAN	60 kDa heat shock protein, mitochondrial precursor (Hsp60) (60 kDa chaperonin) (CPN60) (Heat shock protein 60) (HSP-60) (Mitochondrial matrix protein P1) (P60 lymphocyte protein) (HuCHA60) - Homo sapiens (Human)
6	1.73	0.981	0.572	CH60_HUMAN	60 kDa heat shock protein, mitochondrial precursor (Hsp60) (60 kDa chaperonin) (CPN60) (Heat shock protein 60) (HSP-60) (Mitochondrial matrix protein P1) (P60 lymphocyte protein) (HuCHA60) - Homo sapiens (Human)
2	1.019	1.328	0.711	CHD4_HUMAN	Chromodomain helicase-DNA-binding protein 4 (EC 3.6.1.-) (ATP-dependent helicase CHD4) (CHD-4) (Mi-2 autoantigen 218 kDa protein) (Mi2-beta) - Homo sapiens (Human)
6	0.796	1.103	1.104	CISY_HUMAN	Citrate synthase, mitochondrial precursor (EC 2.3.3.1) - Homo sapiens (Human)
6	1.027	1.524	0.62	CLCA_HUMAN	Clathrin light chain A (Lca) - Homo sapiens (Human)
2	0.952	0.969	1.042	CLH1_HUMAN	Clathrin heavy chain 1 (CLH-17) - Homo sapiens (Human)
6	0.878	1.428	0.774	CLH1_HUMAN	Clathrin heavy chain 1 (CLH-17) - Homo sapiens (Human)
1	1.082	0.796	1.122	CLIC1_HUMAN	Chloride intracellular channel protein 1 (Nuclear chloride ion channel 27) (NCC27) (Chloride channel ABP) (Regulatory nuclear chloride ion channel protein) (hRNCC) - Homo sapiens (Human)
2	1.085	0.671	1.285	CLIC1_HUMAN	Chloride intracellular channel protein 1 (Nuclear chloride ion channel 27) (NCC27) (Chloride channel ABP) (Regulatory nuclear chloride ion channel protein) (hRNCC) - Homo sapiens (Human)
5	1.489	0.388	1.839	CLIC1_HUMAN	Chloride intracellular channel protein 1 (Nuclear chloride ion channel 27) (NCC27) (Chloride channel ABP) (Regulatory nuclear chloride ion channel protein) (hRNCC) - Homo sapiens (Human)
6	3.354	0.224	1.291	CLIC1_HUMAN	Chloride intracellular channel protein 1 (Nuclear chloride ion channel 27) (NCC27) (Chloride channel ABP) (Regulatory nuclear chloride ion channel protein) (hRNCC) - Homo sapiens (Human)
6	0.429	2.146	1.055	CN166_HUMAN	Protein C14orf166 - Homo sapiens (Human)
1	0.675	0.978	1.463	CNDP2_HUMAN	Cytosolic nonspecific dipeptidase (Glutamate carboxypeptidase-like protein 1) (CNDP dipeptidase 2) - Homo sapiens (Human)
3	0.815	1.133	1.435	CNDP2_HUMAN	Cytosolic nonspecific dipeptidase (Glutamate carboxypeptidase-like protein 1) (CNDP dipeptidase 2) - Homo sapiens (Human)
6	2.152	0.39	1.156	CNN2_HUMAN	Calponin-2 (Calponin H2, smooth muscle) (Neutral calponin) - Homo sapiens (Human)
1	0.842	1.096	1.028	COF1_HUMAN	Cofilin-1 (Cofilin, non-muscle isoform) (18 kDa phosphoprotein) (p18) - Homo sapiens (Human)
2	0.955	0.796	1.266	COF1_HUMAN	Cofilin-1 (Cofilin, non-muscle isoform) (18 kDa phosphoprotein) (p18) - Homo sapiens (Human)
3	0.555	1.41	1.599	COF1_HUMAN	Cofilin-1 (Cofilin, non-muscle isoform) (18 kDa phosphoprotein) (p18) - Homo sapiens (Human)
5	0.69	0.976	1.58	COF1_HUMAN	Cofilin-1 (Cofilin, non-muscle isoform) (18 kDa phosphoprotein) (p18) - Homo sapiens (Human)
6	2.168	0.409	1.138	COF1_HUMAN	Cofilin-1 (Cofilin, non-muscle isoform) (18 kDa phosphoprotein) (p18) - Homo sapiens (Human)
5	1.173	1.145	0.792	COPD_HUMAN	Coatomer subunit delta (Delta-coat protein) (Delta-COP) (Archain) - Homo sapiens (Human)
6	0.882	0.991	1.11	COPD_HUMAN	Coatomer subunit delta (Delta-coat protein) (Delta-COP) (Archain) - Homo sapiens (Human)
1	0.961	1.066	0.943	COR1A_HUMAN	Coronin-1A (Coronin-like protein p57) (Coronin-like protein A) (Clipin-A) (Tryptophan aspartate-containing coat protein) (TACO) - Homo sapiens (Human)
2	0.949	0.91	1.115	COR1A_HUMAN	Coronin-1A (Coronin-like protein p57) (Coronin-like protein A) (Clipin-A) (Tryptophan aspartate-containing coat protein) (TACO) - Homo sapiens (Human)
3	0.508	1	2.608	COR1A_HUMAN	Coronin-1A (Coronin-like protein p57) (Coronin-like protein A) (Clipin-A) (Tryptophan aspartate-containing coat protein) (TACO) - Homo sapiens (Human)
4	1.168	1.483	0.547	COR1A_HUMAN	Coronin-1A (Coronin-like protein p57) (Coronin-like protein A) (Clipin-A) (Tryptophan aspartate-containing coat protein) (TACO) - Homo sapiens (Human)
5	0.766	1.09	1.273	COR1A_HUMAN	Coronin-1A (Coronin-like protein p57) (Coronin-like protein A) (Clipin-A) (Tryptophan aspartate-containing coat protein) (TACO) - Homo sapiens (Human)
6	0.922	0.793	1.327	COR1A_HUMAN	Coronin-1A (Coronin-like protein p57) (Coronin-like protein A) (Clipin-A) (Tryptophan aspartate-containing coat protein) (TACO) - Homo sapiens (Human)
1	0.89	2.523	0.43	COTL1_HUMAN	Coactosin-like protein - Homo sapiens (Human)
2	1.514	0.654	0.971	COTL1_HUMAN	Coactosin-like protein - Homo sapiens (Human)
3	0.931	1.132	1.257	COTL1_HUMAN	Coactosin-like protein - Homo sapiens (Human)
5	1.051	0.379	2.673	COTL1_HUMAN	Coactosin-like protein - Homo sapiens (Human)
6	0.864	0.494	2.274	COTL1_HUMAN	Coactosin-like protein - Homo sapiens (Human)
5	2.196	1.229	0.394	COX41_HUMAN	Cytochrome c oxidase subunit 4 isoform 1, mitochondrial precursor (EC 1.9.3.1) (Cytochrome c oxidase subunit IV isoform 1) (COX IV-1) (Cytochrome c oxidase polypeptide IV) - Homo sapiens (Human)
2	0.964	0.849	1.176	COX5B_HUMAN	Cytochrome c oxidase subunit 5B, mitochondrial precursor (EC 1.9.3.1) (Cytochrome c oxidase polypeptide Vb) - Homo sapiens (Human)
5	0.88	0.968	1.249	COX5B_HUMAN	Cytochrome c oxidase subunit 5B, mitochondrial precursor (EC 1.9.3.1) (Cytochrome c oxidase polypeptide Vb) - Homo sapiens (Human)
6	1.095	1.11	0.798	COX5B_HUMAN	Cytochrome c oxidase subunit 5B, mitochondrial precursor (EC 1.9.3.1) (Cytochrome c oxidase polypeptide Vb) - Homo sapiens (Human)
2	0.848	1.287	0.882	COX6C_HUMAN	Cytochrome c oxidase polypeptide VIc precursor (EC 1.9.3.1) - Homo sapiens (Human)
6	0.515	1.164	1.619	COX6C_HUMAN	Cytochrome c oxidase polypeptide VIc precursor (EC 1.9.3.1) - Homo sapiens (Human)
6	0.318	2.858	1.067	CPSF5_HUMAN	Cleavage and polyadenylation specificity factor 5 (Cleavage and polyadenylation specificity factor 25 kDa subunit) (CPSF 25 kDa subunit) (Pre-mRNA cleavage factor Im 25 kDa subunit) (Nucleoside diphosphate-linked moiety X motif 21) (Nudix motif 21)
6	0.656	1.774	0.834	CPSF6_HUMAN	Cleavage and polyadenylation specificity factor 6 (Cleavage and polyadenylation specificity factor 68 kDa subunit) (CPSF 68 kDa subunit) (Pre-mRNA cleavage factor Im 68 kDa subunit) (Protein HPBRII-4/7) - Homo sapiens (Human)
6	0.415	1.922	1.216	CPSF7_HUMAN	Cleavage and polyadenylation specificity factor 7 (Cleavage and polyadenylation specificity factor 59 kDa subunit) (CPSF 59 kDa subunit) (Pre-mRNA cleavage factor Im 59 kDa subunit) - Homo sapiens (Human)
2	1.581	0.579	1.05	CSN5_HUMAN	COP9 signalosome complex subunit 5 (EC 3.4.-.-) (Signalosome subunit 5) (SGN5) (Jun activation domain-binding protein 1) - Homo sapiens (Human)
5	0.662	1.046	1.535	CSN5_HUMAN	COP9 signalosome complex subunit 5 (EC 3.4.-.-) (Signalosome subunit 5) (SGN5) (Jun activation domain-binding protein 1) - Homo sapiens (Human)
2	0.76	0.972	1.302	CUTC_HUMAN	Copper homeostasis protein cutC homolog - Homo sapiens (Human)
6	0.826	1.266	0.928	CV028_HUMAN	UPF0027 protein C22orf28 - Homo sapiens (Human)
2	1.036	0.747	1.243	CX6B1_HUMAN	Cytochrome c oxidase subunit VIb isoform 1 (EC 1.9.3.1) (COX VIb-1) - Homo sapiens (Human)
6	1.959	2.103	0.235	CXCC1_HUMAN	CpG-binding protein (PHD finger and CXXC domain-containing protein 1) (CXXC-type zinc finger protein 1) - Homo sapiens (Human)
2	1.05	1.011	0.973	CYC_HUMAN	Cytochrome c - Homo sapiens (Human)
5	2.636	0.421	0.957	CYC_HUMAN	Cytochrome c - Homo sapiens (Human)
2	0.762	0.672	1.881	DCTN2_HUMAN	Dynactin subunit 2 (Dynactin complex 50 kDa subunit) (50 kDa dynein-associated polypeptide) (p50 dynamitin) (DCTN-50) - Homo sapiens (Human)
2	1.719	0.43	1.303	DDAH2_HUMAN	NG,NG-dimethylarginine dimethylaminohydrolase 2 (EC 3.5.3.18) (Dimethylargininase-2) (Dimethylarginine dimethylaminohydrolase 2) (DDAHII) (DDAH-2) (S-phase protein) (Protein G6a) - Homo sapiens (Human)
6	0.479	2.942	0.688	DDX1_HUMAN	ATP-dependent RNA helicase DDX1 (EC 3.6.1.-) (DEAD box protein 1) (DEAD box protein retinoblastoma) (DBP-RB) - Homo sapiens (Human)
2	0.536	1.868	0.921	DDX17_HUMAN	Probable ATP-dependent RNA helicase DDX17 (EC 3.6.1.-) (DEAD box protein 17) (RNA-dependent helicase p72) (DEAD box protein p72) - Homo sapiens (Human)
5	0.537	1.979	1	DDX17_HUMAN	Probable ATP-dependent RNA helicase DDX17 (EC 3.6.1.-) (DEAD box protein 17) (RNA-dependent helicase p72) (DEAD box protein p72) - Homo sapiens (Human)
5	0.702	0.974	1.556	DDX21_HUMAN	Nucleolar RNA helicase 2 (EC 3.6.1.-) (Nucleolar RNA helicase II) (Nucleolar RNA helicase Gu) (RH II/Gu) (Gu-alpha) (DEAD box protein 21) - Homo sapiens (Human)
2	0.986	0.842	1.159	DDX39_HUMAN	ATP-dependent RNA helicase DDX39 (EC 3.6.1.-) (DEAD box protein 39) (Nuclear RNA helicase URH49) - Homo sapiens (Human)
5	0.88	1.509	0.801	DDX39_HUMAN	ATP-dependent RNA helicase DDX39 (EC 3.6.1.-) (DEAD box protein 39) (Nuclear RNA helicase URH49) - Homo sapiens (Human)
6	0.45	2.95	0.732	DDX39_HUMAN	ATP-dependent RNA helicase DDX39 (EC 3.6.1.-) (DEAD box protein 39) (Nuclear RNA helicase URH49) - Homo sapiens (Human)
1	1.474	2.494	0.263	DDX3X_HUMAN	ATP-dependent RNA helicase DDX3X (EC 3.6.1.-) (DEAD box protein 3, X-chromosomal) (Helicase-like protein 2) (HLP2) (DEAD box, X isoform) - Homo sapiens (Human)
1	−0.023	1.702	−24.988	DDX48_HUMAN	Probable ATP-dependent RNA helicase DDX48 (EC 3.6.1.-) (DEAD box protein 48) (Eukaryotic initiation factor 4A-like NUK-34) (Nuclear matrix protein 265) (hNMP 265) (Eukaryotic translation initiation factor 4A isoform 3) - Homo sapiens (Human)
2	0.961	1.205	0.895	DDX48_HUMAN	Probable ATP-dependent RNA helicase DDX48 (EC 3.6.1.-) (DEAD box protein 48) (Eukaryotic initiation factor 4A-like NUK-34) (Nuclear matrix protein 265) (hNMP 265) (Eukaryotic translation initiation factor 4A isoform 3) - Homo sapiens (Human)
3	0.706	0.291	6.448	DDX48_HUMAN	Probable ATP-dependent RNA helicase DDX48 (EC 3.6.1.-) (DEAD box protein 48) (Eukaryotic initiation factor 4A-like NUK-34) (Nuclear matrix protein 265) (hNMP 265) (Eukaryotic translation initiation factor 4A isoform 3) - Homo sapiens (Human)
5	0.823	1.023	1.263	DDX48_HUMAN	Probable ATP-dependent RNA helicase DDX48 (EC 3.6.1.-) (DEAD box protein 48) (Eukaryotic initiation factor 4A-like NUK-34) (Nuclear matrix protein 265) (hNMP 265) (Eukaryotic translation initiation factor 4A isoform 3) - Homo sapiens (Human)
6	−1958.532	0.01	−0.049	DDX48_HUMAN	Probable ATP-dependent RNA helicase DDX48 (EC 3.6.1.-) (DEAD box protein 48) (Eukaryotic initiation factor 4A-like NUK-34) (Nuclear matrix protein 265) (hNMP 265) (Eukaryotic translation initiation factor 4A isoform 3) - Homo sapiens (Human)
5	14.561	−0.71	−0.103	DEF1_HUMAN	Neutrophil defensin 1 precursor (HNP-1) (HP-1) (HP1) (Defensin, alpha 1) [Contains: HP 1-56; Neutrophil defensin 2 (HNP-2) (HP-2) (HP2)] - Homo sapiens (Human)
2	1.227	0.691	1.136	DEK_HUMAN	Protein DEK - Homo sapiens (Human)
5	0.835	1.283	0.992	DEK_HUMAN	Protein DEK - Homo sapiens (Human)
2	0.778	0.922	1.342	DHE3_HUMAN	Glutamate dehydrogenase 1, mitochondrial precursor (EC 1.4.1.3) (GDH) - Homo sapiens (Human)
6	0.267	2.289	1.587	DHE3_HUMAN	Glutamate dehydrogenase 1, mitochondrial precursor (EC 1.4.1.3) (GDH) - Homo sapiens (Human)
2	1.296	0.78	0.952	DHX15_HUMAN	Putative pre-mRNA-splicing factor ATP-dependent RNA helicase DHX15 (EC 3.6.1.-) (DEAH box protein 15) (ATP-dependent RNA helicase #46) - Homo sapiens (Human)
5	0.949	1.092	1.027	DHX15_HUMAN	Putative pre-mRNA-splicing factor ATP-dependent RNA helicase DHX15 (EC 3.6.1.-) (DEAH box protein 15) (ATP-dependent RNA helicase #46) - Homo sapiens (Human)
6	1.767	−6.317	−0.087	DHX15_HUMAN	Putative pre-mRNA-splicing factor ATP-dependent RNA helicase DHX15 (EC 3.6.1.-) (DEAH box protein 15) (ATP-dependent RNA helicase #46) - Homo sapiens (Human)
1	1.045	1.142	0.81	DHX9_HUMAN	ATP-dependent RNA helicase A (EC 3.6.1.-) (Nuclear DNA helicase II) (NDH II) (DEAH box protein 9) - Homo sapiens (Human)
2	0.801	1.167	1.029	DHX9_HUMAN	ATP-dependent RNA helicase A (EC 3.6.1.-) (Nuclear DNA helicase II) (NDH II) (DEAH box protein 9) - Homo sapiens (Human)
5	1.02	1.37	0.761	DHX9_HUMAN	ATP-dependent RNA helicase A (EC 3.6.1.-) (Nuclear DNA helicase II) (NDH II) (DEAH box protein 9) - Homo sapiens (Human)
6	0.78	1.118	1.112	DHX9_HUMAN	ATP-dependent RNA helicase A (EC 3.6.1.-) (Nuclear DNA helicase II) (NDH II) (DEAH box protein 9) - Homo sapiens (Human)
2	0.814	1.341	0.882	DLDH_HUMAN	Dihydrolipoyl dehydrogenase, mitochondrial precursor (EC 1.8.1.4) (Dihydrolipoamide dehydrogenase) (Glycine cleavage system L protein) - Homo sapiens (Human)
2	1.035	0.979	0.949	DNJB1_HUMAN	DnaJ homolog subfamily B member 1 (Heat shock 40 kDa protein 1) (Heat shock protein 40) (HSP40) (DnaJ protein homolog 1) (HDJ-1) - Homo sapiens (Human)
2	0.971	0.826	1.2	DNPEP_HUMAN	Aspartyl aminopeptidase (EC 3.4.11.21) - Homo sapiens (Human)
2	0.826	1.106	1.053	DOC10_HUMAN	Dedicator of cytokinesis protein 10 (Zizimin-3) - Homo sapiens (Human)
5	1.5	1.033	0.686	DPOE4_HUMAN	DNA polymerase epsilon subunit 4 (EC 2.7.7.7) (DNA polymerase II subunit 4) (DNA polymerase epsilon subunit p12) - Homo sapiens (Human)
5	2.115	−4.099	−0.123	DPYL2_HUMAN	Dihydropyrimidinase-related protein 2 (DRP-2) (Collapsin response mediator protein 2) (CRMP-2) (N2A3) - Homo sapiens (Human)
6	25.367	0.116	0.33	DPYL2_HUMAN	Dihydropyrimidinase-related protein 2 (DRP-2) (Collapsin response mediator protein 2) (CRMP-2) (N2A3) - Homo sapiens (Human)
5	1.029	1.335	0.774	DYN2_HUMAN	Dynamin-2 (EC 3.6.5.5) - Homo sapiens (Human)
1	1.248	1.067	0.725	DYSF_HUMAN	Dysferlin (Dystrophy-associated fer-1-like protein) (Fer-1-like protein 1) - Homo sapiens (Human)
2	−−−	−−−	−−−	ECHA_HUMAN	Trifunctional enzyme subunit alpha, mitochondrial precursor (TP-alpha) (78 kDa gastrin-binding protein) [Includes: Long-chain enoyl-CoA hydratase (EC 4.2.1.17); Long chain 3-hydroxyacyl-CoA dehydrogenase (EC 1.1.1.211)] - Homo sapiens (Human)
2	0.795	2.16	0.56	ECHB_HUMAN	Trifunctional enzyme subunit beta, mitochondrial precursor (TP-beta) [Includes: 3-ketoacyl-CoA thiolase (EC 2.3.1.16) (Acetyl-CoA acyltransferase) (Beta-ketothiolase)] - Homo sapiens (Human)
5	2.155	1.102	0.448	ECHB_HUMAN	Trifunctional enzyme subunit beta, mitochondrial precursor (TP-beta) [Includes: 3-ketoacyl-CoA thiolase (EC 2.3.1.16) (Acetyl-CoA acyltransferase) (Beta-ketothiolase)] - Homo sapiens (Human)
6	0.905	1.062	1.01	ECHM_HUMAN	Enoyl-CoA hydratase, mitochondrial precursor (EC 4.2.1.17) (Short chain enoyl-CoA hydratase) (SCEH) (Enoyl-CoA hydratase 1) - Homo sapiens (Human)
2	0.96	0.919	1.09	ECM29_HUMAN	Proteasome-associated protein ECM29 homolog (Ecm29) - Homo sapiens (Human)
5	1.37	1.119	0.694	EF1A1_HUMAN	Elongation factor 1-alpha 1 (EF-1-alpha-1) (Elongation factor 1 A-1) (eEF1A-1) (Elongation factor Tu) (EF-Tu) (Leukocyte receptor cluster member 7) - Homo sapiens (Human)
1	1.253	1.432	0.538	EF1A2_HUMAN	Elongation factor 1-alpha 2 (EF-1-alpha-2) (Elongation factor 1 A-2) (eEF1A-2) (Statin S1) - Homo sapiens (Human)
2	1.135	0.803	1.056	EF1A2_HUMAN	Elongation factor 1-alpha 2 (EF-1-alpha-2) (Elongation factor 1 A-2) (eEF1A-2) (Statin S1) - Homo sapiens (Human)
3	0.781	1.044	1.623	EF1A2_HUMAN	Elongation factor 1-alpha 2 (EF-1-alpha-2) (Elongation factor 1 A-2) (eEF1A-2) (Statin S1) - Homo sapiens (Human)
4	0.799	2.332	0.509	EF1A2_HUMAN	Elongation factor 1-alpha 2 (EF-1-alpha-2) (Elongation factor 1 A-2) (eEF1A-2) (Statin S1) - Homo sapiens (Human)
6	1.049	0.726	1.273	EF1A2_HUMAN	Elongation factor 1-alpha 2 (EF-1-alpha-2) (Elongation factor 1 A-2) (eEF1A-2) (Statin S1) - Homo sapiens (Human)
2	1.047	0.803	1.145	EF1B_HUMAN	Elongation factor 1-beta (EF-1-beta) - Homo sapiens (Human)
4	1.119	2.767	0.306	EF1B_HUMAN	Elongation factor 1-beta (EF-1-beta) - Homo sapiens (Human)
5	0.746	1.381	1.033	EF1B_HUMAN	Elongation factor 1-beta (EF-1-beta) - Homo sapiens (Human)
6	1.176	1.218	0.677	EF1B_HUMAN	Elongation factor 1-beta (EF-1-beta) - Homo sapiens (Human)
3	0.594	0.852	2.614	EF1D_HUMAN	Elongation factor 1-delta (EF-1-delta) (Antigen NY-CO-4) - Homo sapiens (Human)
6	1.145	1.216	0.697	EF1D_HUMAN	Elongation factor 1-delta (EF-1-delta) (Antigen NY-CO-4) - Homo sapiens (Human)
1	0.766	1.483	0.851	EF1G_HUMAN	Elongation factor 1-gamma (EF-1-gamma) (eEF-1B gamma) - Homo sapiens (Human)
1	0.816	1.531	0.773	EF2_HUMAN	Elongation factor 2 (EF-2) - Homo sapiens (Human)
2	0.994	1.102	0.878	EF2_HUMAN	Elongation factor 2 (EF-2) - Homo sapiens (Human)
3	0.926	1.532	0.934	EF2_HUMAN	Elongation factor 2 (EF-2) - Homo sapiens (Human)
4	1.114	1.717	0.496	EF2_HUMAN	Elongation factor 2 (EF-2) - Homo sapiens (Human)
5	0.765	1.192	1.166	EF2_HUMAN	Elongation factor 2 (EF-2) - Homo sapiens (Human)
6	1.017	0.85	1.122	EF2_HUMAN	Elongation factor 2 (EF-2) - Homo sapiens (Human)
2	0.898	0.922	1.163	EHD1_HUMAN	EH domain-containing protein 1 (Testilin) (hPAST1) - Homo sapiens (Human)
5	1.052	0.657	1.537	EHD1_HUMAN	EH domain-containing protein 1 (Testilin) (hPAST1) - Homo sapiens (Human)
6	1.002	0.674	1.437	EHD1_HUMAN	EH domain-containing protein 1 (Testilin) (hPAST1) - Homo sapiens (Human)
2	0.982	1	0.98	ELAV1_HUMAN	ELAV-like protein 1 (Hu-antigen R) (HuR) - Homo sapiens (Human)
5	1.241	1.287	0.666	ELAV1_HUMAN	ELAV-like protein 1 (Hu-antigen R) (HuR) - Homo sapiens (Human)
6	0.488	1.692	1.175	ELAV1_HUMAN	ELAV-like protein 1 (Hu-antigen R) (HuR) - Homo sapiens (Human)
1	0.958	1.478	0.682	ENOA_HUMAN	Alpha-enolase (EC 4.2.1.11) (2-phospho-D-glycerate hydro-lyase) (Non-neural enolase) (NNE) (Enolase 1) (Phosphopyruvate hydratase) (C-myc promoter-binding protein) (MBP-1) (MPB-1) (Plasminogen-binding protein) - Homo sapiens (Human)
2	0.75	0.944	1.459	ENOA_HUMAN	Alpha-enolase (EC 4.2.1.11) (2-phospho-D-glycerate hydro-lyase) (Non-neural enolase) (NNE) (Enolase 1) (Phosphopyruvate hydratase) (C-myc promoter-binding protein) (MBP-1) (MPB-1) (Plasminogen-binding protein) - Homo sapiens (Human)
4	1.346	1.445	0.487	ENOA_HUMAN	Alpha-enolase (EC 4.2.1.11) (2-phospho-D-glycerate hydro-lyase) (Non-neural enolase) (NNE) (Enolase 1) (Phosphopyruvate hydratase) (C-myc promoter-binding protein) (MBP-1) (MPB-1) (Plasminogen-binding protein) - Homo sapiens (Human)
5	1.73	0.406	1.512	ENOA_HUMAN	Alpha-enolase (EC 4.2.1.11) (2-phospho-D-glycerate hydro-lyase) (Non-neural enolase) (NNE) (Enolase 1) (Phosphopyruvate hydratase) (C-myc promoter-binding protein) (MBP-1) (MPB-1) (Plasminogen-binding protein) - Homo sapiens (Human)
6	1.763	0.385	1.43	ENOA_HUMAN	Alpha-enolase (EC 4.2.1.11) (2-phospho-D-glycerate hydro-lyase) (Non-neural enolase) (NNE) (Enolase 1) (Phosphopyruvate hydratase) (C-myc promoter-binding protein) (MBP-1) (MPB-1) (Plasminogen-binding protein) - Homo sapiens (Human)
1	1.086	1.016	0.876	ENPL_HUMAN	Endoplasmin precursor (Heat shock protein 90 kDa beta member 1) (94 kDa glucose-regulated protein) (GRP94) (gp96 homolog) (Tumor rejection antigen 1) - Homo sapiens (Human)
3	2.529	0.533	0.983	ENPL_HUMAN	Endoplasmin precursor (Heat shock protein 90 kDa beta member 1) (94 kDa glucose-regulated protein) (GRP94) (gp96 homolog) (Tumor rejection antigen 1) - Homo sapiens (Human)
5	1.77	0.567	1.059	ENPL_HUMAN	Endoplasmin precursor (Heat shock protein 90 kDa beta member 1) (94 kDa glucose-regulated protein) (GRP94) (gp96 homolog) (Tumor rejection antigen 1) - Homo sapiens (Human)
6	1.808	0.608	0.883	ENPL_HUMAN	Endoplasmin precursor (Heat shock protein 90 kDa beta member 1) (94 kDa glucose-regulated protein) (GRP94) (gp96 homolog) (Tumor rejection antigen 1) - Homo sapiens (Human)
1	0.635	0.855	1.781	ERH_HUMAN	Enhancer of rudimentary homolog - Homo sapiens (Human)
2	0.848	0.967	1.173	ERH_HUMAN	Enhancer of rudimentary homolog - Homo sapiens (Human)
5	1.171	0.32	2.836	ERP29_HUMAN	Endoplasmic reticulum protein ERp29 precursor (ERp31) (ERp28) - Homo sapiens (Human)
6	1.419	0.333	2.054	ERP29_HUMAN	Endoplasmic reticulum protein ERp29 precursor (ERp31) (ERp28) - Homo sapiens (Human)
2	1.396	0.8	0.861	ESTD_HUMAN	S-formylglutathione hydrolase (EC 3.1.2.12) (FGH) (Esterase D) - Homo sapiens (Human)
2	1.036	0.982	0.946	ETFB_HUMAN	Electron transfer flavoprotein subunit beta (Beta-ETF) - Homo sapiens (Human)
6	0.942	1.254	0.821	ETFB_HUMAN	Electron transfer flavoprotein subunit beta (Beta-ETF) - Homo sapiens (Human)
1	0.784	2.156	0.572	EZRI_HUMAN	Ezrin (p81) (Cytovillin) (Villin-2) - Homo sapiens (Human)
3	0.778	1.896	0.898	EZRI_HUMAN	Ezrin (p81) (Cytovillin) (Villin-2) - Homo sapiens (Human)
5	0.789	1.087	1.241	EZRI_HUMAN	Ezrin (p81) (Cytovillin) (Villin-2) - Homo sapiens (Human)
6	1.016	1.335	0.715	EZRI_HUMAN	Ezrin (p81) (Cytovillin) (Villin-2) - Homo sapiens (Human)
5	0.839	1.342	0.944	F10A1_HUMAN	Hsc70-interacting protein (Hip) (Suppression of tumorigenicity protein 13) (Putative tumor suppressor ST13) (Protein FAM10A1) (Progesterone receptor-associated p48 protein) (Renal carcinoma antigen NY-REN-33) - Homo sapiens (Human)
6	2.136	0.791	0.574	F10A1_HUMAN	Hsc70-interacting protein (Hip) (Suppression of tumorigenicity protein 13) (Putative tumor suppressor ST13) (Protein FAM10A1) (Progesterone receptor-associated p48 protein) (Renal carcinoma antigen NY-REN-33) - Homo sapiens (Human)
1	1.08	3.035	0.295	FETUA_HUMAN	Alpha-2-HS-glycoprotein precursor (Fetuin-A) (Alpha-2-Z-globulin) (Ba-alpha-2-glycoprotein) [Contains: Alpha-2-HS-glycoprotein chain A; Alpha-2-HS-glycoprotein chain B] - Homo sapiens (Human)
3	0.599	3.852	0.574	FETUA_HUMAN	Alpha-2-HS-glycoprotein precursor (Fetuin-A) (Alpha-2-Z-globulin) (Ba-alpha-2-glycoprotein) [Contains: Alpha-2-HS-glycoprotein chain A; Alpha-2-HS-glycoprotein chain B] - Homo sapiens (Human)
5	0.651	10.183	0.162	FETUA_HUMAN	Alpha-2-HS-glycoprotein precursor (Fetuin-A) (Alpha-2-Z-globulin) (Ba-alpha-2-glycoprotein) [Contains: Alpha-2-HS-glycoprotein chain A; Alpha-2-HS-glycoprotein chain B] - Homo sapiens (Human)
6	0.143	18.213	0.422	FETUA_HUMAN	Alpha-2-HS-glycoprotein precursor (Fetuin-A) (Alpha-2-Z-globulin) (Ba-alpha-2-glycoprotein) [Contains: Alpha-2-HS-glycoprotein chain A; Alpha-2-HS-glycoprotein chain B] - Homo sapiens (Human)
2	0.755	0.185	6.909	FIBA_HUMAN	Fibrinogen alpha chain precursor [Contains: Fibrinopeptide A] - Homo sapiens (Human)
3	1.027	0.082	15.651	FIBB_HUMAN	Fibrinogen beta chain precursor [Contains: Fibrinopeptide B] - Homo sapiens (Human)
5	−6.443	−0.1	1.657	FIP1_HUMAN	Pre-mRNA 3~-end-processing factor FIP1 (FIP1-like 1) (Factor interacting with PAP) (hFip1) (Rearranged in hypereosinophilia) - Homo sapiens (Human)
6	1.882	0.409	1.261	FIP1_HUMAN	Pre-mRNA 3~-end-processing factor FIP1 (FIP1-like 1) (Factor interacting with PAP) (hFip1) (Rearranged in hypereosinophilia) - Homo sapiens (Human)
1	0.722	0.904	1.48	FKB1A_HUMAN	FK506-binding protein 1A (EC 5.2.1.8) (Peptidyl-prolyl cis-trans isomerase) (PPIase) (Rotamase) (12 kDa FKBP) (FKBP-12) (Immunophilin FKBP12) - Homo sapiens (Human)
3	0.435	2.212	1.375	FKB1A_HUMAN	FK506-binding protein 1A (EC 5.2.1.8) (Peptidyl-prolyl cis-trans isomerase) (PPIase) (Rotamase) (12 kDa FKBP) (FKBP-12) (Immunophilin FKBP12) - Homo sapiens (Human)
2	1.071	0.941	0.954	FKBP2_HUMAN	FK506-binding protein 2 precursor (EC 5.2.1.8) (Peptidyl-prolyl cis-trans isomerase) (PPIase) (Rotamase) (13 kDa FKBP) (FKBP-13) - Homo sapiens (Human)
1	1.113	0.235	3.7	FLNA_HUMAN	Filamin-A (Alpha-filamin) (Filamin-1) (Endothelial actin-binding protein) (Actin-binding protein 280) (ABP-280) (Nonmuscle filamin) - Homo sapiens (Human)
2	1.106	0.489	1.783	FLNA_HUMAN	Filamin-A (Alpha-filamin) (Filamin-1) (Endothelial actin-binding protein) (Actin-binding protein 280) (ABP-280) (Nonmuscle filamin) - Homo sapiens (Human)
3	0.795	0.283	5.896	FLNA_HUMAN	Filamin-A (Alpha-filamin) (Filamin-1) (Endothelial actin-binding protein) (Actin-binding protein 280) (ABP-280) (Nonmuscle filamin) - Homo sapiens (Human)
4	1.059	1.544	0.579	FLNA_HUMAN	Filamin-A (Alpha-filamin) (Filamin-1) (Endothelial actin-binding protein) (Actin-binding protein 280) (ABP-280) (Nonmuscle filamin) - Homo sapiens (Human)
5	0.622	0.546	3.131	FLNA_HUMAN	Filamin-A (Alpha-filamin) (Filamin-1) (Endothelial actin-binding protein) (Actin-binding protein 280) (ABP-280) (Nonmuscle filamin) - Homo sapiens (Human)
6	0.909	0.434	2.462	FLNA_HUMAN	Filamin-A (Alpha-filamin) (Filamin-1) (Endothelial actin-binding protein) (Actin-binding protein 280) (ABP-280) (Nonmuscle filamin) - Homo sapiens (Human)
3	0.854	0.788	1.97	FNBP1_HUMAN	Formin-binding protein 1 (Formin-binding protein 17) (hFBP17) - Homo sapiens (Human)
1	0.704	1.68	0.817	FUBP1_HUMAN	Far upstream element-binding protein 1 (FUSE-binding protein 1) (FBP) (DNA helicase V) (HDH V) - Homo sapiens (Human)
3	0.941	1.397	0.968	FUBP1_HUMAN	Far upstream element-binding protein 1 (FUSE-binding protein 1) (FBP) (DNA helicase V) (HDH V) - Homo sapiens (Human)
5	0.789	1.134	1.188	FUBP1_HUMAN	Far upstream element-binding protein 1 (FUSE-binding protein 1) (FBP) (DNA helicase V) (HDH V) - Homo sapiens (Human)
6	1.283	1.238	0.611	FUBP1_HUMAN	Far upstream element-binding protein 1 (FUSE-binding protein 1) (FBP) (DNA helicase V) (HDH V) - Homo sapiens (Human)
3	0.794	1.763	0.924	FUBP2_HUMAN	Far upstream element-binding protein 2 (FUSE-binding protein 2) (KH type-splicing regulatory protein) (KSRP) (p75) - Homo sapiens (Human)
5	0.859	1.303	0.951	FUBP2_HUMAN	Far upstream element-binding protein 2 (FUSE-binding protein 2) (KH type-splicing regulatory protein) (KSRP) (p75) - Homo sapiens (Human)
6	1.282	1.989	0.381	FUBP2_HUMAN	Far upstream element-binding protein 2 (FUSE-binding protein 2) (KH type-splicing regulatory protein) (KSRP) (p75) - Homo sapiens (Human)
2	0.929	0.878	1.179	FUSIP_HUMAN	FUS-interacting serine-arginine-rich protein 1 (TLS-associated protein with Ser-Arg repeats) (TLS-associated protein with SR repeats) (TASR) (TLS-associated serine-arginine protein) (TLS-associated SR protein) (40 kDa SR-repressor protein) (SRrp40)
4	1.047	1.593	0.568	FUSIP_HUMAN	FUS-interacting serine-arginine-rich protein 1 (TLS-associated protein with Ser-Arg repeats) (TLS-associated protein with SR repeats) (TASR) (TLS-associated serine-arginine protein) (TLS-associated SR protein) (40 kDa SR-repressor protein) (SRrp40)
5	0.716	1.535	0.968	FUSIP_HUMAN	FUS-interacting serine-arginine-rich protein 1 (TLS-associated protein with Ser-Arg repeats) (TLS-associated protein with SR repeats) (TASR) (TLS-associated serine-arginine protein) (TLS-associated SR protein) (40 kDa SR-repressor protein) (SRrp40)
6	1.11	1.751	0.499	FUSIP_HUMAN	FUS-interacting serine-arginine-rich protein 1 (TLS-associated protein with Ser-Arg repeats) (TLS-associated protein with SR repeats) (TASR) (TLS-associated serine-arginine protein) (TLS-associated SR protein) (40 kDa SR-repressor protein) (SRrp40)
1	0.997	1.459	0.672	G3P_HUMAN	Glyceraldehyde-3-phosphate dehydrogenase (EC 1.2.1.12) (GAPDH) - Homo sapiens (Human)
2	0.962	1.126	0.865	G3P_HUMAN	Glyceraldehyde-3-phosphate dehydrogenase (EC 1.2.1.12) (GAPDH) - Homo sapiens (Human)
3	1.117	1.721	0.689	G3P_HUMAN	Glyceraldehyde-3-phosphate dehydrogenase (EC 1.2.1.12) (GAPDH) - Homo sapiens (Human)
4	1.102	2.774	0.31	G3P_HUMAN	Glyceraldehyde-3-phosphate dehydrogenase (EC 1.2.1.12) (GAPDH) - Homo sapiens (Human)
5	0.955	1.21	0.92	G3P_HUMAN	Glyceraldehyde-3-phosphate dehydrogenase (EC 1.2.1.12) (GAPDH) - Homo sapiens (Human)
6	0.758	0.787	1.627	G3P_HUMAN	Glyceraldehyde-3-phosphate dehydrogenase (EC 1.2.1.12) (GAPDH) - Homo sapiens (Human)
2	0.931	0.904	1.142	G6PD_HUMAN	Glucose-6-phosphate 1-dehydrogenase (EC 1.1.1.49) (G6PD) - Homo sapiens (Human)
2	0.956	1.298	0.775	GANAB_HUMAN	Neutral alpha-glucosidase AB precursor (EC 3.2.1.84) (Glucosidase II subunit alpha) - Homo sapiens (Human)
5	0.878	1.304	0.929	GANAB_HUMAN	Neutral alpha-glucosidase AB precursor (EC 3.2.1.84) (Glucosidase II subunit alpha) - Homo sapiens (Human)
6	2.889	0.46	0.73	GANAB_HUMAN	Neutral alpha-glucosidase AB precursor (EC 3.2.1.84) (Glucosidase II subunit alpha) - Homo sapiens (Human)
1	−0.023	1.88	−22.602	GBG2_HUMAN	Guanine nucleotide-binding protein G(I)/G(S)/G(O) gamma-2 subunit precursor (G gamma-I) - Homo sapiens (Human)
1	0.888	1.634	0.665	GDIA_HUMAN	Rab GDP dissociation inhibitor alpha (Rab GDI alpha) (Guanosine diphosphate dissociation inhibitor 1) (GDI-1) (XAP-4) (Oligophrenin-2) - Homo sapiens (Human)
5	0.979	0.86	1.263	GDIB_HUMAN	Rab GDP dissociation inhibitor beta (Rab GDI beta) (Guanosine diphosphate dissociation inhibitor 2) (GDI-2) - Homo sapiens (Human)
6	1.251	1.169	0.663	GDIB_HUMAN	Rab GDP dissociation inhibitor beta (Rab GDI beta) (Guanosine diphosphate dissociation inhibitor 2) (GDI-2) - Homo sapiens (Human)
1	0.765	1.284	0.983	GDIS_HUMAN	Rho GDP-dissociation inhibitor 2 (Rho GDI 2) (Rho-GDI beta) (Ly-GDI) - Homo sapiens (Human)
2	2.34	0.409	1.005	GDIS_HUMAN	Rho GDP-dissociation inhibitor 2 (Rho GDI 2) (Rho-GDI beta) (Ly-GDI) - Homo sapiens (Human)
3	0.712	1.244	1.495	GDIS_HUMAN	Rho GDP-dissociation inhibitor 2 (Rho GDI 2) (Rho-GDI beta) (Ly-GDI) - Homo sapiens (Human)
5	0.732	0.482	3.015	GDIS_HUMAN	Rho GDP-dissociation inhibitor 2 (Rho GDI 2) (Rho-GDI beta) (Ly-GDI) - Homo sapiens (Human)
6	1.896	0.251	2.041	GDIS_HUMAN	Rho GDP-dissociation inhibitor 2 (Rho GDI 2) (Rho-GDI beta) (Ly-GDI) - Homo sapiens (Human)
2	0.707	0.256	5.307	GELS_HUMAN	Gelsolin precursor (Actin-depolymerizing factor) (ADF) (Brevin) (AGEL) - Homo sapiens (Human)
6	0.376	0.904	2.855	GELS_HUMAN	Gelsolin precursor (Actin-depolymerizing factor) (ADF) (Brevin) (AGEL) - Homo sapiens (Human)
6	0.611	0.404	3.931	GILT_HUMAN	Gamma-interferon-inducible lysosomal thiol reductase precursor (Gamma-interferon-inducible protein IP-30) - Homo sapiens (Human)
3	1.459	1.048	0.866	GLU2B_HUMAN	Glucosidase 2 subunit beta precursor (Glucosidase II subunit beta) (Protein kinase C substrate, 60.1 kDa protein, heavy chain) (PKCSH) (80K-H protein) - Homo sapiens (Human)
5	0.871	1.364	0.895	GLU2B_HUMAN	Glucosidase 2 subunit beta precursor (Glucosidase II subunit beta) (Protein kinase C substrate, 60.1 kDa protein, heavy chain) (PKCSH) (80K-H protein) - Homo sapiens (Human)
6	1.526	1.394	0.456	GLU2B_HUMAN	Glucosidase 2 subunit beta precursor (Glucosidase II subunit beta) (Protein kinase C substrate, 60.1 kDa protein, heavy chain) (PKCSH) (80K-H protein) - Homo sapiens (Human)
6	1.161	0.817	1.022	GMFG_HUMAN	Glia maturation factor gamma (GMF-gamma) - Homo sapiens (Human)
2	0.688	0.744	1.879	GRAN_HUMAN	Grancalcin - Homo sapiens (Human)
5	0.587	1.302	1.391	GRB2_HUMAN	Growth factor receptor-bound protein 2 (Adapter protein GRB2) (SH2/SH3 adapter GRB2) (Protein Ash) - Homo sapiens (Human)
3	1.348	0.772	1.272	GRP75_HUMAN	Stress-70 protein, mitochondrial precursor (75 kDa glucose-regulated protein) (GRP 75) (Peptide-binding protein 74) (PBP74) (Mortalin) (MOT) - Homo sapiens (Human)
4	1.066	1.947	0.457	GRP75_HUMAN	Stress-70 protein, mitochondrial precursor (75 kDa glucose-regulated protein) (GRP 75) (Peptide-binding protein 74) (PBP74) (Mortalin) (MOT) - Homo sapiens (Human)
5	0.823	1.355	0.954	GRP75_HUMAN	Stress-70 protein, mitochondrial precursor (75 kDa glucose-regulated protein) (GRP 75) (Peptide-binding protein 74) (PBP74) (Mortalin) (MOT) - Homo sapiens (Human)
6	1.05	1.025	0.96	GRP75_HUMAN	Stress-70 protein, mitochondrial precursor (75 kDa glucose-regulated protein) (GRP 75) (Peptide-binding protein 74) (PBP74) (Mortalin) (MOT) - Homo sapiens (Human)
1	0.891	0.84	1.291	GRP78_HUMAN	78 kDa glucose-regulated protein precursor (GRP 78) (Heat shock 70 kDa protein 5) (Immunoglobulin heavy chain-binding protein) (BiP) (Endoplasmic reticulum lumenal Ca(2+)-binding protein grp78) - Homo sapiens (Human)
5	1.301	0.823	0.993	GRP78_HUMAN	78 kDa glucose-regulated protein precursor (GRP 78) (Heat shock 70 kDa protein 5) (Immunoglobulin heavy chain-binding protein) (BiP) (Endoplasmic reticulum lumenal Ca(2+)-binding protein grp78) - Homo sapiens (Human)
6	1.176	0.788	1.047	GRP78_HUMAN	78 kDa glucose-regulated protein precursor (GRP 78) (Heat shock 70 kDa protein 5) (Immunoglobulin heavy chain-binding protein) (BiP) (Endoplasmic reticulum lumenal Ca(2+)-binding protein grp78) - Homo sapiens (Human)
1	−12.288	−0.043	1.84	GSTO1_HUMAN	Glutathione transferase omega-1 (EC 2.5.1.18) (GSTO 1-1) - Homo sapiens (Human)
2	1.088	0.906	0.976	GSTP1_HUMAN	Glutathione S-transferase P (EC 2.5.1.18) (GST class-pi) (GSTP1-1) - Homo sapiens (Human)
5	1.529	0.552	1.259	GSTP1_HUMAN	Glutathione S-transferase P (EC 2.5.1.18) (GST class-pi) (GSTP1-1) - Homo sapiens (Human)
1	1.564	0.645	0.936	H12_HUMAN	Histone H1.2 (Histone H1d) - Homo sapiens (Human)
2	0.94	1.429	0.717	H12_HUMAN	Histone H1.2 (Histone H1d) - Homo sapiens (Human)
3	2.497	0.749	0.709	H12_HUMAN	Histone H1.2 (Histone H1d) - Homo sapiens (Human)
4	1.299	1.164	0.627	H12_HUMAN	Histone H1.2 (Histone H1d) - Homo sapiens (Human)
5	0.897	1.718	0.717	H12_HUMAN	Histone H1.2 (Histone H1d) - Homo sapiens (Human)
6	0.265	1.081	3.287	H12_HUMAN	Histone H1.2 (Histone H1d) - Homo sapiens (Human)
1	1.581	0.538	1.136	H13_HUMAN	Histone H1.3 (Histone H1c) - Homo sapiens (Human)
2	0.901	1.425	0.75	H13_HUMAN	Histone H1.3 (Histone H1c) - Homo sapiens (Human)
3	1.796	0.464	1.588	H13_HUMAN	Histone H1.3 (Histone H1c) - Homo sapiens (Human)
4	1.316	1.032	0.698	H13_HUMAN	Histone H1.3 (Histone H1c) - Homo sapiens (Human)
5	1.034	1.456	0.734	H13_HUMAN	Histone H1.3 (Histone H1c) - Homo sapiens (Human)
6	0.275	0.96	3.646	H13_HUMAN	Histone H1.3 (Histone H1c) - Homo sapiens (Human)
2	0.905	1.427	0.745	H14_HUMAN	Histone H1.4 (Histone H1b) - Homo sapiens (Human)
4	1.25	1.148	0.661	H14_HUMAN	Histone H1.4 (Histone H1b) - Homo sapiens (Human)
5	0.976	1.525	0.744	H14_HUMAN	Histone H1.4 (Histone H1b) - Homo sapiens (Human)
6	0.293	0.996	3.329	H14_HUMAN	Histone H1.4 (Histone H1b) - Homo sapiens (Human)
1	1.938	0.524	0.955	H15_HUMAN	Histone H1.5 (Histone H1a) - Homo sapiens (Human)
2	0.44	1.504	1.464	H15_HUMAN	Histone H1.5 (Histone H1a) - Homo sapiens (Human)
3	1.244	0.6	1.773	H15_HUMAN	Histone H1.5 (Histone H1a) - Homo sapiens (Human)
4	1.499	0.894	0.511	H15_HUMAN	Histone H1.5 (Histone H1a) - Homo sapiens (Human)
5	1.01	1.614	0.655	H15_HUMAN	Histone H1.5 (Histone H1a) - Homo sapiens (Human)
6	0.364	0.977	2.63	H15_HUMAN	Histone H1.5 (Histone H1a) - Homo sapiens (Human)
2	1.665	1.174	0.5	H1X_HUMAN	Histone H1x - Homo sapiens (Human)
3	1.742	0.613	1.239	H1X_HUMAN	Histone H1x - Homo sapiens (Human)
4	1.101	1.672	0.515	H1X_HUMAN	Histone H1x - Homo sapiens (Human)
5	1.833	1.17	0.444	H1X_HUMAN	Histone H1x - Homo sapiens (Human)
6	0.459	1.333	1.584	H1X_HUMAN	Histone H1x - Homo sapiens (Human)
3	8.388	0.15	1.055	H2A1A_HUMAN	Histone H2A type 1-A - Homo sapiens (Human)
1	2.084	0.57	0.755	H2A1B_HUMAN	Histone H2A type 1-B - Homo sapiens (Human)
2	1.259	1.162	0.658	H2A1B_HUMAN	Histone H2A type 1-B - Homo sapiens (Human)
5	1.874	1.346	0.608	H2A1B_HUMAN	Histone H2A type 1-B - Homo sapiens (Human)
6	0.541	0.942	3.096	H2A1B_HUMAN	Histone H2A type 1-B - Homo sapiens (Human)
2	1.337	1.196	0.598	H2A1D_HUMAN	Histone H2A type 1-D (H2A.3) - Homo sapiens (Human)
4	1.64	0.901	0.642	H2A1D_HUMAN	Histone H2A type 1-D (H2A.3) - Homo sapiens (Human)
2	0.991	1.301	0.746	H2AV_HUMAN	Histone H2AV (H2A.F/Z) - Homo sapiens (Human)
4	1.688	0.86	0.653	H2AV_HUMAN	Histone H2AV (H2A.F/Z) - Homo sapiens (Human)
5	1.25	1.293	0.633	H2AV_HUMAN	Histone H2AV (H2A.F/Z) - Homo sapiens (Human)
6	0.657	0.44	3.359	H2AV_HUMAN	Histone H2AV (H2A.F/Z) - Homo sapiens (Human)
5	1.926	1.364	0.59	H2AX_HUMAN	Histone H2A.x (H2a/x) - Homo sapiens (Human)
6	0.519	0.953	3.049	H2AX_HUMAN	Histone H2A.x (H2a/x) - Homo sapiens (Human)
1	2.185	0.456	0.97	H2B1B_HUMAN	Histone H2B type 1-B (H2B.f) (H2B/f) (H2B.1) - Homo sapiens (Human)
4	1.65	0.809	0.71	H2B1B_HUMAN	Histone H2B type 1-B (H2B.f) (H2B/f) (H2B.1) - Homo sapiens (Human)
1	2.191	0.444	0.991	H2B1C_HUMAN	Histone H2B type 1-C/E/F/G/I (H2B.a/g/h/k/l) (H2B.1 A) (H2B/a) (H2B/g) (H2B/h) (H2B/k) (H2B/l) - Homo sapiens (Human)
3	3.714	0.358	0.995	H2B1C_HUMAN	Histone H2B type 1-C/E/F/G/I (H2B.a/g/h/k/l) (H2B.1 A) (H2B/a) (H2B/g) (H2B/h) (H2B/k) (H2B/l) - Homo sapiens (Human)
4	1.854	0.74	0.691	H2B1C_HUMAN	Histone H2B type 1-C/E/F/G/I (H2B.a/g/h/k/l) (H2B.1 A) (H2B/a) (H2B/g) (H2B/h) (H2B/k) (H2B/l) - Homo sapiens (Human)
2	1.08	1.525	0.584	H2B1D_HUMAN	Histone H2B type 1-D (H2B.b) (H2B/b) (H2B.1 B) (HIRA-interacting protein 2) - Homo sapiens (Human)
5	1.162	1.552	0.592	H2B1D_HUMAN	Histone H2B type 1-D (H2B.b) (H2B/b) (H2B.1 B) (HIRA-interacting protein 2) - Homo sapiens (Human)
6	1.072	0.53	1.93	H2B1D_HUMAN	Histone H2B type 1-D (H2B.b) (H2B/b) (H2B.1 B) (HIRA-interacting protein 2) - Homo sapiens (Human)
2	1.107	1.482	0.586	H2B1K_HUMAN	Histone H2B type 1-K (H2B K) (HIRA-interacting protein 1) - Homo sapiens (Human)
2	1.093	1.544	0.57	H2B1O_HUMAN	Histone H2B type 1-O (H2B.n) (H2B/n) (H2B.2) - Homo sapiens (Human)
5	1.152	1.423	0.639	H2B1O_HUMAN	Histone H2B type 1-O (H2B.n) (H2B/n) (H2B.2) - Homo sapiens (Human)
6	1.29	0.559	1.489	H2B1O_HUMAN	Histone H2B type 1-O (H2B.n) (H2B/n) (H2B.2) - Homo sapiens (Human)
1	3.227	0.475	0.63	H31T_HUMAN	Histone H3.1t (H3t) (H3/t) (H3/g) - Homo sapiens (Human)
3	8.199	0.358	0.452	H31T_HUMAN	Histone H3.1t (H3t) (H3/t) (H3/g) - Homo sapiens (Human)
5	5.819	0.713	0.256	H31T_HUMAN	Histone H3.1t (H3t) (H3/t) (H3/g) - Homo sapiens (Human)
6	0.035	1.401	18.76	H31T_HUMAN	Histone H3.1t (H3t) (H3/t) (H3/g) - Homo sapiens (Human)
2	1.172	1.454	0.565	H33_HUMAN	Histone H3.3 - Homo sapiens (Human)
5	7.533	−1.333	−0.106	H33_HUMAN	Histone H3.3 - Homo sapiens (Human)
6	0.183	1.164	3.927	H33_HUMAN	Histone H3.3 - Homo sapiens (Human)
1	1.759	0.74	0.792	H4_HUMAN	Histone H4 - Homo sapiens (Human)
2	1.422	1.396	0.485	H4_HUMAN	Histone H4 - Homo sapiens (Human)
3	6.311	0.191	1.097	H4_HUMAN	Histone H4 - Homo sapiens (Human)
4	1.736	0.841	0.649	H4_HUMAN	Histone H4 - Homo sapiens (Human)
5	3.256	0.818	0.49	H4_HUMAN	Histone H4 - Homo sapiens (Human)
6	0.228	0.759	6.071	H4_HUMAN	Histone H4 - Homo sapiens (Human)
1	0.979	0.112	8.807	HBA_HUMAN	Hemoglobin subunit alpha (Hemoglobin alpha chain) (Alpha-globin) - Homo sapiens (Human)
2	1.034	0.07	15.342	HBA_HUMAN	Hemoglobin subunit alpha (Hemoglobin alpha chain) (Alpha-globin) - Homo sapiens (Human)
3	1.886	0.204	3.434	HBA_HUMAN	Hemoglobin subunit alpha (Hemoglobin alpha chain) (Alpha-globin) - Homo sapiens (Human)
4	1.283	0.16	4.611	HBA_HUMAN	Hemoglobin subunit alpha (Hemoglobin alpha chain) (Alpha-globin) - Homo sapiens (Human)
5	1.873	0.083	9.938	HBA_HUMAN	Hemoglobin subunit alpha (Hemoglobin alpha chain) (Alpha-globin) - Homo sapiens (Human)
6	0.526	0.168	11.001	HBA_HUMAN	Hemoglobin subunit alpha (Hemoglobin alpha chain) (Alpha-globin) - Homo sapiens (Human)
1	0.924	0.1	10.409	HBB_HUMAN	Hemoglobin subunit beta (Hemoglobin beta chain) (Beta-globin) - Homo sapiens (Human)
2	0.864	0.063	19.108	HBB_HUMAN	Hemoglobin subunit beta (Hemoglobin beta chain) (Beta-globin) - Homo sapiens (Human)
3	0.324	0.054	75.137	HBB_HUMAN	Hemoglobin subunit beta (Hemoglobin beta chain) (Beta-globin) - Homo sapiens (Human)
4	1.134	0.083	10.206	HBB_HUMAN	Hemoglobin subunit beta (Hemoglobin beta chain) (Beta-globin) - Homo sapiens (Human)
5	−−−	0.009	15.221	HBB_HUMAN	Hemoglobin subunit beta (Hemoglobin beta chain) (Beta-globin) - Homo sapiens (Human)
6	1.973	0.049	10.133	HBB_HUMAN	Hemoglobin subunit beta (Hemoglobin beta chain) (Beta-globin) - Homo sapiens (Human)
6	0.809	1.754	0.684	HCC1_HUMAN	Nuclear protein Hcc-1 (Proliferation-associated cytokine-inducible protein CIP29) (Cytokine-induced protein of 29 kDa) - Homo sapiens (Human)
1	0.935	0.387	2.669	HCD2_HUMAN	3-hydroxyacyl-CoA dehydrogenase type-2 (EC 1.1.1.35) (3-hydroxyacyl-CoA dehydrogenase type II) (Type II HADH) (3-hydroxy-2-methylbutyryl-CoA dehydrogenase) (EC 1.1.1.178) (Endoplasmic reticulum-associated amyloid beta-peptide-binding protein) (Short
5	0.736	1.623	0.89	HCFC1_HUMAN	Host cell factor (HCF) (HCF-1) (C1 factor) (VP16 accessory protein) (VCAF) (CFF) [Contains: HCF N-terminal chain 1; HCF N-terminal chain 2; HCF N-terminal chain 3; HCF N-terminal chain 4; HCF N-terminal chain 5; HCF N-terminal chain 6; HCF C-termina
6	0.616	1.575	1	HCFC1_HUMAN	Host cell factor (HCF) (HCF-1) (C1 factor) (VP16 accessory protein) (VCAF) (CFF) [Contains: HCF N-terminal chain 1; HCF N-terminal chain 2; HCF N-terminal chain 3; HCF N-terminal chain 4; HCF N-terminal chain 5; HCF N-terminal chain 6; HCF C-termina
3	1.636	1.578	0.513	HCFC2_HUMAN	Host cell factor 2 (HCF-2) (C2 factor) - Homo sapiens (Human)
1	1.274	2.103	0.361	HCLS1_HUMAN	Hematopoietic lineage cell-specific protein (Hematopoietic cell-specific LYN substrate 1) (LckBP1) (p75) - Homo sapiens (Human)
3	0.34	1.668	2.338	HCLS1_HUMAN	Hematopoietic lineage cell-specific protein (Hematopoietic cell-specific LYN substrate 1) (LckBP1) (p75) - Homo sapiens (Human)
5	0.597	1.352	1.318	HCLS1_HUMAN	Hematopoietic lineage cell-specific protein (Hematopoietic cell-specific LYN substrate 1) (LckBP1) (p75) - Homo sapiens (Human)
6	2.188	0.606	0.732	HCLS1_HUMAN	Hematopoietic lineage cell-specific protein (Hematopoietic cell-specific LYN substrate 1) (LckBP1) (p75) - Homo sapiens (Human)
1	0.647	2.42	0.617	HDGF_HUMAN	Hepatoma-derived growth factor (HDGF) (High-mobility group protein 1-like 2) (HMG-1L2) - Homo sapiens (Human)
3	0.53	2.105	1.188	HDGF_HUMAN	Hepatoma-derived growth factor (HDGF) (High-mobility group protein 1-like 2) (HMG-1L2) - Homo sapiens (Human)
6	1.026	0.93	1.017	HDGF_HUMAN	Hepatoma-derived growth factor (HDGF) (High-mobility group protein 1-like 2) (HMG-1L2) - Homo sapiens (Human)
2	1.02	1	0.943	HECD3_HUMAN	Probable E3 ubiquitin-protein ligase HECTD3 (HECT domain-containing protein 3) - Homo sapiens (Human)
6	1.355	0.57	1.256	HECD3_HUMAN	Probable E3 ubiquitin-protein ligase HECTD3 (HECT domain-containing protein 3) - Homo sapiens (Human)
3	1.929	0.557	1.232	HG2A_HUMAN	HLA class II histocompatibility antigen gamma chain (HLA-DR antigens-associated invariant chain) (Ia antigen-associated invariant chain) (Ii) (p33) (CD74 antigen) - Homo sapiens (Human)
1	0.813	1.434	0.829	HINT1_HUMAN	Histidine triad nucleotide-binding protein 1 (Adenosine 5~-monophosphoramidase) (Protein kinase C inhibitor 1) (Protein kinase C-interacting protein 1) (PKCI-1) - Homo sapiens (Human)
6	2.979	0.449	0.725	HINT1_HUMAN	Histidine triad nucleotide-binding protein 1 (Adenosine 5~-monophosphoramidase) (Protein kinase C inhibitor 1) (Protein kinase C-interacting protein 1) (PKCI-1) - Homo sapiens (Human)
6	0.827	1.283	0.914	HINT2_HUMAN	Histidine triad nucleotide-binding protein 2 (EC 3.-.-.-) (HINT-2) (HINT-3) (HIT-17kDa) (PKCI-1-related HIT protein) - Homo sapiens (Human)
2	1.138	1.027	0.823	HMG1X_HUMAN	High mobility group protein 1-like 10 (HMG-1L10) - Homo sapiens (Human)
6	17.644	0.108	0.51	HMG1X_HUMAN	High mobility group protein 1-like 10 (HMG-1L10) - Homo sapiens (Human)
1	1.808	0.242	2.208	HMGA1_HUMAN	High mobility group protein HMG-I/HMG-Y (HMG-I(Y)) (High mobility group AT-hook protein 1) (High mobility group protein A1) (High mobility group protein-R) - Homo sapiens (Human)
2	1.97	0.959	0.509	HMGA1_HUMAN	High mobility group protein HMG-I/HMG-Y (HMG-I(Y)) (High mobility group AT-hook protein 1) (High mobility group protein A1) (High mobility group protein-R) - Homo sapiens (Human)
5	3.223	0.741	0.445	HMGA1_HUMAN	High mobility group protein HMG-I/HMG-Y (HMG-I(Y)) (High mobility group AT-hook protein 1) (High mobility group protein A1) (High mobility group protein-R) - Homo sapiens (Human)
6	0.268	0.686	5.841	HMGA1_HUMAN	High mobility group protein HMG-I/HMG-Y (HMG-I(Y)) (High mobility group AT-hook protein 1) (High mobility group protein A1) (High mobility group protein-R) - Homo sapiens (Human)
1	1.005	0.872	1.102	HMGB1_HUMAN	High mobility group protein B1 (High mobility group protein 1) (HMG-1) - Homo sapiens (Human)
5	1.247	0.925	0.922	HMGB1_HUMAN	High mobility group protein B1 (High mobility group protein 1) (HMG-1) - Homo sapiens (Human)
1	1.43	0.724	0.933	HMGB2_HUMAN	High mobility group protein B2 (High mobility group protein 2) (HMG-2) - Homo sapiens (Human)
4	1.562	0.633	0.958	HMGN1_HUMAN	Nonhistone chromosomal protein HMG-14 (High-mobility group nucleosome-binding domain-containing protein 1) - Homo sapiens (Human)
5	1.857	1.06	0.54	HMGN1_HUMAN	Nonhistone chromosomal protein HMG-14 (High-mobility group nucleosome-binding domain-containing protein 1) - Homo sapiens (Human)
6	0.306	0.542	5.842	HMGN1_HUMAN	Nonhistone chromosomal protein HMG-14 (High-mobility group nucleosome-binding domain-containing protein 1) - Homo sapiens (Human)
2	0.85	1.114	1.017	HMGN2_HUMAN	Nonhistone chromosomal protein HMG-17 (High-mobility group nucleosome-binding domain-containing protein 2) - Homo sapiens (Human)
5	7.05	−1.427	−0.106	HMGN2_HUMAN	Nonhistone chromosomal protein HMG-17 (High-mobility group nucleosome-binding domain-containing protein 2) - Homo sapiens (Human)
6	−0.057	1.408	−12.108	HMGN2_HUMAN	Nonhistone chromosomal protein HMG-17 (High-mobility group nucleosome-binding domain-containing protein 2) - Homo sapiens (Human)
4	1.655	0.771	0.743	HMGN4_HUMAN	High-mobility group nucleosome-binding domain-containing protein 4 (Nonhistone chromosomal protein HMG-17-like 3) (Non-histone chromosomal protein) - Homo sapiens (Human)
3	0.675	2.875	0.683	HNRH1_HUMAN	Heterogeneous nuclear ribonucleoprotein H (hnRNP H) - Homo sapiens (Human)
6	0.748	1.958	0.663	HNRH1_HUMAN	Heterogeneous nuclear ribonucleoprotein H (hnRNP H) - Homo sapiens (Human)
3	1.555	1.927	0.442	HNRH2_HUMAN	Heterogeneous nuclear ribonucleoprotein H~ (hnRNP H~) (FTP-3) - Homo sapiens (Human)
1	1.177	1.6	0.511	HNRPC_HUMAN	Heterogeneous nuclear ribonucleoproteins C1/C2 (hnRNP C1 / hnRNP C2) - Homo sapiens (Human)
2	0.794	1.131	1.07	HNRPC_HUMAN	Heterogeneous nuclear ribonucleoproteins C1/C2 (hnRNP C1 / hnRNP C2) - Homo sapiens (Human)
3	0.688	2.317	0.838	HNRPC_HUMAN	Heterogeneous nuclear ribonucleoproteins C1/C2 (hnRNP C1 / hnRNP C2) - Homo sapiens (Human)
5	0.781	1.791	0.76	HNRPC_HUMAN	Heterogeneous nuclear ribonucleoproteins C1/C2 (hnRNP C1 / hnRNP C2) - Homo sapiens (Human)
6	1.31	1.141	0.649	HNRPC_HUMAN	Heterogeneous nuclear ribonucleoproteins C1/C2 (hnRNP C1 / hnRNP C2) - Homo sapiens (Human)
1	0.873	2.026	0.546	HNRPD_HUMAN	Heterogeneous nuclear ribonucleoprotein D0 (hnRNP D0) (AU-rich element RNA-binding protein 1) - Homo sapiens (Human)
4	0.865	2.931	0.373	HNRPD_HUMAN	Heterogeneous nuclear ribonucleoprotein D0 (hnRNP D0) (AU-rich element RNA-binding protein 1) - Homo sapiens (Human)
5	0.92	1.935	0.598	HNRPD_HUMAN	Heterogeneous nuclear ribonucleoprotein D0 (hnRNP D0) (AU-rich element RNA-binding protein 1) - Homo sapiens (Human)
6	0.539	2.71	0.665	HNRPD_HUMAN	Heterogeneous nuclear ribonucleoprotein D0 (hnRNP D0) (AU-rich element RNA-binding protein 1) - Homo sapiens (Human)
3	0.952	1.59	0.876	HNRPF_HUMAN	Heterogeneous nuclear ribonucleoprotein F (hnRNP F) (Nucleolin-like protein mcs94-1) - Homo sapiens (Human)
5	0.608	2.781	0.629	HNRPF_HUMAN	Heterogeneous nuclear ribonucleoprotein F (hnRNP F) (Nucleolin-like protein mcs94-1) - Homo sapiens (Human)
6	0.721	1.305	0.869	HNRPF_HUMAN	Heterogeneous nuclear ribonucleoprotein F (hnRNP F) (Nucleolin-like protein mcs94-1) - Homo sapiens (Human)
1	0.841	1.468	0.783	HNRPG_HUMAN	Heterogeneous nuclear ribonucleoprotein G (hnRNP G) (RNA-binding motif protein, X chromosome) (Glycoprotein p43) - Homo sapiens (Human)
2	0.331	1.75	1.662	HNRPG_HUMAN	Heterogeneous nuclear ribonucleoprotein G (hnRNP G) (RNA-binding motif protein, X chromosome) (Glycoprotein p43) - Homo sapiens (Human)
3	1.323	2.012	0.476	HNRPG_HUMAN	Heterogeneous nuclear ribonucleoprotein G (hnRNP G) (RNA-binding motif protein, X chromosome) (Glycoprotein p43) - Homo sapiens (Human)
5	0.852	2.621	0.476	HNRPG_HUMAN	Heterogeneous nuclear ribonucleoprotein G (hnRNP G) (RNA-binding motif protein, X chromosome) (Glycoprotein p43) - Homo sapiens (Human)
6	1.293	1.399	0.536	HNRPG_HUMAN	Heterogeneous nuclear ribonucleoprotein G (hnRNP G) (RNA-binding motif protein, X chromosome) (Glycoprotein p43) - Homo sapiens (Human)
1	0.9	1.249	0.859	HNRPK_HUMAN	Heterogeneous nuclear ribonucleoprotein K (hnRNP K) (Transformation up-regulated nuclear protein) (TUNP) - Homo sapiens (Human)
2	0.933	1.313	0.786	HNRPK_HUMAN	Heterogeneous nuclear ribonucleoprotein K (hnRNP K) (Transformation up-regulated nuclear protein) (TUNP) - Homo sapiens (Human)
3	0.923	2.352	0.74	HNRPK_HUMAN	Heterogeneous nuclear ribonucleoprotein K (hnRNP K) (Transformation up-regulated nuclear protein) (TUNP) - Homo sapiens (Human)
4	0.917	1.145	0.903	HNRPK_HUMAN	Heterogeneous nuclear ribonucleoprotein K (hnRNP K) (Transformation up-regulated nuclear protein) (TUNP) - Homo sapiens (Human)
5	0.822	1.724	0.75	HNRPK_HUMAN	Heterogeneous nuclear ribonucleoprotein K (hnRNP K) (Transformation up-regulated nuclear protein) (TUNP) - Homo sapiens (Human)
6	0.781	1.116	1.114	HNRPK_HUMAN	Heterogeneous nuclear ribonucleoprotein K (hnRNP K) (Transformation up-regulated nuclear protein) (TUNP) - Homo sapiens (Human)
2	0.661	1.473	0.988	HNRPL_HUMAN	Heterogeneous nuclear ribonucleoprotein L (hnRNP L) - Homo sapiens (Human)
3	0.99	2.478	0.54	HNRPL_HUMAN	Heterogeneous nuclear ribonucleoprotein L (hnRNP L) - Homo sapiens (Human)
5	1.025	1.937	0.535	HNRPL_HUMAN	Heterogeneous nuclear ribonucleoprotein L (hnRNP L) - Homo sapiens (Human)
6	0.294	2.503	1.319	HNRPL_HUMAN	Heterogeneous nuclear ribonucleoprotein L (hnRNP L) - Homo sapiens (Human)
1	1.065	1.103	0.823	HNRPM_HUMAN	Heterogeneous nuclear ribonucleoprotein M (hnRNP M) - Homo sapiens (Human)
2	0.832	1.073	1.077	HNRPM_HUMAN	Heterogeneous nuclear ribonucleoprotein M (hnRNP M) - Homo sapiens (Human)
3	1.313	1.748	0.584	HNRPM_HUMAN	Heterogeneous nuclear ribonucleoprotein M (hnRNP M) - Homo sapiens (Human)
5	0.916	1.803	0.643	HNRPM_HUMAN	Heterogeneous nuclear ribonucleoprotein M (hnRNP M) - Homo sapiens (Human)
6	0.715	1.222	1.11	HNRPM_HUMAN	Heterogeneous nuclear ribonucleoprotein M (hnRNP M) - Homo sapiens (Human)
1	0.706	1.729	0.792	HNRPR_HUMAN	Heterogeneous nuclear ribonucleoprotein R (hnRNP R) - Homo sapiens (Human)
5	1.059	1.977	0.508	HNRPR_HUMAN	Heterogeneous nuclear ribonucleoprotein R (hnRNP R) - Homo sapiens (Human)
1	1.014	1.674	0.569	HNRPU_HUMAN	Heterogeneous nuclear ribonucleoprotein U (hnRNP U) (Scaffold attachment factor A) (SAF-A) (p120) (pp120) - Homo sapiens (Human)
3	0.72	2.186	0.841	HNRPU_HUMAN	Heterogeneous nuclear ribonucleoprotein U (hnRNP U) (Scaffold attachment factor A) (SAF-A) (p120) (pp120) - Homo sapiens (Human)
5	0.816	2.04	0.629	HNRPU_HUMAN	Heterogeneous nuclear ribonucleoprotein U (hnRNP U) (Scaffold attachment factor A) (SAF-A) (p120) (pp120) - Homo sapiens (Human)
6	0.67	1.758	0.824	HNRPU_HUMAN	Heterogeneous nuclear ribonucleoprotein U (hnRNP U) (Scaffold attachment factor A) (SAF-A) (p120) (pp120) - Homo sapiens (Human)
5	0.792	1.282	1.047	HS70L_HUMAN	Heat shock 70 kDa protein 1L (Heat shock 70 kDa protein 1-like) (Heat shock 70 kDa protein 1-Hom) (HSP70-Hom) - Homo sapiens (Human)
3	1.595	1.103	0.753	HS90A_HUMAN	Heat shock protein HSP 90-alpha (HSP 86) (Renal carcinoma antigen NY-REN-38) - Homo sapiens (Human)
5	0.825	1.535	0.84	HS90A_HUMAN	Heat shock protein HSP 90-alpha (HSP 86) (Renal carcinoma antigen NY-REN-38) - Homo sapiens (Human)
6	0.656	1.067	1.387	HS90A_HUMAN	Heat shock protein HSP 90-alpha (HSP 86) (Renal carcinoma antigen NY-REN-38) - Homo sapiens (Human)
1	1.005	1.258	0.764	HS90B_HUMAN	Heat shock protein HSP 90-beta (HSP 84) (HSP 90) - Homo sapiens (Human)
3	1.835	0.981	0.736	HS90B_HUMAN	Heat shock protein HSP 90-beta (HSP 84) (HSP 90) - Homo sapiens (Human)
5	0.924	1.213	0.949	HS90B_HUMAN	Heat shock protein HSP 90-beta (HSP 84) (HSP 90) - Homo sapiens (Human)
6	0.49	0.993	1.993	HS90B_HUMAN	Heat shock protein HSP 90-beta (HSP 84) (HSP 90) - Homo sapiens (Human)
3	1.121	0.35	3.372	HSP71_HUMAN	Heat shock 70 kDa protein 1 (HSP70.1) (HSP70-1/HSP70-2) - Homo sapiens (Human)
6	0.7	1.34	1.034	HSP71_HUMAN	Heat shock 70 kDa protein 1 (HSP70.1) (HSP70-1/HSP70-2) - Homo sapiens (Human)
1	0.838	1.265	0.912	HSP7C_HUMAN	Heat shock cognate 71 kDa protein (Heat shock 70 kDa protein 8) - Homo sapiens (Human)
2	0.704	1.142	1.197	HSP7C_HUMAN	Heat shock cognate 71 kDa protein (Heat shock 70 kDa protein 8) - Homo sapiens (Human)
3	1.004	0.441	2.996	HSP7C_HUMAN	Heat shock cognate 71 kDa protein (Heat shock 70 kDa protein 8) - Homo sapiens (Human)
5	0.787	1.295	1.043	HSP7C_HUMAN	Heat shock cognate 71 kDa protein (Heat shock 70 kDa protein 8) - Homo sapiens (Human)
6	0.633	1.462	1.045	HSP7C_HUMAN	Heat shock cognate 71 kDa protein (Heat shock 70 kDa protein 8) - Homo sapiens (Human)
6	1.424	0.984	0.692	ICAL_HUMAN	Calpastatin (Calpain inhibitor) (Sperm BS-17 component) - Homo sapiens (Human)
3	1.383	0.633	1.512	IDH3A_HUMAN	Isocitrate dehydrogenase [NAD] subunit alpha, mitochondrial precursor (EC 1.1.1.41) (Isocitric dehydrogenase) (NAD(+)-specific ICDH) - Homo sapiens (Human)
6	1.056	1.003	0.916	IDH3A_HUMAN	Isocitrate dehydrogenase [NAD] subunit alpha, mitochondrial precursor (EC 1.1.1.41) (Isocitric dehydrogenase) (NAD(+)-specific ICDH) - Homo sapiens (Human)
6	3.292	0.39	0.756	IDHC_HUMAN	Isocitrate dehydrogenase [NADP] cytoplasmic (EC 1.1.1.42) (Cytosolic NADP-isocitrate dehydrogenase) (Oxalosuccinate decarboxylase) (IDH) (NADP(+)-specific ICDH) (IDP) - Homo sapiens (Human)
2	0.678	0.987	1.438	IDHP_HUMAN	Isocitrate dehydrogenase [NADP], mitochondrial precursor (EC 1.1.1.42) (Oxalosuccinate decarboxylase) (IDH) (NADP(+)-specific ICDH) (IDP) (ICD-M) - Homo sapiens (Human)
4	1.08	1.085	0.809	IDHP_HUMAN	Isocitrate dehydrogenase [NADP], mitochondrial precursor (EC 1.1.1.42) (Oxalosuccinate decarboxylase) (IDH) (NADP(+)-specific ICDH) (IDP) (ICD-M) - Homo sapiens (Human)
5	2.039	0.462	1.129	IDHP_HUMAN	Isocitrate dehydrogenase [NADP], mitochondrial precursor (EC 1.1.1.42) (Oxalosuccinate decarboxylase) (IDH) (NADP(+)-specific ICDH) (IDP) (ICD-M) - Homo sapiens (Human)
6	0.993	0.395	2.475	IDHP_HUMAN	Isocitrate dehydrogenase [NADP], mitochondrial precursor (EC 1.1.1.42) (Oxalosuccinate decarboxylase) (IDH) (NADP(+)-specific ICDH) (IDP) (ICD-M) - Homo sapiens (Human)
2	0.792	0.943	1.287	IF38_HUMAN	Eukaryotic translation initiation factor 3 subunit 8 (eIF3 p110) (eIF3c) - Homo sapiens (Human)
6	2.089	0.606	0.767	IF3A_HUMAN	Eukaryotic translation initiation factor 3 subunit 10 (eIF-3 theta) (eIF3 p167) (eIF3 p180) (eIF3 p185) (eIF3a) - Homo sapiens (Human)
2	−10.318	−0.052	1.787	IF4H_HUMAN	Eukaryotic translation initiation factor 4H (eIF-4H) (Williams-Beuren syndrome chromosome region 1 protein) - Homo sapiens (Human)
6	2.248	0.374	1.153	IF4H_HUMAN	Eukaryotic translation initiation factor 4H (eIF-4H) (Williams-Beuren syndrome chromosome region 1 protein) - Homo sapiens (Human)
1	0.631	1.607	0.953	IF5A1_HUMAN	Eukaryotic translation initiation factor 5A-1 (eIF-5A-1) (eIF-5A1) (Eukaryotic initiation factor 5A isoform 1) (eIF-5A) (eIF-4D) (Rev-binding factor) - Homo sapiens (Human)
3	0.421	5.373	0.586	IF5A1_HUMAN	Eukaryotic translation initiation factor 5A-1 (eIF-5A-1) (eIF-5A1) (Eukaryotic initiation factor 5A isoform 1) (eIF-5A) (eIF-4D) (Rev-binding factor) - Homo sapiens (Human)
3	1.009	1.197	1.097	IL16_HUMAN	Interleukin-16 precursor (IL-16) (Lymphocyte chemoattractant factor) (LCF) - Homo sapiens (Human)
5	1.934	0.611	0.9	ILF2_HUMAN	Interleukin enhancer-binding factor 2 (Nuclear factor of activated T-cells 45 kDa) - Homo sapiens (Human)
2	0.842	1.657	0.689	ILF3_HUMAN	Interleukin enhancer-binding factor 3 (Nuclear factor of activated T-cells 90 kDa) (NF-AT-90) (Double-stranded RNA-binding protein 76) (DRBP76) (Translational control protein 80) (TCP80) (Nuclear factor associated with dsRNA) (NFAR) (M-phase phospho
3	0.916	3.149	0.459	ILF3_HUMAN	Interleukin enhancer-binding factor 3 (Nuclear factor of activated T-cells 90 kDa) (NF-AT-90) (Double-stranded RNA-binding protein 76) (DRBP76) (Translational control protein 80) (TCP80) (Nuclear factor associated with dsRNA) (NFAR) (M-phase phospho
5	0.856	2.515	0.494	ILF3_HUMAN	Interleukin enhancer-binding factor 3 (Nuclear factor of activated T-cells 90 kDa) (NF-AT-90) (Double-stranded RNA-binding protein 76) (DRBP76) (Translational control protein 80) (TCP80) (Nuclear factor associated with dsRNA) (NFAR) (M-phase phospho
3	1.168	0.632	1.794	IMB1_HUMAN	Importin beta-1 subunit (Karyopherin beta-1 subunit) (Nuclear factor P97) (Importin 90) - Homo sapiens (Human)
6	3.2	0.324	0.935	IMB1_HUMAN	Importin beta-1 subunit (Karyopherin beta-1 subunit) (Nuclear factor P97) (Importin 90) - Homo sapiens (Human)
2	0.718	0.832	1.609	INT5_HUMAN	Integrator complex subunit 5 (Int5) - Homo sapiens (Human)
2	1.022	0.961	0.979	IQGA1_HUMAN	Ras GTPase-activating-like protein IQGAP1 (p195) - Homo sapiens (Human)
2	0.574	0.333	5.034	ITA2B_HUMAN	Integrin alpha-IIb precursor (Platelet membrane glycoprotein IIb) (GPalpha IIb) (GPIIb) (CD41 antigen) [Contains: Integrin alpha-IIb heavy chain; Integrin alpha-IIb light chain] - Homo sapiens (Human)
3	1.141	0.202	5.74	ITA2B_HUMAN	Integrin alpha-IIb precursor (Platelet membrane glycoprotein IIb) (GPalpha IIb) (GPIIb) (CD41 antigen) [Contains: Integrin alpha-IIb heavy chain; Integrin alpha-IIb light chain] - Homo sapiens (Human)
2	1.257	0.982	0.779	ITAM_HUMAN	Integrin alpha-M precursor (Cell surface glycoprotein MAC-1 alpha subunit) (CR-3 alpha chain) (Leukocyte adhesion receptor MO1) (Neutrophil adherence receptor) (CD11b antigen) - Homo sapiens (Human)
2	0.84	0.72	1.59	ITPA_HUMAN	Inosine triphosphate pyrophosphatase (EC 3.6.1.19) (ITPase) (Inosine triphosphatase) (Putative oncogene protein hlc14-06-p) - Homo sapiens (Human)
1	−0.023	1.339	−31.667	IVD_HUMAN	Isovaleryl-CoA dehydrogenase, mitochondrial precursor (EC 1.3.99.10) (IVD) - Homo sapiens (Human)
5	1.55	0.401	1.711	K1967_HUMAN	Protein KIAA1967 (Deleted in breast cancer gene 1 protein) (DBC.1) (DBC-1) (p30 DBC) - Homo sapiens (Human)
6	1.575	1.105	0.557	K1967_HUMAN	Protein KIAA1967 (Deleted in breast cancer gene 1 protein) (DBC.1) (DBC-1) (p30 DBC) - Homo sapiens (Human)
5	1.629	0.304	2.144	K1C9_HUMAN	Keratin, type I cytoskeletal 9 (Cytokeratin-9) (CK-9) (Keratin-9) (K9) - Homo sapiens (Human)
6	−−−	−−−	−−−	K1C9_HUMAN	Keratin, type I cytoskeletal 9 (Cytokeratin-9) (CK-9) (Keratin-9) (K9) - Homo sapiens (Human)
1	0.859	0.862	1.304	K2C1_HUMAN	Keratin, type II cytoskeletal 1 (Cytokeratin-1) (CK-1) (Keratin-1) (K1) (67 kDa cytokeratin) (Hair alpha protein) - Homo sapiens (Human)
6	1.355	1.399	−−−	K2C1_HUMAN	Keratin, type II cytoskeletal 1 (Cytokeratin-1) (CK-1) (Keratin-1) (K1) (67 kDa cytokeratin) (Hair alpha protein) - Homo sapiens (Human)
6	0.757	1.76	0.728	K6PF_HUMAN	6-phosphofructokinase, muscle type (EC 2.7.1.11) (Phosphofructokinase 1) (Phosphohexokinase) (Phosphofructo-1-kinase isozyme A) (PFK-A) (Phosphofructokinase-M) - Homo sapiens (Human)
2	0.77	0.974	1.283	KAD2_HUMAN	Adenylate kinase isoenzyme 2, mitochondrial (EC 2.7.4.3) (ATP-AMP transphosphorylase) - Homo sapiens (Human)
5	1.404	0.924	0.819	KAD2_HUMAN	Adenylate kinase isoenzyme 2, mitochondrial (EC 2.7.4.3) (ATP-AMP transphosphorylase) - Homo sapiens (Human)
6	0.54	1.623	1.107	KAD2_HUMAN	Adenylate kinase isoenzyme 2, mitochondrial (EC 2.7.4.3) (ATP-AMP transphosphorylase) - Homo sapiens (Human)
3	1.433	1.391	0.664	KAT_HUMAN	Putative thiosulfate sulfurtransferase KAT (EC 2.8.1.1) - Homo sapiens (Human)
5	0.984	1.042	1.037	KAT_HUMAN	Putative thiosulfate sulfurtransferase KAT (EC 2.8.1.1) - Homo sapiens (Human)
5	0.565	0.939	2.001	KCC2A_HUMAN	Calcium/calmodulin-dependent protein kinase type II alpha chain (EC 2.7.11.17) (CaM-kinase II alpha chain) (CaM kinase II alpha subunit) (CaMK-II subunit alpha) - Homo sapiens (Human)
6	0.652	1.708	0.871	KCC2B_HUMAN	Calcium/calmodulin-dependent protein kinase type II beta chain (EC 2.7.11.17) (CaM-kinase II beta chain) (CaM kinase II subunit beta) (CaMK-II subunit beta) - Homo sapiens (Human)
2	1.427	0.669	1.008	KCY_HUMAN	UMP-CMP kinase (EC 2.7.4.14) (Cytidylate kinase) (Deoxycytidylate kinase) (Cytidine monophosphate kinase) (Uridine monophosphate/cytidine monophosphate kinase) (UMP/CMP kinase) (UMP/CMPK) (Uridine monophosphate kinase) - Homo sapiens (Human)
5	0.915	0.739	1.573	KCY_HUMAN	UMP-CMP kinase (EC 2.7.4.14) (Cytidylate kinase) (Deoxycytidylate kinase) (Cytidine monophosphate kinase) (Uridine monophosphate/cytidine monophosphate kinase) (UMP/CMP kinase) (UMP/CMPK) (Uridine monophosphate kinase) - Homo sapiens (Human)
6	2.426	0.301	1.331	KCY_HUMAN	UMP-CMP kinase (EC 2.7.4.14) (Cytidylate kinase) (Deoxycytidylate kinase) (Cytidine monophosphate kinase) (Uridine monophosphate/cytidine monophosphate kinase) (UMP/CMP kinase) (UMP/CMPK) (Uridine monophosphate kinase) - Homo sapiens (Human)
1	0.986	1.341	0.731	KPYM_HUMAN	Pyruvate kinase isozymes M1/M2 (EC 2.7.1.40) (Pyruvate kinase muscle isozyme) (Pyruvate kinase 2/3) (Cytosolic thyroid hormone-binding protein) (CTHBP) (THBP1) - Homo sapiens (Human)
3	1.506	1.121	0.784	KPYM_HUMAN	Pyruvate kinase isozymes M1/M2 (EC 2.7.1.40) (Pyruvate kinase muscle isozyme) (Pyruvate kinase 2/3) (Cytosolic thyroid hormone-binding protein) (CTHBP) (THBP1) - Homo sapiens (Human)
5	1.243	0.605	1.412	KPYM_HUMAN	Pyruvate kinase isozymes M1/M2 (EC 2.7.1.40) (Pyruvate kinase muscle isozyme) (Pyruvate kinase 2/3) (Cytosolic thyroid hormone-binding protein) (CTHBP) (THBP1) - Homo sapiens (Human)
1	−0.023	2.326	−18.299	KU70_HUMAN	ATP-dependent DNA helicase 2 subunit 1 (ATP-dependent DNA helicase II 70 kDa subunit) (Lupus Ku autoantigen protein p70) (Ku70) (70 kDa subunit of Ku antigen) (Thyroid-lupus autoantigen) (TLAA) (CTC box-binding factor 75 kDa subunit) (CTCBF) (CTC75)
2	0.695	1.282	1.08	KU70_HUMAN	ATP-dependent DNA helicase 2 subunit 1 (ATP-dependent DNA helicase II 70 kDa subunit) (Lupus Ku autoantigen protein p70) (Ku70) (70 kDa subunit of Ku antigen) (Thyroid-lupus autoantigen) (TLAA) (CTC box-binding factor 75 kDa subunit) (CTCBF) (CTC75)
5	1.525	2.767	0.252	KU70_HUMAN	ATP-dependent DNA helicase 2 subunit 1 (ATP-dependent DNA helicase II 70 kDa subunit) (Lupus Ku autoantigen protein p70) (Ku70) (70 kDa subunit of Ku antigen) (Thyroid-lupus autoantigen) (TLAA) (CTC box-binding factor 75 kDa subunit) (CTCBF) (CTC75)
6	0.144	2.638	2.553	KU70_HUMAN	ATP-dependent DNA helicase 2 subunit 1 (ATP-dependent DNA helicase II 70 kDa subunit) (Lupus Ku autoantigen protein p70) (Ku70) (70 kDa subunit of Ku antigen) (Thyroid-lupus autoantigen) (TLAA) (CTC box-binding factor 75 kDa subunit) (CTCBF) (CTC75)
1	1.084	0.672	1.326	KU86_HUMAN	ATP-dependent DNA helicase 2 subunit 2 (EC 3.6.1.-) (ATP-dependent DNA helicase II 80 kDa subunit) (Lupus Ku autoantigen protein p86) (Ku86) (Ku80) (86 kDa subunit of Ku antigen) (Thyroid-lupus autoantigen) (TLAA) (CTC box-binding factor 85 kDa subu
2	0.825	1.285	0.908	KU86_HUMAN	ATP-dependent DNA helicase 2 subunit 2 (EC 3.6.1.-) (ATP-dependent DNA helicase II 80 kDa subunit) (Lupus Ku autoantigen protein p86) (Ku86) (Ku80) (86 kDa subunit of Ku antigen) (Thyroid-lupus autoantigen) (TLAA) (CTC box-binding factor 85 kDa subu
3	1.38	1.734	0.554	KU86_HUMAN	ATP-dependent DNA helicase 2 subunit 2 (EC 3.6.1.-) (ATP-dependent DNA helicase II 80 kDa subunit) (Lupus Ku autoantigen protein p86) (Ku86) (Ku80) (86 kDa subunit of Ku antigen) (Thyroid-lupus autoantigen) (TLAA) (CTC box-binding factor 85 kDa subu
4	0.932	−8.862	−0.115	KU86_HUMAN	ATP-dependent DNA helicase 2 subunit 2 (EC 3.6.1.-) (ATP-dependent DNA helicase II 80 kDa subunit) (Lupus Ku autoantigen protein p86) (Ku86) (Ku80) (86 kDa subunit of Ku antigen) (Thyroid-lupus autoantigen) (TLAA) (CTC box-binding factor 85 kDa subu
5	0.852	1.75	0.713	KU86_HUMAN	ATP-dependent DNA helicase 2 subunit 2 (EC 3.6.1.-) (ATP-dependent DNA helicase II 80 kDa subunit) (Lupus Ku autoantigen protein p86) (Ku86) (Ku80) (86 kDa subunit of Ku antigen) (Thyroid-lupus autoantigen) (TLAA) (CTC box-binding factor 85 kDa subu
6	1.044	1.528	0.608	KU86_HUMAN	ATP-dependent DNA helicase 2 subunit 2 (EC 3.6.1.-) (ATP-dependent DNA helicase II 80 kDa subunit) (Lupus Ku autoantigen protein p86) (Ku86) (Ku80) (86 kDa subunit of Ku antigen) (Thyroid-lupus autoantigen) (TLAA) (CTC box-binding factor 85 kDa subu
5	2.184	0.553	0.88	LAC_HUMAN	Ig lambda chain C regions - Homo sapiens (Human)
6	−0.113	1.025	−8.398	LAC_HUMAN	Ig lambda chain C regions - Homo sapiens (Human)
1	1.186	0.746	1.092	LAP2A_HUMAN	Lamina-associated polypeptide 2 isoform alpha (Thymopoietin isoform alpha) (TP alpha) (Thymopoietin-related peptide isoform alpha) (TPRP isoform alpha) [Contains: Thymopoietin (TP) (Splenin); Thymopentin (TP5)] - Homo sapiens (Human)
2	0.926	1.363	0.763	LAP2B_HUMAN	Lamina-associated polypeptide 2, isoforms beta/gamma (Thymopoietin, isoforms beta/gamma) (TP beta/gamma) (Thymopoietin-related peptide isoforms beta/gamma) (TPRP isoforms beta/gamma) [Contains: Thymopoietin (TP) (Splenin); Thymopentin (TP5)] - Homo
4	1.535	1.059	0.583	LAP2B_HUMAN	Lamina-associated polypeptide 2, isoforms beta/gamma (Thymopoietin, isoforms beta/gamma) (TP beta/gamma) (Thymopoietin-related peptide isoforms beta/gamma) (TPRP isoforms beta/gamma) [Contains: Thymopoietin (TP) (Splenin); Thymopentin (TP5)] - Homo
5	1.642	1.096	0.591	LAP2B_HUMAN	Lamina-associated polypeptide 2, isoforms beta/gamma (Thymopoietin, isoforms beta/gamma) (TP beta/gamma) (Thymopoietin-related peptide isoforms beta/gamma) (TPRP isoforms beta/gamma) [Contains: Thymopoietin (TP) (Splenin); Thymopentin (TP5)] - Homo
6	0.526	0.866	2.13	LAP2B_HUMAN	Lamina-associated polypeptide 2, isoforms beta/gamma (Thymopoietin, isoforms beta/gamma) (TP beta/gamma) (Thymopoietin-related peptide isoforms beta/gamma) (TPRP isoforms beta/gamma) [Contains: Thymopoietin (TP) (Splenin); Thymopentin (TP5)] - Homo
2	0.843	0.66	1.73	LASP1_HUMAN	LIM and SH3 domain protein 1 (LASP-1) (MLN 50) - Homo sapiens (Human)
5	1.134	0.853	1.1	LASP1_HUMAN	LIM and SH3 domain protein 1 (LASP-1) (MLN 50) - Homo sapiens (Human)
6	0.98	0.881	1.124	LASP1_HUMAN	LIM and SH3 domain protein 1 (LASP-1) (MLN 50) - Homo sapiens (Human)
2	1.54	0.855	0.731	LBR_HUMAN	Lamin-B receptor (Integral nuclear envelope inner membrane protein) (LMN2R) - Homo sapiens (Human)
3	0.816	1.293	1.255	LC7L2_HUMAN	Putative RNA-binding protein Luc7-like 2 - Homo sapiens (Human)
1	1.209	1.252	0.638	LDHA_HUMAN	L-lactate dehydrogenase A chain (EC 1.1.1.27) (LDH-A) (LDH muscle subunit) (LDH-M) (Proliferation-inducing gene 19 protein) (Renal carcinoma antigen NY-REN-59) - Homo sapiens (Human)
5	1.282	0.557	1.49	LDHA_HUMAN	L-lactate dehydrogenase A chain (EC 1.1.1.27) (LDH-A) (LDH muscle subunit) (LDH-M) (Proliferation-inducing gene 19 protein) (Renal carcinoma antigen NY-REN-59) - Homo sapiens (Human)
6	0.731	0.488	2.718	LDHA_HUMAN	L-lactate dehydrogenase A chain (EC 1.1.1.27) (LDH-A) (LDH muscle subunit) (LDH-M) (Proliferation-inducing gene 19 protein) (Renal carcinoma antigen NY-REN-59) - Homo sapiens (Human)
2	0.925	0.837	1.242	LDHB_HUMAN	L-lactate dehydrogenase B chain (EC 1.1.1.27) (LDH-B) (LDH heart subunit) (LDH-H) (Renal carcinoma antigen NY-REN-46) - Homo sapiens (Human)
5	1.33	0.368	2.173	LDHB_HUMAN	L-lactate dehydrogenase B chain (EC 1.1.1.27) (LDH-B) (LDH heart subunit) (LDH-H) (Renal carcinoma antigen NY-REN-46) - Homo sapiens (Human)
6	2.121	0.278	1.648	LDHB_HUMAN	L-lactate dehydrogenase B chain (EC 1.1.1.27) (LDH-B) (LDH heart subunit) (LDH-H) (Renal carcinoma antigen NY-REN-46) - Homo sapiens (Human)
1	2.214	0.371	1.176	LEG1_HUMAN	Galectin-1 (Lectin galactoside-binding soluble 1) (Beta-galactoside-binding lectin L-14-I) (Lactose-binding lectin 1) (S-Lac lectin 1) (Galaptin) (14 kDa lectin) (HPL) (HBL) (Putative MAPK-activating protein MP12) - Homo sapiens (Human)
2	2.274	0.734	0.577	LEG1_HUMAN	Galectin-1 (Lectin galactoside-binding soluble 1) (Beta-galactoside-binding lectin L-14-I) (Lactose-binding lectin 1) (S-Lac lectin 1) (Galaptin) (14 kDa lectin) (HPL) (HBL) (Putative MAPK-activating protein MP12) - Homo sapiens (Human)
5	0.968	1.212	0.906	LEG1_HUMAN	Galectin-1 (Lectin galactoside-binding soluble 1) (Beta-galactoside-binding lectin L-14-I) (Lactose-binding lectin 1) (S-Lac lectin 1) (Galaptin) (14 kDa lectin) (HPL) (HBL) (Putative MAPK-activating protein MP12) - Homo sapiens (Human)
5	0.822	0.915	1.413	LEUK_HUMAN	Leukosialin precursor (Leukocyte sialoglycoprotein) (Sialophorin) (Galactoglycoprotein) (GALGP) (CD43 antigen) - Homo sapiens (Human)
5	0.574	0.986	1.879	LKHA4_HUMAN	Leukotriene A-4 hydrolase (EC 3.3.2.6) (LTA-4 hydrolase) (Leukotriene A(4) hydrolase) - Homo sapiens (Human)
6	2.097	0.445	1.04	LKHA4_HUMAN	Leukotriene A-4 hydrolase (EC 3.3.2.6) (LTA-4 hydrolase) (Leukotriene A(4) hydrolase) - Homo sapiens (Human)
1	1.125	1.216	0.698	LMNB1_HUMAN	Lamin-B1 - Homo sapiens (Human)
3	1.577	0.643	1.306	LMNB1_HUMAN	Lamin-B1 - Homo sapiens (Human)
5	1.178	1.212	0.745	LMNB1_HUMAN	Lamin-B1 - Homo sapiens (Human)
6	0.541	1.326	1.353	LMNB1_HUMAN	Lamin-B1 - Homo sapiens (Human)
1	1.089	1.213	0.726	LMNB2_HUMAN	Lamin-B2 - Homo sapiens (Human)
2	0.649	0.974	1.522	LMNB2_HUMAN	Lamin-B2 - Homo sapiens (Human)
3	1.585	1.071	0.78	LMNB2_HUMAN	Lamin-B2 - Homo sapiens (Human)
5	0.752	1.749	0.808	LMNB2_HUMAN	Lamin-B2 - Homo sapiens (Human)
6	0.594	1.353	1.207	LMNB2_HUMAN	Lamin-B2 - Homo sapiens (Human)
5	1.308	1.07	0.76	LOX5_HUMAN	Arachidonate 5-lipoxygenase (EC 1.13.11.34) (5-lipoxygenase) (5-LO) - Homo sapiens (Human)
5	0.889	1.768	0.676	LSM4_HUMAN	U6 snRNA-associated Sm-like protein LSm4 (Glycine-rich protein) (GRP) - Homo sapiens (Human)
2	0.991	1.025	0.948	LSM5_HUMAN	U6 snRNA-associated Sm-like protein LSm5 - Homo sapiens (Human)
6	1.156	1.054	0.797	LSM6_HUMAN	U6 snRNA-associated Sm-like protein LSm6 (Sm protein F) - Homo sapiens (Human)
2	0.288	1.242	2.694	LSP1_HUMAN	Lymphocyte-specific protein 1 (Protein pp52) (52 kDa phosphoprotein) (Lymphocyte-specific antigen WP34) (47 kDa actin-binding protein) - Homo sapiens (Human)
5	1.044	1.378	0.739	LSP1_HUMAN	Lymphocyte-specific protein 1 (Protein pp52) (52 kDa phosphoprotein) (Lymphocyte-specific antigen WP34) (47 kDa actin-binding protein) - Homo sapiens (Human)
6	0.668	1.35	1.087	LSP1_HUMAN	Lymphocyte-specific protein 1 (Protein pp52) (52 kDa phosphoprotein) (Lymphocyte-specific antigen WP34) (47 kDa actin-binding protein) - Homo sapiens (Human)
2	0.756	0.566	2.249	LYPA1_HUMAN	Acyl-protein thioesterase 1 (EC 3.1.2.-) (Lysophospholipase 1) (Lysophospholipase I) - Homo sapiens (Human)
5	1.412	1.097	0.686	LYRIC_HUMAN	Protein LYRIC (Lysine-rich CEACAM1 co-isolated protein) (3D3/lyric) (Metastasis adhesion protein) (Metadherin) (Astrocyte elevated gene-1 protein) (AEG-1) - Homo sapiens (Human)
3	3.059	0.404	1.073	LYSC_HUMAN	Lysozyme C precursor (EC 3.2.1.17) (1,4-beta-N-acetylmuramidase C) - Homo sapiens (Human)
5	0.491	1.468	1.475	MAGG1_HUMAN	Melanoma-associated antigen G1 (MAGE-G1 antigen) (Necdin-like protein 2) (Hepatocellular carcinoma-associated protein 4) - Homo sapiens (Human)
6	0.534	1.262	1.439	MAGG1_HUMAN	Melanoma-associated antigen G1 (MAGE-G1 antigen) (Necdin-like protein 2) (Hepatocellular carcinoma-associated protein 4) - Homo sapiens (Human)
3	1.661	0.849	0.94	MAOM_HUMAN	NAD-dependent malic enzyme, mitochondrial precursor (EC 1.1.1.38) (NAD-ME) (Malic enzyme 2) - Homo sapiens (Human)
2	0.745	1.004	1.286	MAP4_HUMAN	Microtubule-associated protein 4 (MAP 4) - Homo sapiens (Human)
5	0.799	1.056	1.259	MAP4_HUMAN	Microtubule-associated protein 4 (MAP 4) - Homo sapiens (Human)
2	1.034	0.698	1.499	MARE1_HUMAN	Microtubule-associated protein RP/EB family member 1 (APC-binding protein EB1) (End-binding protein 1) (EB1) - Homo sapiens (Human)
5	0.625	0.526	3.233	MARE1_HUMAN	Microtubule-associated protein RP/EB family member 1 (APC-binding protein EB1) (End-binding protein 1) (EB1) - Homo sapiens (Human)
6	3.156	0.302	1.017	MARE1_HUMAN	Microtubule-associated protein RP/EB family member 1 (APC-binding protein EB1) (End-binding protein 1) (EB1) - Homo sapiens (Human)
3	0.865	2.361	0.649	MATR3_HUMAN	Matrin-3 - Homo sapiens (Human)
5	0.815	1.625	0.803	MATR3_HUMAN	Matrin-3 - Homo sapiens (Human)
6	0.705	2.107	0.654	MATR3_HUMAN	Matrin-3 - Homo sapiens (Human)
2	0.866	0.343	3.235	MCCC2_HUMAN	Methylcrotonoyl-CoA carboxylase beta chain, mitochondrial precursor (EC 6.4.1.4) (3-Methylcrotonyl-CoA carboxylase 2) (MCCase subunit beta) (3-methylcrotonyl-CoA:carbon dioxide ligase subunit beta) (3-Methylcrotonyl-CoA carboxylase non-biotin-contai
2	0.945	1.283	0.793	MDHC_HUMAN	Malate dehydrogenase, cytoplasmic (EC 1.1.1.37) (Cytosolic malate dehydrogenase) - Homo sapiens (Human)
3	0.767	1.53	1.128	MDHC_HUMAN	Malate dehydrogenase, cytoplasmic (EC 1.1.1.37) (Cytosolic malate dehydrogenase) - Homo sapiens (Human)
5	1.041	0.679	1.504	MDHC_HUMAN	Malate dehydrogenase, cytoplasmic (EC 1.1.1.37) (Cytosolic malate dehydrogenase) - Homo sapiens (Human)
6	3.988	0.316	0.77	MDHC_HUMAN	Malate dehydrogenase, cytoplasmic (EC 1.1.1.37) (Cytosolic malate dehydrogenase) - Homo sapiens (Human)
1	1.001	0.796	1.212	MDHM_HUMAN	Malate dehydrogenase, mitochondrial precursor (EC 1.1.1.37) - Homo sapiens (Human)
2	0.939	0.922	1.111	MDHM_HUMAN	Malate dehydrogenase, mitochondrial precursor (EC 1.1.1.37) - Homo sapiens (Human)
3	0.666	2.272	0.875	MDHM_HUMAN	Malate dehydrogenase, mitochondrial precursor (EC 1.1.1.37) - Homo sapiens (Human)
5	1.359	1.307	0.597	MDHM_HUMAN	Malate dehydrogenase, mitochondrial precursor (EC 1.1.1.37) - Homo sapiens (Human)
6	1.149	1.566	0.539	MDHM_HUMAN	Malate dehydrogenase, mitochondrial precursor (EC 1.1.1.37) - Homo sapiens (Human)
2	1.457	1.17	0.564	MECP2_HUMAN	Methyl-CpG-binding protein 2 (MeCP-2 protein) (MeCP2) - Homo sapiens (Human)
2	0.727	0.772	1.714	MGMT_HUMAN	Methylated-DNA--protein-cysteine methyltransferase (EC 2.1.1.63) (6-O-methylguanine-DNA methyltransferase) (MGMT) (O-6-methylguanine-DNA-alkyltransferase) - Homo sapiens (Human)
1	0.658	1.894	0.775	MIF_HUMAN	Macrophage migration inhibitory factor (MIF) (Phenylpyruvate tautomerase) (EC 5.3.2.1) (Glycosylation-inhibiting factor) (GIF) - Homo sapiens (Human)
2	1.076	0.762	1.173	MIF_HUMAN	Macrophage migration inhibitory factor (MIF) (Phenylpyruvate tautomerase) (EC 5.3.2.1) (Glycosylation-inhibiting factor) (GIF) - Homo sapiens (Human)
5	1.515	0.571	1.229	MIF_HUMAN	Macrophage migration inhibitory factor (MIF) (Phenylpyruvate tautomerase) (EC 5.3.2.1) (Glycosylation-inhibiting factor) (GIF) - Homo sapiens (Human)
6	4.781	0.375	0.541	MIF_HUMAN	Macrophage migration inhibitory factor (MIF) (Phenylpyruvate tautomerase) (EC 5.3.2.1) (Glycosylation-inhibiting factor) (GIF) - Homo sapiens (Human)
1	0.663	0.991	1.47	MK01_HUMAN	Mitogen-activated protein kinase 1 (EC 2.7.11.24) (Extracellular signal-regulated kinase 2) (ERK-2) (Mitogen-activated protein kinase 2) (MAP kinase 2) (MAPK 2) (p42-MAPK) (ERT1) - Homo sapiens (Human)
1	0.746	0.518	2.501	MLE1_HUMAN	Myosin light chain 1, skeletal muscle isoform (MLC1F) (A1 catalytic) (Alkali myosin light chain 1) - Homo sapiens (Human)
1	0.972	1.113	0.894	MOES_HUMAN	Moesin (Membrane-organizing extension spike protein) - Homo sapiens (Human)
2	1.197	1.32	0.609	MOES_HUMAN	Moesin (Membrane-organizing extension spike protein) - Homo sapiens (Human)
3	0.402	2.46	1.339	MOES_HUMAN	Moesin (Membrane-organizing extension spike protein) - Homo sapiens (Human)
4	1.024	1.93	0.479	MOES_HUMAN	Moesin (Membrane-organizing extension spike protein) - Homo sapiens (Human)
5	0.965	0.933	1.181	MOES_HUMAN	Moesin (Membrane-organizing extension spike protein) - Homo sapiens (Human)
6	0.725	1.499	0.893	MOES_HUMAN	Moesin (Membrane-organizing extension spike protein) - Homo sapiens (Human)
5	3.804	0.532	0.525	MPCP_HUMAN	Phosphate carrier protein, mitochondrial precursor (PTP) (Solute carrier family 25 member 3) - Homo sapiens (Human)
6	−−−	−−−	−−−	MPCP_HUMAN	Phosphate carrier protein, mitochondrial precursor (PTP) (Solute carrier family 25 member 3) - Homo sapiens (Human)
2	0.977	1.332	0.739	MTAP_HUMAN	S-methyl-5-thioadenosine phosphorylase (EC 2.4.2.28) (5~-methylthioadenosine phosphorylase) (MTA phosphorylase) (MTAPase) - Homo sapiens (Human)
2	0.893	1.008	1.068	MTCH2_HUMAN	Mitochondrial carrier homolog 2 (Met-induced mitochondrial protein) - Homo sapiens (Human)
1	0.307	0.963	3.271	MTPN_HUMAN	Myotrophin (Protein V-1) - Homo sapiens (Human)
5	1.139	0.538	1.736	MTPN_HUMAN	Myotrophin (Protein V-1) - Homo sapiens (Human)
1	1.525	0.5	1.267	MYH9_HUMAN	Myosin-9 (Myosin heavy chain 9) (Myosin heavy chain, nonmuscle IIa) (Nonmuscle myosin heavy chain IIa) (NMMHC II-a) (NMMHC-IIA) (Cellular myosin heavy chain, type A) (Nonmuscle myosin heavy chain-A) (NMMHC-A) - Homo sapiens (Human)
2	0.806	0.662	1.98	MYH9_HUMAN	Myosin-9 (Myosin heavy chain 9) (Myosin heavy chain, nonmuscle IIa) (Nonmuscle myosin heavy chain IIa) (NMMHC II-a) (NMMHC-IIA) (Cellular myosin heavy chain, type A) (Nonmuscle myosin heavy chain-A) (NMMHC-A) - Homo sapiens (Human)
4	2.659	0.449	0.795	MYH9_HUMAN	Myosin-9 (Myosin heavy chain 9) (Myosin heavy chain, nonmuscle IIa) (Nonmuscle myosin heavy chain IIa) (NMMHC II-a) (NMMHC-IIA) (Cellular myosin heavy chain, type A) (Nonmuscle myosin heavy chain-A) (NMMHC-A) - Homo sapiens (Human)
5	3.761	0.453	0.624	MYH9_HUMAN	Myosin-9 (Myosin heavy chain 9) (Myosin heavy chain, nonmuscle IIa) (Nonmuscle myosin heavy chain IIa) (NMMHC II-a) (NMMHC-IIA) (Cellular myosin heavy chain, type A) (Nonmuscle myosin heavy chain-A) (NMMHC-A) - Homo sapiens (Human)
1	0.968	−6.086	−0.164	NAGK_HUMAN	N-acetylglucosamine kinase (EC 2.7.1.59) (GlcNAc kinase) - Homo sapiens (Human)
6	2.162	0.507	0.886	NCOR1_HUMAN	Nuclear receptor corepressor 1 (N-CoR1) (N-CoR) - Homo sapiens (Human)
2	0.777	0.973	1.273	NDUB4_HUMAN	NADH dehydrogenase [ubiquinone] 1 beta subcomplex subunit 4 (EC 1.6.5.3) (EC 1.6.99.3) (NADH-ubiquinone oxidoreductase B15 subunit) (Complex I-B15) (CI-B15) - Homo sapiens (Human)
2	0.92	1.154	0.906	NDUBA_HUMAN	NADH dehydrogenase [ubiquinone] 1 beta subcomplex subunit 10 (EC 1.6.5.3) (EC 1.6.99.3) (NADH-ubiquinone oxidoreductase PDSW subunit) (Complex I-PDSW) (CI-PDSW) - Homo sapiens (Human)
5	0.964	0.708	1.558	NECP2_HUMAN	Adaptin ear-binding coat-associated protein 2 (NECAP-2) - Homo sapiens (Human)
6	2.772	0.564	0.621	NECP2_HUMAN	Adaptin ear-binding coat-associated protein 2 (NECAP-2) - Homo sapiens (Human)
2	0.967	0.749	1.328	NEUG_HUMAN	Neurogranin (Ng) (RC3) - Homo sapiens (Human)
5	0.912	0.166	7.021	NEUG_HUMAN	Neurogranin (Ng) (RC3) - Homo sapiens (Human)
3	0.634	1.708	1.224	NGBR_HUMAN	Nogo-B receptor precursor (NgBR) (Nuclear undecaprenyl pyrophosphate synthase 1 homolog) - Homo sapiens (Human)
1	0.925	0.846	1.234	NH2L1_HUMAN	NHP2-like protein 1 (High mobility group-like nuclear protein 2 homolog 1) (U4/U6.U5 tri-snRNP 15.5 kDa protein) (OTK27) (hSNU13) - Homo sapiens (Human)
3	1.952	−19.353	−0.035	NH2L1_HUMAN	NHP2-like protein 1 (High mobility group-like nuclear protein 2 homolog 1) (U4/U6.U5 tri-snRNP 15.5 kDa protein) (OTK27) (hSNU13) - Homo sapiens (Human)
5	−9.634	−0.181	0.609	NH2L1_HUMAN	NHP2-like protein 1 (High mobility group-like nuclear protein 2 homolog 1) (U4/U6.U5 tri-snRNP 15.5 kDa protein) (OTK27) (hSNU13) - Homo sapiens (Human)
6	0.889	0.918	1.188	NH2L1_HUMAN	NHP2-like protein 1 (High mobility group-like nuclear protein 2 homolog 1) (U4/U6.U5 tri-snRNP 15.5 kDa protein) (OTK27) (hSNU13) - Homo sapiens (Human)
2	1.038	1.389	0.667	NOLC1_HUMAN	Nucleolar phosphoprotein p130 (Nucleolar 130 kDa protein) (140 kDa nucleolar phosphoprotein) (Nopp140) (Nucleolar and coiled-body phosphoprotein 1) - Homo sapiens (Human)
6	0.51	0.994	1.916	NOP5_HUMAN	Nucleolar protein NOP5 (Nucleolar protein 5) (NOP58) - Homo sapiens (Human)
1	0.787	1.865	0.659	NPM_HUMAN	Nucleophosmin (NPM) (Nucleolar phosphoprotein B23) (Numatrin) (Nucleolar protein NO38) - Homo sapiens (Human)
3	3.199	1.145	0.362	NPM_HUMAN	Nucleophosmin (NPM) (Nucleolar phosphoprotein B23) (Numatrin) (Nucleolar protein NO38) - Homo sapiens (Human)
4	0.708	3.264	0.41	NPM_HUMAN	Nucleophosmin (NPM) (Nucleolar phosphoprotein B23) (Numatrin) (Nucleolar protein NO38) - Homo sapiens (Human)
5	0.709	2.014	0.741	NPM_HUMAN	Nucleophosmin (NPM) (Nucleolar phosphoprotein B23) (Numatrin) (Nucleolar protein NO38) - Homo sapiens (Human)
6	0.562	2.452	0.621	NPM_HUMAN	Nucleophosmin (NPM) (Nucleolar phosphoprotein B23) (Numatrin) (Nucleolar protein NO38) - Homo sapiens (Human)
3	0.548	2.189	1.105	NSF1C_HUMAN	NSFL1 cofactor p47 (p97 cofactor p47) - Homo sapiens (Human)
6	1.731	−6.299	−0.089	NU133_HUMAN	Nuclear pore complex protein Nup133 (Nucleoporin Nup133) (133 kDa nucleoporin) - Homo sapiens (Human)
2	0.75	0.911	1.409	NUCKS_HUMAN	Nuclear ubiquitous casein and cyclin-dependent kinases substrate (P1) - Homo sapiens (Human)
5	1.036	0.99	1.037	NUCKS_HUMAN	Nuclear ubiquitous casein and cyclin-dependent kinases substrate (P1) - Homo sapiens (Human)
6	3.939	0.322	0.764	NUCKS_HUMAN	Nuclear ubiquitous casein and cyclin-dependent kinases substrate (P1) - Homo sapiens (Human)
1	0.932	1.306	0.748	NUCL_HUMAN	Nucleolin (Protein C23) - Homo sapiens (Human)
2	0.888	1.25	0.867	NUCL_HUMAN	Nucleolin (Protein C23) - Homo sapiens (Human)
3	1.485	2.084	0.445	NUCL_HUMAN	Nucleolin (Protein C23) - Homo sapiens (Human)
4	0.96	2.597	0.377	NUCL_HUMAN	Nucleolin (Protein C23) - Homo sapiens (Human)
5	0.98	1.339	0.81	NUCL_HUMAN	Nucleolin (Protein C23) - Homo sapiens (Human)
6	0.419	2.192	0.955	NUCL_HUMAN	Nucleolin (Protein C23) - Homo sapiens (Human)
5	1.584	1.674	0.401	NUMA1_HUMAN	Nuclear mitotic apparatus protein 1 (NuMA protein) (SP-H antigen) - Homo sapiens (Human)
3	0.813	2.278	0.715	NUPL_HUMAN	Nucleoporin-like protein RIP (HIV-1 Rev-binding protein) (Rev-interacting protein) (Rev/Rex activation domain-binding protein) - Homo sapiens (Human)
2	1.027	1.582	0.592	ODO1_HUMAN	2-oxoglutarate dehydrogenase E1 component, mitochondrial precursor (EC 1.2.4.2) (Alpha-ketoglutarate dehydrogenase) - Homo sapiens (Human)
6	0.628	1.262	1.225	ODO2_HUMAN	Dihydrolipoyllysine-residue succinyltransferase component of 2-oxoglutarate dehydrogenase complex, mitochondrial precursor (EC 2.3.1.61) (Dihydrolipoamide succinyltransferase component of 2-oxoglutarate dehydrogenase complex) (E2) (E2K) - Homo sapie
3	1.29	1.245	0.825	PA2G4_HUMAN	Proliferation-associated protein 2G4 (Cell cycle protein p38-2G4 homolog) (hG4-1) (ErbB3-binding protein 1) - Homo sapiens (Human)
5	0.762	1.492	0.936	PA2G4_HUMAN	Proliferation-associated protein 2G4 (Cell cycle protein p38-2G4 homolog) (hG4-1) (ErbB3-binding protein 1) - Homo sapiens (Human)
6	0.709	0.882	1.553	PA2G4_HUMAN	Proliferation-associated protein 2G4 (Cell cycle protein p38-2G4 homolog) (hG4-1) (ErbB3-binding protein 1) - Homo sapiens (Human)
1	0.956	0.309	3.276	PABP2_HUMAN	Polyadenylate-binding protein 2 (Poly(A)-binding protein 2) (Poly(A)-binding protein II) (PABII) (Polyadenylate-binding nuclear protein 1) (Nuclear poly(A)-binding protein 1) - Homo sapiens (Human)
3	###	0	−998.247	PABP2_HUMAN	Polyadenylate-binding protein 2 (Poly(A)-binding protein 2) (Poly(A)-binding protein II) (PABII) (Polyadenylate-binding nuclear protein 1) (Nuclear poly(A)-binding protein 1) - Homo sapiens (Human)
2	0.906	0.959	1.107	PABP3_HUMAN	Polyadenylate-binding protein 3 (Poly(A)-binding protein 3) (PABP 3) (Testis-specific poly(A)-binding protein) - Homo sapiens (Human)
6	3.27	0.5	0.594	PABP3_HUMAN	Polyadenylate-binding protein 3 (Poly(A)-binding protein 3) (PABP 3) (Testis-specific poly(A)-binding protein) - Homo sapiens (Human)
2	1.045	1.085	0.848	PAK2_HUMAN	Serine/threonine-protein kinase PAK 2 (EC 2.7.11.1) (p21-activated kinase 2) (PAK-2) (PAK65) (Gamma-PAK) (S6/H4 kinase) - Homo sapiens (Human)
5	0.781	1.162	1.171	PAK2_HUMAN	Serine/threonine-protein kinase PAK 2 (EC 2.7.11.1) (p21-activated kinase 2) (PAK-2) (PAK65) (Gamma-PAK) (S6/H4 kinase) - Homo sapiens (Human)
6	0.906	0.884	1.213	PAK2_HUMAN	Serine/threonine-protein kinase PAK 2 (EC 2.7.11.1) (p21-activated kinase 2) (PAK-2) (PAK65) (Gamma-PAK) (S6/H4 kinase) - Homo sapiens (Human)
1	0.783	1.47	0.839	PARK7_HUMAN	Protein DJ-1 (Oncogene DJ1) - Homo sapiens (Human)
3	0.998	1.744	0.761	PARK7_HUMAN	Protein DJ-1 (Oncogene DJ1) - Homo sapiens (Human)
6	4.562	0.414	0.514	PARK7_HUMAN	Protein DJ-1 (Oncogene DJ1) - Homo sapiens (Human)
4	1.793	1.468	0.36	PARP1_HUMAN	Poly [ADP-ribose] polymerase 1 (EC 2.4.2.30) (PARP-1) (ADPRT) (NAD(+) ADP-ribosyltransferase 1) (Poly[ADP-ribose] synthetase 1) - Homo sapiens (Human)
5	1.969	1.116	0.484	PARP1_HUMAN	Poly [ADP-ribose] polymerase 1 (EC 2.4.2.30) (PARP-1) (ADPRT) (NAD(+) ADP-ribosyltransferase 1) (Poly[ADP-ribose] synthetase 1) - Homo sapiens (Human)
6	0.357	1.15	2.362	PARP1_HUMAN	Poly [ADP-ribose] polymerase 1 (EC 2.4.2.30) (PARP-1) (ADPRT) (NAD(+) ADP-ribosyltransferase 1) (Poly[ADP-ribose] synthetase 1) - Homo sapiens (Human)
6	1.782	0.647	0.841	PCBP1_HUMAN	Poly(rC)-binding protein 1 (Alpha-CP1) (hnRNP-E1) (Nucleic acid-binding protein SUB2.3) - Homo sapiens (Human)
2	0.999	0.968	0.995	PCDGF_HUMAN	Protocadherin gamma B3 precursor (PCDH-gamma-B3) - Homo sapiens (Human)
3	0.69	2.005	0.958	PDCD4_HUMAN	Programmed cell death protein 4 (Nuclear antigen H731-like) (Neoplastic transformation inhibitor protein) (Protein 197/15a) - Homo sapiens (Human)
5	0.806	1.098	1.2	PDCD4_HUMAN	Programmed cell death protein 4 (Nuclear antigen H731-like) (Neoplastic transformation inhibitor protein) (Protein 197/15a) - Homo sapiens (Human)
2	1.077	0.639	1.398	PDIA1_HUMAN	Protein disulfide-isomerase precursor (EC 5.3.4.1) (PDI) (Prolyl 4-hydroxylase subunit beta) (Cellular thyroid hormone-binding protein) (p55) - Homo sapiens (Human)
5	0.7	0.895	1.697	PDIA1_HUMAN	Protein disulfide-isomerase precursor (EC 5.3.4.1) (PDI) (Prolyl 4-hydroxylase subunit beta) (Cellular thyroid hormone-binding protein) (p55) - Homo sapiens (Human)
1	1.186	0.499	1.632	PDIA3_HUMAN	Protein disulfide-isomerase A3 precursor (EC 5.3.4.1) (Disulfide isomerase ER-60) (ERp60) (58 kDa microsomal protein) (p58) (ERp57) (58 kDa glucose-regulated protein) - Homo sapiens (Human)
2	0.611	0.888	1.772	PDIA3_HUMAN	Protein disulfide-isomerase A3 precursor (EC 5.3.4.1) (Disulfide isomerase ER-60) (ERp60) (58 kDa microsomal protein) (p58) (ERp57) (58 kDa glucose-regulated protein) - Homo sapiens (Human)
3	2.123	0.792	0.788	PDIA3_HUMAN	Protein disulfide-isomerase A3 precursor (EC 5.3.4.1) (Disulfide isomerase ER-60) (ERp60) (58 kDa microsomal protein) (p58) (ERp57) (58 kDa glucose-regulated protein) - Homo sapiens (Human)
5	1.006	0.978	1.081	PDIA3_HUMAN	Protein disulfide-isomerase A3 precursor (EC 5.3.4.1) (Disulfide isomerase ER-60) (ERp60) (58 kDa microsomal protein) (p58) (ERp57) (58 kDa glucose-regulated protein) - Homo sapiens (Human)
6	1.37	0.589	1.201	PDIA3_HUMAN	Protein disulfide-isomerase A3 precursor (EC 5.3.4.1) (Disulfide isomerase ER-60) (ERp60) (58 kDa microsomal protein) (p58) (ERp57) (58 kDa glucose-regulated protein) - Homo sapiens (Human)
1	0.773	2.675	0.467	PEBP1_HUMAN	Phosphatidylethanolamine-binding protein 1 (PEBP-1) (Prostatic-binding protein) (HCNPpp) (Neuropolypeptide h3) (Raf kinase inhibitor protein) (RKIP) [Contains: Hippocampal cholinergic neurostimulating peptide (HCNP)] - Homo sapiens (Human)
2	1.257	0.968	0.79	PEBP1_HUMAN	Phosphatidylethanolamine-binding protein 1 (PEBP-1) (Prostatic-binding protein) (HCNPpp) (Neuropolypeptide h3) (Raf kinase inhibitor protein) (RKIP) [Contains: Hippocampal cholinergic neurostimulating peptide (HCNP)] - Homo sapiens (Human)
3	0.721	2.38	0.771	PEBP1_HUMAN	Phosphatidylethanolamine-binding protein 1 (PEBP-1) (Prostatic-binding protein) (HCNPpp) (Neuropolypeptide h3) (Raf kinase inhibitor protein) (RKIP) [Contains: Hippocampal cholinergic neurostimulating peptide (HCNP)] - Homo sapiens (Human)
4	0.844	3.539	0.317	PEBP1_HUMAN	Phosphatidylethanolamine-binding protein 1 (PEBP-1) (Prostatic-binding protein) (HCNPpp) (Neuropolypeptide h3) (Raf kinase inhibitor protein) (RKIP) [Contains: Hippocampal cholinergic neurostimulating peptide (HCNP)] - Homo sapiens (Human)
5	1.482	1.018	0.705	PEBP1_HUMAN	Phosphatidylethanolamine-binding protein 1 (PEBP-1) (Prostatic-binding protein) (HCNPpp) (Neuropolypeptide h3) (Raf kinase inhibitor protein) (RKIP) [Contains: Hippocampal cholinergic neurostimulating peptide (HCNP)] - Homo sapiens (Human)
6	3.336	0.946	0.308	PEBP1_HUMAN	Phosphatidylethanolamine-binding protein 1 (PEBP-1) (Prostatic-binding protein) (HCNPpp) (Neuropolypeptide h3) (Raf kinase inhibitor protein) (RKIP) [Contains: Hippocampal cholinergic neurostimulating peptide (HCNP)] - Homo sapiens (Human)
2	2.443	0.491	0.802	PERM_HUMAN	Myeloperoxidase precursor (EC 1.11.1.7) (MPO) [Contains: 89 kDa myeloperoxidase; 84 kDa myeloperoxidase; Myeloperoxidase light chain; Myeloperoxidase heavy chain] - Homo sapiens (Human)
5	1.964	1.048	0.517	PERM_HUMAN	Myeloperoxidase precursor (EC 1.11.1.7) (MPO) [Contains: 89 kDa myeloperoxidase; 84 kDa myeloperoxidase; Myeloperoxidase light chain; Myeloperoxidase heavy chain] - Homo sapiens (Human)
2	1.53	1.034	0.609	PGAM1_HUMAN	Phosphoglycerate mutase 1 (EC 5.4.2.1) (EC 5.4.2.4) (EC 3.1.3.13) (Phosphoglycerate mutase isozyme B) (PGAM-B) (BPG-dependent PGAM 1) - Homo sapiens (Human)
1	1.005	2.491	0.386	PGK1_HUMAN	Phosphoglycerate kinase 1 (EC 2.7.2.3) (Primer recognition protein 2) (PRP 2) - Homo sapiens (Human)
2	0.987	0.892	1.094	PGK1_HUMAN	Phosphoglycerate kinase 1 (EC 2.7.2.3) (Primer recognition protein 2) (PRP 2) - Homo sapiens (Human)
3	0.486	1.74	1.565	PGK1_HUMAN	Phosphoglycerate kinase 1 (EC 2.7.2.3) (Primer recognition protein 2) (PRP 2) - Homo sapiens (Human)
5	1.264	0.966	0.871	PGK1_HUMAN	Phosphoglycerate kinase 1 (EC 2.7.2.3) (Primer recognition protein 2) (PRP 2) - Homo sapiens (Human)
6	1.779	0.447	1.15	PGK1_HUMAN	Phosphoglycerate kinase 1 (EC 2.7.2.3) (Primer recognition protein 2) (PRP 2) - Homo sapiens (Human)
3	−0.152	0.396	−22.011	PGM2_HUMAN	Phosphoglucomutase-2 (EC 5.4.2.2) (Glucose phosphomutase 2) (PGM 2) - Homo sapiens (Human)
5	1.816	0.56	1.045	PGM2_HUMAN	Phosphoglucomutase-2 (EC 5.4.2.2) (Glucose phosphomutase 2) (PGM 2) - Homo sapiens (Human)
6	1.446	0.731	0.918	PGM2_HUMAN	Phosphoglucomutase-2 (EC 5.4.2.2) (Glucose phosphomutase 2) (PGM 2) - Homo sapiens (Human)
2	1.003	1.161	0.827	PHB_HUMAN	Prohibitin - Homo sapiens (Human)
4	1.571	1.103	0.547	PHB_HUMAN	Prohibitin - Homo sapiens (Human)
5	1.568	0.924	0.734	PHB_HUMAN	Prohibitin - Homo sapiens (Human)
6	1.265	1.046	0.667	PHB_HUMAN	Prohibitin - Homo sapiens (Human)
6	1.832	−6.205	−0.085	PKN1_HUMAN	Serine/threonine-protein kinase N1 (EC 2.7.11.13) (Protein kinase C-like 1) (Protein-kinase C-related kinase 1) (Protein kinase C-like PKN) (Serine-threonine protein kinase N) (Protein kinase PKN-alpha) - Homo sapiens (Human)
5	1.301	0.601	1.359	PLEC1_HUMAN	Plectin-1 (PLTN) (PCN) (Hemidesmosomal protein 1) (HD1) - Homo sapiens (Human)
6	0.793	1.203	1.017	PLEC1_HUMAN	Plectin-1 (PLTN) (PCN) (Hemidesmosomal protein 1) (HD1) - Homo sapiens (Human)
1	0.725	1.735	1.124	PLSL_HUMAN	Plastin-2 (L-plastin) (Lymphocyte cytosolic protein 1) (LCP-1) (LC64P) - Homo sapiens (Human)
2	0.981	0.678	1.447	PLSL_HUMAN	Plastin-2 (L-plastin) (Lymphocyte cytosolic protein 1) (LCP-1) (LC64P) - Homo sapiens (Human)
3	0.36	2.034	1.726	PLSL_HUMAN	Plastin-2 (L-plastin) (Lymphocyte cytosolic protein 1) (LCP-1) (LC64P) - Homo sapiens (Human)
4	0.752	1.311	0.96	PLSL_HUMAN	Plastin-2 (L-plastin) (Lymphocyte cytosolic protein 1) (LCP-1) (LC64P) - Homo sapiens (Human)
5	0.694	0.445	3.438	PLSL_HUMAN	Plastin-2 (L-plastin) (Lymphocyte cytosolic protein 1) (LCP-1) (LC64P) - Homo sapiens (Human)
6	4.026	0.213	1.131	PLSL_HUMAN	Plastin-2 (L-plastin) (Lymphocyte cytosolic protein 1) (LCP-1) (LC64P) - Homo sapiens (Human)
6	1.205	−7.546	−0.107	PNPT1_HUMAN	Polyribonucleotide nucleotidyltransferase 1, mitochondrial precursor (EC 2.7.7.8) (PNPase 1) (Polynucleotide phosphorylase-like protein) (PNPase old-35) (3~-5~ RNA exonuclease OLD35) - Homo sapiens (Human)
6	0.708	1.271	1.079	POP1_HUMAN	Ribonucleases P/MRP protein subunit POP1 (EC 3.1.26.5) (hPOP1) - Homo sapiens (Human)
5	−−−	−−−	−−−	PP14A_HUMAN	Protein phosphatase 1 regulatory subunit 14A (17 kDa PKC-potentiated inhibitory protein of PP1) (CPI-17) - Homo sapiens (Human)
6	−−−	−−−	−−−	PP14A_HUMAN	Protein phosphatase 1 regulatory subunit 14A (17 kDa PKC-potentiated inhibitory protein of PP1) (CPI-17) - Homo sapiens (Human)
2	1.064	0.778	1.162	PP1A_HUMAN	Serine/threonine-protein phosphatase PP1-alpha catalytic subunit (EC 3.1.3.16) (PP-1A) - Homo sapiens (Human)
5	0.853	1.043	1.195	PP1A_HUMAN	Serine/threonine-protein phosphatase PP1-alpha catalytic subunit (EC 3.1.3.16) (PP-1A) - Homo sapiens (Human)
6	0.955	0.536	1.895	PP1A_HUMAN	Serine/threonine-protein phosphatase PP1-alpha catalytic subunit (EC 3.1.3.16) (PP-1A) - Homo sapiens (Human)
5	0.752	1.067	1.324	PP1B_HUMAN	Serine/threonine-protein phosphatase PP1-beta catalytic subunit (EC 3.1.3.16) (PP-1B) - Homo sapiens (Human)
6	1.53	0.381	1.667	PP1B_HUMAN	Serine/threonine-protein phosphatase PP1-beta catalytic subunit (EC 3.1.3.16) (PP-1B) - Homo sapiens (Human)
1	1.102	2.754	0.318	PP2AB_HUMAN	Serine/threonine-protein phosphatase 2A catalytic subunit beta isoform (EC 3.1.3.16) (PP2A-beta) - Homo sapiens (Human)
1	0.928	−5.573	−0.187	PPAC_HUMAN	Low molecular weight phosphotyrosine protein phosphatase (EC 3.1.3.48) (LMW-PTPase) (LMW-PTP) (Low molecular weight cytosolic acid phosphatase) (EC 3.1.3.2) (Red cell acid phosphatase 1) (Adipocyte acid phosphatase) - Homo sapiens (Human)
1	0.856	1.788	0.635	PPIA_HUMAN	Peptidyl-prolyl cis-trans isomerase A (EC 5.2.1.8) (PPIase A) (Rotamase A) (Cyclophilin A) (Cyclosporin A-binding protein) - Homo sapiens (Human)
2	0.978	0.712	1.382	PPIA_HUMAN	Peptidyl-prolyl cis-trans isomerase A (EC 5.2.1.8) (PPIase A) (Rotamase A) (Cyclophilin A) (Cyclosporin A-binding protein) - Homo sapiens (Human)
3	0.925	1.679	4.038	PPIA_HUMAN	Peptidyl-prolyl cis-trans isomerase A (EC 5.2.1.8) (PPIase A) (Rotamase A) (Cyclophilin A) (Cyclosporin A-binding protein) - Homo sapiens (Human)
4	0.775	1.979	0.616	PPIA_HUMAN	Peptidyl-prolyl cis-trans isomerase A (EC 5.2.1.8) (PPIase A) (Rotamase A) (Cyclophilin A) (Cyclosporin A-binding protein) - Homo sapiens (Human)
5	1.194	0.625	1.421	PPIA_HUMAN	Peptidyl-prolyl cis-trans isomerase A (EC 5.2.1.8) (PPIase A) (Rotamase A) (Cyclophilin A) (Cyclosporin A-binding protein) - Homo sapiens (Human)
6	2.9	0.561	0.597	PPIA_HUMAN	Peptidyl-prolyl cis-trans isomerase A (EC 5.2.1.8) (PPIase A) (Rotamase A) (Cyclophilin A) (Cyclosporin A-binding protein) - Homo sapiens (Human)
2	1.354	1.303	0.545	PPIB_HUMAN	Peptidyl-prolyl cis-trans isomerase B precursor (EC 5.2.1.8) (PPIase) (Rotamase) (Cyclophilin B) (S-cyclophilin) (SCYLP) (CYP-S1) - Homo sapiens (Human)
3	1.715	1.433	0.539	PPIB_HUMAN	Peptidyl-prolyl cis-trans isomerase B precursor (EC 5.2.1.8) (PPIase) (Rotamase) (Cyclophilin B) (S-cyclophilin) (SCYLP) (CYP-S1) - Homo sapiens (Human)
1	0.817	2.517	0.47	PRDX1_HUMAN	Peroxiredoxin-1 (EC 1.11.1.15) (Thioredoxin peroxidase 2) (Thioredoxin-dependent peroxide reductase 2) (Proliferation-associated gene protein) (PAG) (Natural killer cell-enhancing factor A) (NKEF-A) - Homo sapiens (Human)
2	0.981	1.15	0.881	PRDX1_HUMAN	Peroxiredoxin-1 (EC 1.11.1.15) (Thioredoxin peroxidase 2) (Thioredoxin-dependent peroxide reductase 2) (Proliferation-associated gene protein) (PAG) (Natural killer cell-enhancing factor A) (NKEF-A) - Homo sapiens (Human)
3	1.499	1.236	0.715	PRDX1_HUMAN	Peroxiredoxin-1 (EC 1.11.1.15) (Thioredoxin peroxidase 2) (Thioredoxin-dependent peroxide reductase 2) (Proliferation-associated gene protein) (PAG) (Natural killer cell-enhancing factor A) (NKEF-A) - Homo sapiens (Human)
5	0.813	1.115	1.172	PRDX1_HUMAN	Peroxiredoxin-1 (EC 1.11.1.15) (Thioredoxin peroxidase 2) (Thioredoxin-dependent peroxide reductase 2) (Proliferation-associated gene protein) (PAG) (Natural killer cell-enhancing factor A) (NKEF-A) - Homo sapiens (Human)
6	1.26	1.186	0.731	PRDX1_HUMAN	Peroxiredoxin-1 (EC 1.11.1.15) (Thioredoxin peroxidase 2) (Thioredoxin-dependent peroxide reductase 2) (Proliferation-associated gene protein) (PAG) (Natural killer cell-enhancing factor A) (NKEF-A) - Homo sapiens (Human)
3	0.61	1.683	1.291	PRDX2_HUMAN	Peroxiredoxin-2 (EC 1.11.1.15) (Thioredoxin peroxidase 1) (Thioredoxin-dependent peroxide reductase 1) (Thiol-specific antioxidant protein) (TSA) (PRP) (Natural killer cell-enhancing factor B) (NKEF-B) - Homo sapiens (Human)
2	0.938	0.819	1.53	PRDX5_HUMAN	Peroxiredoxin-5, mitochondrial precursor (EC 1.11.1.15) (Prx-V) (Peroxisomal antioxidant enzyme) (PLP) (Thioredoxin reductase) (Thioredoxin peroxidase PMP20) (Antioxidant enzyme B166) (AOEB166) (TPx type VI) (Liver tissue 2D-page spot 71B) (Alu core
5	0.881	0.883	1.368	PRDX5_HUMAN	Peroxiredoxin-5, mitochondrial precursor (EC 1.11.1.15) (Prx-V) (Peroxisomal antioxidant enzyme) (PLP) (Thioredoxin reductase) (Thioredoxin peroxidase PMP20) (Antioxidant enzyme B166) (AOEB166) (TPx type VI) (Liver tissue 2D-page spot 71B) (Alu core
6	1.546	0.91	0.69	PRDX5_HUMAN	Peroxiredoxin-5, mitochondrial precursor (EC 1.11.1.15) (Prx-V) (Peroxisomal antioxidant enzyme) (PLP) (Thioredoxin reductase) (Thioredoxin peroxidase PMP20) (Antioxidant enzyme B166) (AOEB166) (TPx type VI) (Liver tissue 2D-page spot 71B) (Alu core
1	0.999	0.889	1.088	PRDX6_HUMAN	Peroxiredoxin-6 (EC 1.11.1.15) (Antioxidant protein 2) (1-Cys peroxiredoxin) (1-Cys PRX) (Acidic calcium-independent phospholipase A2) (EC 3.1.1.-) (aiPLA2) (Non-selenium glutathione peroxidase) (EC 1.11.1.7) (NSGPx) (24 kDa protein) (Liver 2D page
2	0.847	0.758	1.499	PRDX6_HUMAN	Peroxiredoxin-6 (EC 1.11.1.15) (Antioxidant protein 2) (1-Cys peroxiredoxin) (1-Cys PRX) (Acidic calcium-independent phospholipase A2) (EC 3.1.1.-) (aiPLA2) (Non-selenium glutathione peroxidase) (EC 1.11.1.7) (NSGPx) (24 kDa protein) (Liver 2D page
3	1.344	1.029	0.958	PRDX6_HUMAN	Peroxiredoxin-6 (EC 1.11.1.15) (Antioxidant protein 2) (1-Cys peroxiredoxin) (1-Cys PRX) (Acidic calcium-independent phospholipase A2) (EC 3.1.1.-) (aiPLA2) (Non-selenium glutathione peroxidase) (EC 1.11.1.7) (NSGPx) (24 kDa protein) (Liver 2D page
1	1.071	0.799	1.129	PROF1_HUMAN	Profilin-1 (Profilin I) - Homo sapiens (Human)
2	1.072	0.646	1.39	PROF1_HUMAN	Profilin-1 (Profilin I) - Homo sapiens (Human)
3	1.206	0.605	1.814	PROF1_HUMAN	Profilin-1 (Profilin I) - Homo sapiens (Human)
4	1.132	0.835	1.003	PROF1_HUMAN	Profilin-1 (Profilin I) - Homo sapiens (Human)
5	0.707	0.458	3.283	PROF1_HUMAN	Profilin-1 (Profilin I) - Homo sapiens (Human)
6	3.371	0.321	0.898	PROF1_HUMAN	Profilin-1 (Profilin I) - Homo sapiens (Human)
2	0.885	0.859	1.266	PRPS1_HUMAN	Ribose-phosphate pyrophosphokinase I (EC 2.7.6.1) (Phosphoribosyl pyrophosphate synthetase I) (PRS-I) (PPRibP) - Homo sapiens (Human)
5	0.842	1.298	0.973	PRS7_HUMAN	26S protease regulatory subunit 7 (Proteasome 26S subunit ATPase 2) (Protein MSS1) - Homo sapiens (Human)
5	1.657	1.489	0.431	PSA1_HUMAN	Proteasome subunit alpha type 1 (EC 3.4.25.1) (Proteasome component C2) (Macropain subunit C2) (Multicatalytic endopeptidase complex subunit C2) (Proteasome nu chain) (30 kDa prosomal protein) (PROS-30) - Homo sapiens (Human)
6	1.066	1.455	0.626	PSA1_HUMAN	Proteasome subunit alpha type 1 (EC 3.4.25.1) (Proteasome component C2) (Macropain subunit C2) (Multicatalytic endopeptidase complex subunit C2) (Proteasome nu chain) (30 kDa prosomal protein) (PROS-30) - Homo sapiens (Human)
1	0.95	1.122	0.906	PSB10_HUMAN	Proteasome subunit beta type 10 precursor (EC 3.4.25.1) (Proteasome MECl-1) (Macropain subunit MECl-1) (Multicatalytic endopeptidase complex subunit MECl-1) - Homo sapiens (Human)
6	0.431	1.409	1.599	PSB2_HUMAN	Proteasome subunit beta type 2 (EC 3.4.25.1) (Proteasome component C7-I) (Macropain subunit C7-I) (Multicatalytic endopeptidase complex subunit C7-I) - Homo sapiens (Human)
6	0.956	0.927	1.095	PSB9_HUMAN	Proteasome subunit beta type 9 precursor (EC 3.4.25.1) (Proteasome chain 7) (Macropain chain 7) (Multicatalytic endopeptidase complex chain 7) (RING12 protein) (Low molecular mass protein 2) - Homo sapiens (Human)
2	0.637	0.845	1.788	PSD10_HUMAN	26S proteasome non-ATPase regulatory subunit 10 (26S proteasome regulatory subunit p28) (Gankyrin) - Homo sapiens (Human)
5	1.441	1.698	0.435	PSIP1_HUMAN	PC4 and SFRS1-interacting protein (Lens epithelium-derived growth factor) (Transcriptional coactivator p75/p52) (Dense fine speckles 70 kDa protein) (DFS 70) (CLL-associated antigen KW-7) - Homo sapiens (Human)
2	1.036	0.936	0.992	PSMD2_HUMAN	26S proteasome non-ATPase regulatory subunit 2 (26S proteasome regulatory subunit RPN1) (26S proteasome regulatory subunit S2) (26S proteasome subunit p97) (Tumor necrosis factor type 1 receptor-associated protein 2) (55.11 protein) - Homo sapiens (
6	0.737	1.037	1.269	PSMD2_HUMAN	26S proteasome non-ATPase regulatory subunit 2 (26S proteasome regulatory subunit RPN1) (26S proteasome regulatory subunit S2) (26S proteasome subunit p97) (Tumor necrosis factor type 1 receptor-associated protein 2) (55.11 protein) - Homo sapiens (
4	0.958	1.375	0.719	PSME1_HUMAN	Proteasome activator complex subunit 1 (Proteasome activator 28-alpha subunit) (PA28alpha) (PA28a) (Activator of multicatalytic protease subunit 1) (11S regulator complex subunit alpha) (REG-alpha) (Interferon gamma up-regulated I-5111 protein) (IGU
5	0.479	−11.38	−0.195	PSME1_HUMAN	Proteasome activator complex subunit 1 (Proteasome activator 28-alpha subunit) (PA28alpha) (PA28a) (Activator of multicatalytic protease subunit 1) (11S regulator complex subunit alpha) (REG-alpha) (Interferon gamma up-regulated I-5111 protein) (IGU
6	1.766	0.408	1.349	PSME1_HUMAN	Proteasome activator complex subunit 1 (Proteasome activator 28-alpha subunit) (PA28alpha) (PA28a) (Activator of multicatalytic protease subunit 1) (11S regulator complex subunit alpha) (REG-alpha) (Interferon gamma up-regulated I-5111 protein) (IGU
1	0.972	2.079	0.478	PTBP1_HUMAN	Polypyrimidine tract-binding protein 1 (PTB) (Heterogeneous nuclear ribonucleoprotein I) (hnRNP I) (57 kDa RNA-binding protein PPTB-1) - Homo sapiens (Human)
2	0.787	1.17	1.044	PTBP1_HUMAN	Polypyrimidine tract-binding protein 1 (PTB) (Heterogeneous nuclear ribonucleoprotein I) (hnRNP I) (57 kDa RNA-binding protein PPTB-1) - Homo sapiens (Human)
3	0.837	−21.539	−0.073	PTBP1_HUMAN	Polypyrimidine tract-binding protein 1 (PTB) (Heterogeneous nuclear ribonucleoprotein I) (hnRNP I) (57 kDa RNA-binding protein PPTB-1) - Homo sapiens (Human)
5	0.975	1.279	0.853	PTBP1_HUMAN	Polypyrimidine tract-binding protein 1 (PTB) (Heterogeneous nuclear ribonucleoprotein I) (hnRNP I) (57 kDa RNA-binding protein PPTB-1) - Homo sapiens (Human)
6	0.836	1.107	1.048	PTK7_HUMAN	Tyrosine-protein kinase-like 7 precursor (Colon carcinoma kinase 4) (CCK-4) - Homo sapiens (Human)
1	0.608	1.46	1.051	PTMA_HUMAN	Prothymosin alpha [Contains: Thymosin alpha-1] - Homo sapiens (Human)
2	1.041	0.577	1.601	PTMA_HUMAN	Prothymosin alpha [Contains: Thymosin alpha-1] - Homo sapiens (Human)
3	0.388	2.744	1.244	PTMA_HUMAN	Prothymosin alpha [Contains: Thymosin alpha-1] - Homo sapiens (Human)
4	0.89	2.225	0.479	PTMA_HUMAN	Prothymosin alpha [Contains: Thymosin alpha-1] - Homo sapiens (Human)
5	0.845	0.473	2.663	PTMA_HUMAN	Prothymosin alpha [Contains: Thymosin alpha-1] - Homo sapiens (Human)
6	3.072	0.356	0.886	PTMA_HUMAN	Prothymosin alpha [Contains: Thymosin alpha-1] - Homo sapiens (Human)
1	0.908	1.11	0.958	PTN6_HUMAN	Tyrosine-protein phosphatase non-receptor type 6 (EC 3.1.3.48) (Protein-tyrosine phosphatase 1C) (PTP-1C) (Hematopoietic cell protein-tyrosine phosphatase) (SH-PTP1) (Protein-tyrosine phosphatase SHP-1) - Homo sapiens (Human)
3	0.77	1.151	1.495	PTN6_HUMAN	Tyrosine-protein phosphatase non-receptor type 6 (EC 3.1.3.48) (Protein-tyrosine phosphatase 1C) (PTP-1C) (Hematopoietic cell protein-tyrosine phosphatase) (SH-PTP1) (Protein-tyrosine phosphatase SHP-1) - Homo sapiens (Human)
2	0.93	1.054	0.981	PUR9_HUMAN	Bifunctional purine biosynthesis protein PURH [Includes: Phosphoribosylaminoimidazolecarboxamide formyltransferase (EC 2.1.2.3) (5-aminoimidazole-4-carboxamide ribonucleotide formyltransferase) (AICAR transformylase); IMP cyclohydrolase (EC 3.5.4.10
6	0.415	0.726	3.224	RAB1B_HUMAN	Ras-related protein Rab-1B - Homo sapiens (Human)
2	1.488	1.044	0.619	RAC1_HUMAN	Ras-related C3 botulinum toxin substrate 1 precursor (p21-Rac1) (Ras-like protein TC25) - Homo sapiens (Human)
1	0.797	0.869	1.412	RAC2_HUMAN	Ras-related C3 botulinum toxin substrate 2 precursor (p21-Rac2) (Small G protein) (GX) - Homo sapiens (Human)
2	1.382	0.953	0.73	RAC2_HUMAN	Ras-related C3 botulinum toxin substrate 2 precursor (p21-Rac2) (Small G protein) (GX) - Homo sapiens (Human)
4	1.078	0.955	0.921	RAC2_HUMAN	Ras-related C3 botulinum toxin substrate 2 precursor (p21-Rac2) (Small G protein) (GX) - Homo sapiens (Human)
5	0.874	0.301	4.042	RAC2_HUMAN	Ras-related C3 botulinum toxin substrate 2 precursor (p21-Rac2) (Small G protein) (GX) - Homo sapiens (Human)
6	5.667	0.132	1.293	RAC2_HUMAN	Ras-related C3 botulinum toxin substrate 2 precursor (p21-Rac2) (Small G protein) (GX) - Homo sapiens (Human)
1	1.127	1.4	0.612	RALY_HUMAN	RNA-binding protein Raly (hnRNP associated with lethal yellow homolog) (Autoantigen p542) - Homo sapiens (Human)
6	0.244	2.337	1.702	RALY_HUMAN	RNA-binding protein Raly (hnRNP associated with lethal yellow homolog) (Autoantigen p542) - Homo sapiens (Human)
1	0.942	2.933	0.35	RAN_HUMAN	GTP-binding nuclear protein Ran (GTPase Ran) (Ras-like protein TC4) (Androgen receptor-associated protein 24) - Homo sapiens (Human)
2	1.59	1.611	0.376	RAN_HUMAN	GTP-binding nuclear protein Ran (GTPase Ran) (Ras-like protein TC4) (Androgen receptor-associated protein 24) - Homo sapiens (Human)
3	−0.149	−18.593	0.479	RAN_HUMAN	GTP-binding nuclear protein Ran (GTPase Ran) (Ras-like protein TC4) (Androgen receptor-associated protein 24) - Homo sapiens (Human)
5	1.788	0.442	1.346	RAN_HUMAN	GTP-binding nuclear protein Ran (GTPase Ran) (Ras-like protein TC4) (Androgen receptor-associated protein 24) - Homo sapiens (Human)
5	0.676	0.901	1.746	RANB3_HUMAN	Ran-binding protein 3 (RanBP3) - Homo sapiens (Human)
6	2.291	1.14	0.371	RANB3_HUMAN	Ran-binding protein 3 (RanBP3) - Homo sapiens (Human)
1	1.375	0.44	1.597	RB11A_HUMAN	Ras-related protein Rab-11A (Rab-11) (YL8) - Homo sapiens (Human)
5	−11.641	−0.127	0.72	RBM12_HUMAN	RNA-binding protein 12 (RNA-binding motif protein 12) (SH3/WW domain anchor protein in the nucleus) (SWAN) - Homo sapiens (Human)
5	0.882	2.331	0.517	RBM14_HUMAN	RNA-binding protein 14 (RNA-binding motif protein 14) (RRM-containing coactivator activator/modulator) (Synaptotagmin-interacting protein) (SYT-interacting protein) - Homo sapiens (Human)
6	−−−	−−−	−−−	RBM14_HUMAN	RNA-binding protein 14 (RNA-binding motif protein 14) (RRM-containing coactivator activator/modulator) (Synaptotagmin-interacting protein) (SYT-interacting protein) - Homo sapiens (Human)
4	1.282	1.236	0.598	RBM25_HUMAN	Probable RNA-binding protein 25 (RNA-binding motif protein 25) (RNA-binding region-containing protein 7) (Protein S164) - Homo sapiens (Human)
5	0.818	1.572	0.827	RBM25_HUMAN	Probable RNA-binding protein 25 (RNA-binding motif protein 25) (RNA-binding region-containing protein 7) (Protein S164) - Homo sapiens (Human)
6	0.313	2.722	1.139	RBM25_HUMAN	Probable RNA-binding protein 25 (RNA-binding motif protein 25) (RNA-binding region-containing protein 7) (Protein S164) - Homo sapiens (Human)
1	0.845	1.364	0.838	RBM8A_HUMAN	RNA-binding protein 8A (RNA-binding motif protein 8A) (Ribonucleoprotein RBM8A) (RNA-binding protein Y14) (Binder of OVCA1-1) (BOV-1) - Homo sapiens (Human)
3	0.733	2.073	0.872	RBM8A_HUMAN	RNA-binding protein 8A (RNA-binding motif protein 8A) (Ribonucleoprotein RBM8A) (RNA-binding protein Y14) (Binder of OVCA1-1) (BOV-1) - Homo sapiens (Human)
6	1.147	0.978	0.865	RBM8A_HUMAN	RNA-binding protein 8A (RNA-binding motif protein 8A) (Ribonucleoprotein RBM8A) (RNA-binding protein Y14) (Binder of OVCA1-1) (BOV-1) - Homo sapiens (Human)
2	1.168	0.787	1.046	RD23B_HUMAN	UV excision repair protein RAD23 homolog B (hHR23B) (XP-C repair-complementing complex 58 kDa protein) (p58) - Homo sapiens (Human)
3	−0.103	2.859	−4.49	RD23B_HUMAN	UV excision repair protein RAD23 homolog B (hHR23B) (XP-C repair-complementing complex 58 kDa protein) (p58) - Homo sapiens (Human)
5	0.997	1.117	0.955	RD23B_HUMAN	UV excision repair protein RAD23 homolog B (hHR23B) (XP-C repair-complementing complex 58 kDa protein) (p58) - Homo sapiens (Human)
6	1.076	1.303	0.692	RD23B_HUMAN	UV excision repair protein RAD23 homolog B (hHR23B) (XP-C repair-complementing complex 58 kDa protein) (p58) - Homo sapiens (Human)
5	0.737	1.978	0.729	RED_HUMAN	Protein Red (Protein RER) (IK factor) (Cytokine IK) - Homo sapiens (Human)
6	1.413	1.167	0.588	REPS1_HUMAN	RalBP1-associated Eps domain-containing protein 1 (RalBP1-interacting protein 1) - Homo sapiens (Human)
2	1.183	0.707	1.15	RHG25_HUMAN	Rho GTPase-activating protein 25 - Homo sapiens (Human)
1	0.943	0.61	1.68	RHOA_HUMAN	Transforming protein RhoA precursor (H12) - Homo sapiens (Human)
3	1.485	0.652	1.368	RHOA_HUMAN	Transforming protein RhoA precursor (H12) - Homo sapiens (Human)
3	0.979	2.326	0.581	RL10A_HUMAN	60S ribosomal protein L10a (CSA-19) - Homo sapiens (Human)
6	0.473	1.258	1.63	RL10A_HUMAN	60S ribosomal protein L10a (CSA-19) - Homo sapiens (Human)
2	0.824	1.349	0.865	RL10L_HUMAN	60S ribosomal protein L10-like - Homo sapiens (Human)
6	0.323	2.396	1.255	RL12_HUMAN	60S ribosomal protein L12 - Homo sapiens (Human)
2	0.789	1.605	0.76	RL14_HUMAN	60S ribosomal protein L14 (CAG-ISL 7) - Homo sapiens (Human)
6	0.485	2.404	0.833	RL14_HUMAN	60S ribosomal protein L14 (CAG-ISL 7) - Homo sapiens (Human)
3	0.901	1.973	0.745	RL15_HUMAN	60S ribosomal protein L15 - Homo sapiens (Human)
4	1.363	1.363	0.51	RL15_HUMAN	60S ribosomal protein L15 - Homo sapiens (Human)
1	1.596	0.994	0.609	RL18_HUMAN	60S ribosomal protein L18 - Homo sapiens (Human)
3	1.288	0.819	1.255	RL18_HUMAN	60S ribosomal protein L18 - Homo sapiens (Human)
4	1.105	1.359	0.631	RL18_HUMAN	60S ribosomal protein L18 - Homo sapiens (Human)
5	1.024	1.507	0.689	RL18_HUMAN	60S ribosomal protein L18 - Homo sapiens (Human)
2	0.817	1.152	1.022	RL1D1_HUMAN	Ribosomal L1 domain-containing protein 1 (Cellular senescence-inhibited gene protein) (Protein PBK1) (CATX-11) - Homo sapiens (Human)
6	0.42	1.221	1.892	RL21_HUMAN	60S ribosomal protein L21 - Homo sapiens (Human)
6	0.226	1.736	2.473	RL23_HUMAN	60S ribosomal protein L23 (Ribosomal protein L17) - Homo sapiens (Human)
2	0.751	1.071	1.196	RL26L_HUMAN	60S ribosomal protein L26-like 1 - Homo sapiens (Human)
2	0.798	1.226	0.983	RL27_HUMAN	60S ribosomal protein L27 - Homo sapiens (Human)
5	0.91	1.683	0.694	RL27A_HUMAN	60S ribosomal protein L27a - Homo sapiens (Human)
5	1.354	1.085	0.723	RL28_HUMAN	60S ribosomal protein L28 - Homo sapiens (Human)
6	0.215	1.347	3.353	RL28_HUMAN	60S ribosomal protein L28 - Homo sapiens (Human)
5	0.788	1.843	0.732	RL30_HUMAN	60S ribosomal protein L30 - Homo sapiens (Human)
5	0.608	1.094	1.598	RL31_HUMAN	60S ribosomal protein L31 - Homo sapiens (Human)
2	0.936	0.901	1.14	RL32_HUMAN	60S ribosomal protein L32 - Homo sapiens (Human)
2	0.812	1.262	0.939	RL34_HUMAN	60S ribosomal protein L34 - Homo sapiens (Human)
2	0.768	0.625	2.003	RL36_HUMAN	60S ribosomal protein L36 - Homo sapiens (Human)
5	0.511	1.129	1.841	RL36_HUMAN	60S ribosomal protein L36 - Homo sapiens (Human)
2	0.758	1.43	0.887	RL37_HUMAN	60S ribosomal protein L37 (G1.16) - Homo sapiens (Human)
2	0.745	1.278	1.011	RL37A_HUMAN	60S ribosomal protein L37a - Homo sapiens (Human)
2	1.055	1.173	0.777	RL4_HUMAN	60S ribosomal protein L4 (L1) - Homo sapiens (Human)
5	0.802	1.315	1.008	RL4_HUMAN	60S ribosomal protein L4 (L1) - Homo sapiens (Human)
1	0.886	1.574	0.693	RL5_HUMAN	60S ribosomal protein L5 - Homo sapiens (Human)
6	0.226	1.336	3.208	RL5_HUMAN	60S ribosomal protein L5 - Homo sapiens (Human)
2	0.69	1.021	1.365	RL6_HUMAN	60S ribosomal protein L6 (TAX-responsive enhancer element-binding protein 107) (TAXREB107) (Neoplasm-related protein C140) - Homo sapiens (Human)
5	0.923	1.601	0.72	RL6_HUMAN	60S ribosomal protein L6 (TAX-responsive enhancer element-binding protein 107) (TAXREB107) (Neoplasm-related protein C140) - Homo sapiens (Human)
6	0.894	1.15	0.944	RL6_HUMAN	60S ribosomal protein L6 (TAX-responsive enhancer element-binding protein 107) (TAXREB107) (Neoplasm-related protein C140) - Homo sapiens (Human)
2	0.93	1.418	0.729	RL7_HUMAN	60S ribosomal protein L7 - Homo sapiens (Human)
1	0.985	1.783	0.55	RL7A_HUMAN	60S ribosomal protein L7a (Surfeit locus protein 3) (PLA-X polypeptide) - Homo sapiens (Human)
5	0.572	2.169	0.857	RL7A_HUMAN	60S ribosomal protein L7a (Surfeit locus protein 3) (PLA-X polypeptide) - Homo sapiens (Human)
6	0.945	0.75	1.369	RL7A_HUMAN	60S ribosomal protein L7a (Surfeit locus protein 3) (PLA-X polypeptide) - Homo sapiens (Human)
2	0.867	1.344	0.826	RL8_HUMAN	60S ribosomal protein L8 - Homo sapiens (Human)
3	0.911	1.517	0.958	RL8_HUMAN	60S ribosomal protein L8 - Homo sapiens (Human)
5	0.561	1.699	1.115	RL8_HUMAN	60S ribosomal protein L8 - Homo sapiens (Human)
6	0.922	1.086	1.209	RL8_HUMAN	60S ribosomal protein L8 - Homo sapiens (Human)
6	1.028	1.233	0.766	RLA1_HUMAN	60S acidic ribosomal protein P1 - Homo sapiens (Human)
2	−−−	−−−	−−−	RLA2_HUMAN	60S acidic ribosomal protein P2 (Renal carcinoma antigen NY-REN-44) - Homo sapiens (Human)
5	1.228	0.642	1.349	RLA2_HUMAN	60S acidic ribosomal protein P2 (Renal carcinoma antigen NY-REN-44) - Homo sapiens (Human)
6	−0.078	1.898	−6.554	RLA2_HUMAN	60S acidic ribosomal protein P2 (Renal carcinoma antigen NY-REN-44) - Homo sapiens (Human)
6	0.105	7.751	1.187	ROA0_HUMAN	Heterogeneous nuclear ribonucleoprotein A0 (hnRNP A0) - Homo sapiens (Human)
1	0.85	0.946	1.201	ROA1_HUMAN	Heterogeneous nuclear ribonucleoprotein A1 (Helix-destabilizing protein) (Single-strand RNA-binding protein) (hnRNP core protein A1) - Homo sapiens (Human)
2	0.96	1.159	0.864	ROA1_HUMAN	Heterogeneous nuclear ribonucleoprotein A1 (Helix-destabilizing protein) (Single-strand RNA-binding protein) (hnRNP core protein A1) - Homo sapiens (Human)
4	0.896	1.932	0.548	ROA1_HUMAN	Heterogeneous nuclear ribonucleoprotein A1 (Helix-destabilizing protein) (Single-strand RNA-binding protein) (hnRNP core protein A1) - Homo sapiens (Human)
5	0.794	1.774	0.755	ROA1_HUMAN	Heterogeneous nuclear ribonucleoprotein A1 (Helix-destabilizing protein) (Single-strand RNA-binding protein) (hnRNP core protein A1) - Homo sapiens (Human)
6	0.956	2.415	0.42	ROA1_HUMAN	Heterogeneous nuclear ribonucleoprotein A1 (Helix-destabilizing protein) (Single-strand RNA-binding protein) (hnRNP core protein A1) - Homo sapiens (Human)
1	0.815	1.387	0.863	ROA2_HUMAN	Heterogeneous nuclear ribonucleoproteins A2/B1 (hnRNP A2 / hnRNP B1) - Homo sapiens (Human)
2	0.791	0.899	1.352	ROA2_HUMAN	Heterogeneous nuclear ribonucleoproteins A2/B1 (hnRNP A2 / hnRNP B1) - Homo sapiens (Human)
3	1.069	2.556	0.484	ROA2_HUMAN	Heterogeneous nuclear ribonucleoproteins A2/B1 (hnRNP A2 / hnRNP B1) - Homo sapiens (Human)
4	1.059	1.437	0.622	ROA2_HUMAN	Heterogeneous nuclear ribonucleoproteins A2/B1 (hnRNP A2 / hnRNP B1) - Homo sapiens (Human)
5	0.616	1.835	1.044	ROA2_HUMAN	Heterogeneous nuclear ribonucleoproteins A2/B1 (hnRNP A2 / hnRNP B1) - Homo sapiens (Human)
6	0.377	3.112	0.818	ROA2_HUMAN	Heterogeneous nuclear ribonucleoproteins A2/B1 (hnRNP A2 / hnRNP B1) - Homo sapiens (Human)
2	0.784	1.031	1.19	ROA3_HUMAN	Heterogeneous nuclear ribonucleoprotein A3 (hnRNP A3) - Homo sapiens (Human)
3	2.199	1.524	0.395	ROA3_HUMAN	Heterogeneous nuclear ribonucleoprotein A3 (hnRNP A3) - Homo sapiens (Human)
5	1.169	2.485	0.366	ROA3_HUMAN	Heterogeneous nuclear ribonucleoprotein A3 (hnRNP A3) - Homo sapiens (Human)
6	0.114	8.739	0.973	ROA3_HUMAN	Heterogeneous nuclear ribonucleoprotein A3 (hnRNP A3) - Homo sapiens (Human)
1	1.121	1.403	0.614	ROAA_HUMAN	Heterogeneous nuclear ribonucleoprotein A/B (hnRNP A/B) (APOBEC-1-binding protein 1) (ABBP-1) - Homo sapiens (Human)
4	0.931	5.064	0.201	ROAA_HUMAN	Heterogeneous nuclear ribonucleoprotein A/B (hnRNP A/B) (APOBEC-1-binding protein 1) (ABBP-1) - Homo sapiens (Human)
2	0.754	0.986	1.295	RPB2_HUMAN	DNA-directed RNA polymerase II 140 kDa polypeptide (EC 2.7.7.6) (RNA polymerase II subunit 2) (RPB2) - Homo sapiens (Human)
2	0.417	1.325	1.742	RS11_HUMAN	40S ribosomal protein S11 - Homo sapiens (Human)	0.98502
1	0.932	1.297	0.799	RS12_HUMAN	40S ribosomal protein S12 - Homo sapiens (Human)
2	0.921	1.18	0.886	RS13_HUMAN	40S ribosomal protein S13 - Homo sapiens (Human)
3	1.488	2.034	0.438	RS13_HUMAN	40S ribosomal protein S13 - Homo sapiens (Human)
4	1.11	1.17	0.73	RS13_HUMAN	40S ribosomal protein S13 - Homo sapiens (Human)
5	1.298	1.412	0.58	RS13_HUMAN	40S ribosomal protein S13 - Homo sapiens (Human)
6	1.528	0.877	0.724	RS13_HUMAN	40S ribosomal protein S13 - Homo sapiens (Human)
1	1.369	1.1	0.641	RS14_HUMAN	40S ribosomal protein S14 - Homo sapiens (Human)
2	0.841	1.332	0.859	RS14_HUMAN	40S ribosomal protein S14 - Homo sapiens (Human)
3	1.469	1.043	0.865	RS14_HUMAN	40S ribosomal protein S14 - Homo sapiens (Human)
4	1.033	1.691	0.543	RS14_HUMAN	40S ribosomal protein S14 - Homo sapiens (Human)
5	1.144	1.666	0.558	RS14_HUMAN	40S ribosomal protein S14 - Homo sapiens (Human)
6	1.015	0.861	1.111	RS14_HUMAN	40S ribosomal protein S14 - Homo sapiens (Human)
1	0.988	0.829	1.18	RS16_HUMAN	40S ribosomal protein S16 - Homo sapiens (Human)
2	0.67	1.137	1.263	RS16_HUMAN	40S ribosomal protein S16 - Homo sapiens (Human)
4	1.229	1.209	0.638	RS16_HUMAN	40S ribosomal protein S16 - Homo sapiens (Human)
5	0.68	0.807	1.937	RS16_HUMAN	40S ribosomal protein S16 - Homo sapiens (Human)
2	0.845	0.858	1.328	RS18_HUMAN	40S ribosomal protein S18 (Ke-3) (Ke3) - Homo sapiens (Human)
2	0.73	1.132	1.164	RS19_HUMAN	40S ribosomal protein S19 - Homo sapiens (Human)
3	1.391	1.041	0.915	RS19_HUMAN	40S ribosomal protein S19 - Homo sapiens (Human)
5	0.547	2.148	0.906	RS19_HUMAN	40S ribosomal protein S19 - Homo sapiens (Human)
6	0.834	0.544	1.352	RS19_HUMAN	40S ribosomal protein S19 - Homo sapiens (Human)
2	1.211	0.699	1.136	RS2_HUMAN	40S ribosomal protein S2 (S4) (LLRep3 protein) - Homo sapiens (Human)
5	1.143	1.293	0.719	RS2_HUMAN	40S ribosomal protein S2 (S4) (LLRep3 protein) - Homo sapiens (Human)
3	0.633	1.356	1.542	RS21_HUMAN	40S ribosomal protein S21 - Homo sapiens (Human)
5	0.584	1.687	1.08	RS21_HUMAN	40S ribosomal protein S21 - Homo sapiens (Human)
6	0.871	1.611	0.692	RS21_HUMAN	40S ribosomal protein S21 - Homo sapiens (Human)
5	1.003	1.034	1.025	RS26L_HUMAN	40S ribosomal protein S26-like 1 - Homo sapiens (Human)
1	0.57	1.479	1.146	RS28_HUMAN	40S ribosomal protein S28 - Homo sapiens (Human)
3	0.783	1.195	1.416	RS28_HUMAN	40S ribosomal protein S28 - Homo sapiens (Human)
5	0.502	1.128	1.877	RS28_HUMAN	40S ribosomal protein S28 - Homo sapiens (Human)
6	0.838	1.116	1.038	RS28_HUMAN	40S ribosomal protein S28 - Homo sapiens (Human)
2	0.667	0.627	2.3	RS30_HUMAN	40S ribosomal protein S30 - Homo sapiens (Human)
1	1.055	1.729	0.53	RS3A_HUMAN	40S ribosomal protein S3a - Homo sapiens (Human)
2	0.95	0.708	1.431	RS3A_HUMAN	40S ribosomal protein S3a - Homo sapiens (Human)
5	0.927	1.434	0.8	RS3A_HUMAN	40S ribosomal protein S3a - Homo sapiens (Human)
2	0.825	1.411	0.826	RS4X_HUMAN	40S ribosomal protein S4, X isoform (Single copy abundant mRNA protein) (SCR10) - Homo sapiens (Human)
5	1.033	1.727	0.596	RS4X_HUMAN	40S ribosomal protein S4, X isoform (Single copy abundant mRNA protein) (SCR10) - Homo sapiens (Human)
6	1.21	0.78	1.028	RS4X_HUMAN	40S ribosomal protein S4, X isoform (Single copy abundant mRNA protein) (SCR10) - Homo sapiens (Human)
6	1.502	0.455	1.419	RS5_HUMAN	40S ribosomal protein S5 - Homo sapiens (Human)
1	1.08	1.318	0.679	RS6_HUMAN	40S ribosomal protein S6 (Phosphoprotein NP33) - Homo sapiens (Human)
2	0.52	0.923	2.004	RS6_HUMAN	40S ribosomal protein S6 (Phosphoprotein NP33) - Homo sapiens (Human)
3	0.753	1.576	1.116	RS6_HUMAN	40S ribosomal protein S6 (Phosphoprotein NP33) - Homo sapiens (Human)
5	1.061	1.003	1	RS7_HUMAN	40S ribosomal protein S7 - Homo sapiens (Human)
5	0.79	1.472	0.914	RS8_HUMAN	40S ribosomal protein S8 - Homo sapiens (Human)
2	0.994	1.148	0.843	RS9_HUMAN	40S ribosomal protein S9 - Homo sapiens (Human)
1	0.956	1.681	0.601	RSSA_HUMAN	40S ribosomal protein SA (p40) (34/67 kDa laminin receptor) (Colon carcinoma laminin-binding protein) (NEM/1CHD4) (Multidrug resistance-associated protein MGr1-Ag) - Homo sapiens (Human)
2	0.876	0.774	1.418	RSSA_HUMAN	40S ribosomal protein SA (p40) (34/67 kDa laminin receptor) (Colon carcinoma laminin-binding protein) (NEM/1CHD4) (Multidrug resistance-associated protein MGr1-Ag) - Homo sapiens (Human)
5	0.528	1.597	1.261	RSSA_HUMAN	40S ribosomal protein SA (p40) (34/67 kDa laminin receptor) (Colon carcinoma laminin-binding protein) (NEM/1CHD4) (Multidrug resistance-associated protein MGr1-Ag) - Homo sapiens (Human)
6	2.339	0.705	0.589	RSSA_HUMAN	40S ribosomal protein SA (p40) (34/67 kDa laminin receptor) (Colon carcinoma laminin-binding protein) (NEM/1CHD4) (Multidrug resistance-associated protein MGr1-Ag) - Homo sapiens (Human)
1	1	1.213	0.796	S10A4_HUMAN	Protein S100-A4 (S100 calcium-binding protein A4) (Metastasin) (Protein Mts1) (Placental calcium-binding protein) (Calvasculin) - Homo sapiens (Human)
2	1.262	1.014	0.752	S10A4_HUMAN	Protein S100-A4 (S100 calcium-binding protein A4) (Metastasin) (Protein Mts1) (Placental calcium-binding protein) (Calvasculin) - Homo sapiens (Human)
3	1.153	1.641	0.7	S10A4_HUMAN	Protein S100-A4 (S100 calcium-binding protein A4) (Metastasin) (Protein Mts1) (Placental calcium-binding protein) (Calvasculin) - Homo sapiens (Human)
5	0.583	1.963	0.929	S10A4_HUMAN	Protein S100-A4 (S100 calcium-binding protein A4) (Metastasin) (Protein Mts1) (Placental calcium-binding protein) (Calvasculin) - Homo sapiens (Human)
6	1.338	1.067	0.679	S10A4_HUMAN	Protein S100-A4 (S100 calcium-binding protein A4) (Metastasin) (Protein Mts1) (Placental calcium-binding protein) (Calvasculin) - Homo sapiens (Human)
1	0.783	1.582	0.78	S10A6_HUMAN	Protein S100-A6 (S100 calcium-binding protein A6) (Calcyclin) (Prolactin receptor-associated protein) (PRA) (Growth factor-inducible protein 2A9) (MLN 4) - Homo sapiens (Human)
3	0.844	1.429	1.287	S10A6_HUMAN	Protein S100-A6 (S100 calcium-binding protein A6) (Calcyclin) (Prolactin receptor-associated protein) (PRA) (Growth factor-inducible protein 2A9) (MLN 4) - Homo sapiens (Human)
4	0.982	1.93	0.5	S10A6_HUMAN	Protein S100-A6 (S100 calcium-binding protein A6) (Calcyclin) (Prolactin receptor-associated protein) (PRA) (Growth factor-inducible protein 2A9) (MLN 4) - Homo sapiens (Human)
5	0.608	1.612	1.085	S10A6_HUMAN	Protein S100-A6 (S100 calcium-binding protein A6) (Calcyclin) (Prolactin receptor-associated protein) (PRA) (Growth factor-inducible protein 2A9) (MLN 4) - Homo sapiens (Human)
6	0.537	1.699	1.064	S10A6_HUMAN	Protein S100-A6 (S100 calcium-binding protein A6) (Calcyclin) (Prolactin receptor-associated protein) (PRA) (Growth factor-inducible protein 2A9) (MLN 4) - Homo sapiens (Human)
1	1.862	0.808	0.642	S10A8_HUMAN	Protein S100-A8 (S100 calcium-binding protein A8) (Calgranulin-A) (Migration inhibitory factor-related protein 8) (MRP-8) (Cystic fibrosis antigen) (CFAG) (P8) (Leukocyte L1 complex light chain) (Calprotectin L1L subunit) (Urinary stone protein band
5	2.936	−3.058	−0.118	S10A8_HUMAN	Protein S100-A8 (S100 calcium-binding protein A8) (Calgranulin-A) (Migration inhibitory factor-related protein 8) (MRP-8) (Cystic fibrosis antigen) (CFAG) (P8) (Leukocyte L1 complex light chain) (Calprotectin L1L subunit) (Urinary stone protein band
2	1.278	0.934	0.819	S10A9_HUMAN	Protein S100-A9 (S100 calcium-binding protein A9) (Calgranulin-B) (Migration inhibitory factor-related protein 14) (MRP-14) (P14) (Leukocyte L1 complex heavy chain) (Calprotectin L1H subunit) - Homo sapiens (Human)
4	0.991	1.643	0.582	S10A9_HUMAN	Protein S100-A9 (S100 calcium-binding protein A9) (Calgranulin-B) (Migration inhibitory factor-related protein 14) (MRP-14) (P14) (Leukocyte L1 complex heavy chain) (Calprotectin L1H subunit) - Homo sapiens (Human)
5	2.065	0.562	0.916	S10A9_HUMAN	Protein S100-A9 (S100 calcium-binding protein A9) (Calgranulin-B) (Migration inhibitory factor-related protein 14) (MRP-14) (P14) (Leukocyte L1 complex heavy chain) (Calprotectin L1H subunit) - Homo sapiens (Human)
3	2.243	3.088	0.191	S10AB_HUMAN	Protein S100-A11 (S100 calcium-binding protein A11) (Protein S100C) (Calgizzarin) (MLN 70) - Homo sapiens (Human)
5	0.935	1.693	0.672	SAFB1_HUMAN	Scaffold attachment factor B (Scaffold attachment factor B1) (SAF-B) (HSP27 estrogen response element-TATA box-binding protein) (HSP27 ERE-TATA-binding protein) - Homo sapiens (Human)
2	0.451	1.614	1.321	SAM68_HUMAN	KH domain-containing, RNA-binding, signal transduction-associated protein 1 (p21 Ras GTPase-activating protein-associated p62) (GAP-associated tyrosine phosphoprotein p62) (Src-associated in mitosis 68 kDa protein) (Sam68) (p68) - Homo sapiens (Huma
3	1.237	2.078	0.515	SART3_HUMAN	Squamous cell carcinoma antigen recognized by T-cells 3 (SART-3) (hSART-3) (Tat-interacting protein of 110 kDa) (Tip110) - Homo sapiens (Human)
6	1.335	−35.065	−0.021	SART3_HUMAN	Squamous cell carcinoma antigen recognized by T-cells 3 (SART-3) (hSART-3) (Tat-interacting protein of 110 kDa) (Tip110) - Homo sapiens (Human)
5	0.856	1.096	1.133	SC24C_HUMAN	Protein transport protein Sec24C (SEC24-related protein C) - Homo sapiens (Human)
1	1.282	0.052	20.561	SCYB7_HUMAN	Platelet basic protein precursor (PBP) (Small inducible cytokine B7) (CXCL7) (Leukocyte-derived growth factor) (LDGF) (Macrophage-derived growth factor) (MDGF) [Contains: Connective tissue-activating peptide III (CTAP-III) (Low-affinity platelet fac
2	1.003	0.172	5.581	SCYB7_HUMAN	Platelet basic protein precursor (PBP) (Small inducible cytokine B7) (CXCL7) (Leukocyte-derived growth factor) (LDGF) (Macrophage-derived growth factor) (MDGF) [Contains: Connective tissue-activating peptide III (CTAP-III) (Low-affinity platelet fac
3	0.95	0.151	9.256	SCYB7_HUMAN	Platelet basic protein precursor (PBP) (Small inducible cytokine B7) (CXCL7) (Leukocyte-derived growth factor) (LDGF) (Macrophage-derived growth factor) (MDGF) [Contains: Connective tissue-activating peptide III (CTAP-III) (Low-affinity platelet fac
5	0.805	0.357	3.701	SCYB7_HUMAN	Platelet basic protein precursor (PBP) (Small inducible cytokine B7) (CXCL7) (Leukocyte-derived growth factor) (LDGF) (Macrophage-derived growth factor) (MDGF) [Contains: Connective tissue-activating peptide III (CTAP-III) (Low-affinity platelet fac
6	0.906	0.238	4.491	SCYB7_HUMAN	Platelet basic protein precursor (PBP) (Small inducible cytokine B7) (CXCL7) (Leukocyte-derived growth factor) (LDGF) (Macrophage-derived growth factor) (MDGF) [Contains: Connective tissue-activating peptide III (CTAP-III) (Low-affinity platelet fac
5	0.863	1.349	0.913	SELH_HUMAN	Selenoprotein H - Homo sapiens (Human)
5	0.646	1.438	1.144	SET_HUMAN	Protein SET (Phosphatase 2A inhibitor I2PP2A) (I-2PP2A) (Template-activating factor I) (TAF-I) (HLA-DR-associated protein II) (PHAPII) (Inhibitor of granzyme A-activated DNase) (IGAAD) - Homo sapiens (Human)
6	0.371	1.151	2.273	SET_HUMAN	Protein SET (Phosphatase 2A inhibitor I2PP2A) (I-2PP2A) (Template-activating factor I) (TAF-I) (HLA-DR-associated protein II) (PHAPII) (Inhibitor of granzyme A-activated DNase) (IGAAD) - Homo sapiens (Human)
2	0.923	1.294	0.806	SF3B1_HUMAN	Splicing factor 3B subunit 1 (Spliceosome-associated protein 155) (SAP 155) (SF3b155) (Pre-mRNA-splicing factor SF3b 155 kDa subunit) - Homo sapiens (Human)
5	0.877	1.493	0.812	SF3B2_HUMAN	Splicing factor 3B subunit 2 (Spliceosome-associated protein 145) (SAP 145) (SF3b150) (Pre-mRNA-splicing factor SF3b 145 kDa subunit) - Homo sapiens (Human)
6	0.649	1.405	1.064	SF3B2_HUMAN	Splicing factor 3B subunit 2 (Spliceosome-associated protein 145) (SAP 145) (SF3b150) (Pre-mRNA-splicing factor SF3b 145 kDa subunit) - Homo sapiens (Human)
1	1.005	1.745	0.551	SFPQ_HUMAN	Splicing factor, proline- and glutamine-rich (Polypyrimidine tract-binding protein-associated-splicing factor) (PTB-associated-splicing factor) (PSF) (DNA-binding p52/p100 complex, 100 kDa subunit) (100 kDa DNA-pairing protein) (hPOMp100) - Homo sap
2	0.942	1.678	0.609	SFPQ_HUMAN	Splicing factor, proline- and glutamine-rich (Polypyrimidine tract-binding protein-associated-splicing factor) (PTB-associated-splicing factor) (PSF) (DNA-binding p52/p100 complex, 100 kDa subunit) (100 kDa DNA-pairing protein) (hPOMp100) - Homo sap
3	0.84	2.503	0.63	SFPQ_HUMAN	Splicing factor, proline- and glutamine-rich (Polypyrimidine tract-binding protein-associated-splicing factor) (PTB-associated-splicing factor) (PSF) (DNA-binding p52/p100 complex, 100 kDa subunit) (100 kDa DNA-pairing protein) (hPOMp100) - Homo sap
5	1.122	1.476	0.642	SFPQ_HUMAN	Splicing factor, proline- and glutamine-rich (Polypyrimidine tract-binding protein-associated-splicing factor) (PTB-associated-splicing factor) (PSF) (DNA-binding p52/p100 complex, 100 kDa subunit) (100 kDa DNA-pairing protein) (hPOMp100) - Homo sap
1	0.519	2.339	0.796	SFRS1_HUMAN	Splicing factor, arginine/serine-rich 1 (pre-mRNA-splicing factor SF2, P33 subunit) (Alternative-splicing factor 1) (ASF-1) - Homo sapiens (Human)
3	0.58	3.023	0.755	SFRS1_HUMAN	Splicing factor, arginine/serine-rich 1 (pre-mRNA-splicing factor SF2, P33 subunit) (Alternative-splicing factor 1) (ASF-1) - Homo sapiens (Human)
5	0.701	1.99	0.763	SFRS1_HUMAN	Splicing factor, arginine/serine-rich 1 (pre-mRNA-splicing factor SF2, P33 subunit) (Alternative-splicing factor 1) (ASF-1) - Homo sapiens (Human)
6	0.649	1.875	0.679	SFRS1_HUMAN	Splicing factor, arginine/serine-rich 1 (pre-mRNA-splicing factor SF2, P33 subunit) (Alternative-splicing factor 1) (ASF-1) - Homo sapiens (Human)
1	0.604	1.928	0.83	SFRS2_HUMAN	Splicing factor, arginine/serine-rich 2 (Splicing factor SC35) (SC-35) (Splicing component, 35 kDa) (Protein PR264) - Homo sapiens (Human)
6	0.838	1.2	0.965	SFRS2_HUMAN	Splicing factor, arginine/serine-rich 2 (Splicing factor SC35) (SC-35) (Splicing component, 35 kDa) (Protein PR264) - Homo sapiens (Human)
1	0.799	2.183	0.554	SFRS3_HUMAN	Splicing factor, arginine/serine-rich 3 (Pre-mRNA-splicing factor SRP20) - Homo sapiens (Human)
2	0.845	1.234	0.923	SFRS3_HUMAN	Splicing factor, arginine/serine-rich 3 (Pre-mRNA-splicing factor SRP20) - Homo sapiens (Human)
3	0.956	2.708	0.511	SFRS3_HUMAN	Splicing factor, arginine/serine-rich 3 (Pre-mRNA-splicing factor SRP20) - Homo sapiens (Human)
5	0.639	1.969	0.845	SFRS3_HUMAN	Splicing factor, arginine/serine-rich 3 (Pre-mRNA-splicing factor SRP20) - Homo sapiens (Human)
6	0.595	2.952	0.553	SFRS3_HUMAN	Splicing factor, arginine/serine-rich 3 (Pre-mRNA-splicing factor SRP20) - Homo sapiens (Human)
3	0.86	2.545	0.605	SFRS4_HUMAN	Splicing factor, arginine/serine-rich 4 (Pre-mRNA-splicing factor SRP75) (SRP001LB) - Homo sapiens (Human)
5	0.794	1.249	1.072	SFRS6_HUMAN	Splicing factor, arginine/serine-rich 6 (Pre-mRNA-splicing factor SRP55) - Homo sapiens (Human)
6	−0.167	0.54	−10.771	SFRS6_HUMAN	Splicing factor, arginine/serine-rich 6 (Pre-mRNA-splicing factor SRP55) - Homo sapiens (Human)
1	0.864	1.246	0.897	SFRS7_HUMAN	Splicing factor, arginine/serine-rich 7 (Splicing factor 9G8) - Homo sapiens (Human)
2	0.956	0.957	1.052	SFRS7_HUMAN	Splicing factor, arginine/serine-rich 7 (Splicing factor 9G8) - Homo sapiens (Human)
6	0.892	1.617	0.673	SFRS7_HUMAN	Splicing factor, arginine/serine-rich 7 (Splicing factor 9G8) - Homo sapiens (Human)
2	1.044	1.145	0.804	SH3K1_HUMAN	SH3 domain-containing kinase-binding protein 1 (Cbl-interacting protein of 85 kDa) (Human Src-family kinase-binding protein 1) (HSB-1) (CD2-binding protein 3) (CD2BP3) - Homo sapiens (Human)
2	0.712	0.681	1.984	SH3L1_HUMAN	SH3 domain-binding glutamic acid-rich-like protein - Homo sapiens (Human)
6	89.716	0.018	0.601	SH3L1_HUMAN	SH3 domain-binding glutamic acid-rich-like protein - Homo sapiens (Human)
1	0.735	0.828	1.588	SH3L3_HUMAN	SH3 domain-binding glutamic acid-rich-like protein 3 (SH3 domain-binding protein 1) (SH3BP-1) - Homo sapiens (Human)
3	0.419	0.899	3.515	SH3L3_HUMAN	SH3 domain-binding glutamic acid-rich-like protein 3 (SH3 domain-binding protein 1) (SH3BP-1) - Homo sapiens (Human)
5	1.264	0.311	2.705	SH3L3_HUMAN	SH3 domain-binding glutamic acid-rich-like protein 3 (SH3 domain-binding protein 1) (SH3BP-1) - Homo sapiens (Human)
6	6.573	0.171	0.864	SH3L3_HUMAN	SH3 domain-binding glutamic acid-rich-like protein 3 (SH3 domain-binding protein 1) (SH3BP-1) - Homo sapiens (Human)
1	0.833	1.017	1.141	SMD2_HUMAN	Small nuclear ribonucleoprotein Sm D2 (snRNP core protein D2) (Sm-D2) - Homo sapiens (Human)
3	0.769	−25.819	−0.067	SMD2_HUMAN	Small nuclear ribonucleoprotein Sm D2 (snRNP core protein D2) (Sm-D2) - Homo sapiens (Human)
5	0.874	2.361	0.515	SMD2_HUMAN	Small nuclear ribonucleoprotein Sm D2 (snRNP core protein D2) (Sm-D2) - Homo sapiens (Human)
6	1.594	1.56	0.39	SMD2_HUMAN	Small nuclear ribonucleoprotein Sm D2 (snRNP core protein D2) (Sm-D2) - Homo sapiens (Human)
5	1.137	1.018	0.918	SND1_HUMAN	Staphylococcal nuclease domain-containing protein 1 (p100 co-activator) (100 kDa coactivator) (EBNA2 coactivator p100) - Homo sapiens (Human)
2	1.228	0.842	0.93	SNG2_HUMAN	Synaptogyrin-2 (Cellugyrin) - Homo sapiens (Human)
3	0.816	1.182	1.374	SNG2_HUMAN	Synaptogyrin-2 (Cellugyrin) - Homo sapiens (Human)
5	0.773	1.239	1.11	SNG2_HUMAN	Synaptogyrin-2 (Cellugyrin) - Homo sapiens (Human)
1	0.804	0.827	1.453	SNP23_HUMAN	Synaptosomal-associated protein 23 (SNAP-23) (Vesicle-membrane fusion protein SNAP-23) - Homo sapiens (Human)
5	0.824	2.023	0.638	SNRPA_HUMAN	U1 small nuclear ribonucleoprotein A (U1 snRNP protein A) (U1A protein) (U1-A) - Homo sapiens (Human)
6	0.934	2.093	0.496	SNRPA_HUMAN	U1 small nuclear ribonucleoprotein A (U1 snRNP protein A) (U1A protein) (U1-A) - Homo sapiens (Human)
1	0.734	3.202	0.411	SODC_HUMAN	Superoxide dismutase [Cu-Zn] (EC 1.15.1.1) - Homo sapiens (Human)
5	3.08	0.484	0.713	SODC_HUMAN	Superoxide dismutase [Cu-Zn] (EC 1.15.1.1) - Homo sapiens (Human)
3	0.512	1.166	2.216	SPTB2_HUMAN	Spectrin beta chain, brain 1 (Spectrin, non-erythroid beta chain 1) (Beta-II spectrin) (Fodrin beta chain) - Homo sapiens (Human)
2	1.028	1.02	0.918	SQRD_HUMAN	Sulfide:quinone oxidoreductase, mitochondrial precursor (EC 1.-.-.-) - Homo sapiens (Human)
2	1.044	1.168	0.789	SRP14_HUMAN	Signal recognition particle 14 kDa protein (SRP14) (18 kDa Alu RNA-binding protein) - Homo sapiens (Human)
4	1.402	3.156	0.214	SRP14_HUMAN	Signal recognition particle 14 kDa protein (SRP14) (18 kDa Alu RNA-binding protein) - Homo sapiens (Human)
5	1.052	2.028	0.498	SRP14_HUMAN	Signal recognition particle 14 kDa protein (SRP14) (18 kDa Alu RNA-binding protein) - Homo sapiens (Human)
6	0.669	1.399	1.037	SRP14_HUMAN	Signal recognition particle 14 kDa protein (SRP14) (18 kDa Alu RNA-binding protein) - Homo sapiens (Human)
3	0.701	2.643	0.715	SRRM1_HUMAN	Serine/arginine repetitive matrix protein 1 (Ser/Arg-related nuclear matrix protein) (SR-related nuclear matrix protein of 160 kDa) (SRm160) - Homo sapiens (Human)
5	1.026	0.988	1.049	SRRM2_HUMAN	Serine/arginine repetitive matrix protein 2 (Serine/arginine-rich splicing factor-related nuclear matrix protein of 300 kDa) (Ser/Arg-related nuclear matrix protein) (SR-related nuclear matrix protein of 300 kDa) (Splicing coactivator subunit SRm300
3	2.208	0.661	0.908	SSB_HUMAN	Single-stranded DNA-binding protein, mitochondrial precursor (Mt-SSB) (MtSSB) (PWP1-interacting protein 17) - Homo sapiens (Human)
6	0.386	1.897	1.324	SSDH_HUMAN	Succinate semialdehyde dehydrogenase, mitochondrial precursor (EC 1.2.1.24) (NAD(+)-dependent succinic semialdehyde dehydrogenase) - Homo sapiens (Human)
2	−0.109	0.854	−10.291	STAT3_HUMAN	Signal transducer and activator of transcription 3 (Acute-phase response factor) - Homo sapiens (Human)
4	0.849	1.588	0.703	STIP1_HUMAN	Stress-induced-phosphoprotein 1 (STI1) (Hsc70/Hsp90-organizing protein) (Hop) (Transformation-sensitive protein IEF SSP 3521) (NY-REN-11 antigen) - Homo sapiens (Human)
5	0.76	1.152	1.215	STIP1_HUMAN	Stress-induced-phosphoprotein 1 (STI1) (Hsc70/Hsp90-organizing protein) (Hop) (Transformation-sensitive protein IEF SSP 3521) (NY-REN-11 antigen) - Homo sapiens (Human)
6	0.574	0.981	1.722	STIP1_HUMAN	Stress-induced-phosphoprotein 1 (STI1) (Hsc70/Hsp90-organizing protein) (Hop) (Transformation-sensitive protein IEF SSP 3521) (NY-REN-11 antigen) - Homo sapiens (Human)
5	0.57	0.958	1.948	STK4_HUMAN	Serine/threonine-protein kinase 4 (EC 2.7.11.1) (STE20-like kinase MST1) (MST-1) (Mammalian STE20-like protein kinase 1) (Serine/threonine-protein kinase Krs-2) - Homo sapiens (Human)
6	1.654	0.527	1.113	STK4_HUMAN	Serine/threonine-protein kinase 4 (EC 2.7.11.1) (STE20-like kinase MST1) (MST-1) (Mammalian STE20-like protein kinase 1) (Serine/threonine-protein kinase Krs-2) - Homo sapiens (Human)
1	0.709	2.164	0.63	STMN1_HUMAN	Stathmin (Phosphoprotein p19) (pp19) (Oncoprotein 18) (Op18) (Leukemia-associated phosphoprotein p18) (pp17) (Prosolin) (Metablastin) (Protein Pr22) - Homo sapiens (Human)
6	−0.059	2.802	−5.849	STX7_HUMAN	Syntaxin-7 - Homo sapiens (Human)
1	0.766	2.094	0.602	SUMO2_HUMAN	Small ubiquitin-related modifier 2 precursor (SUMO-2) (Ubiquitin-like protein SMT3B) (SMT3 homolog 2) (Sentrin-2) (HSMT3) (SUMO-3) - Homo sapiens (Human)
6	1.362	1.347	0.529	SUMO2_HUMAN	Small ubiquitin-related modifier 2 precursor (SUMO-2) (Ubiquitin-like protein SMT3B) (SMT3 homolog 2) (Sentrin-2) (HSMT3) (SUMO-3) - Homo sapiens (Human)
5	1.066	1.035	0.964	SWP70_HUMAN	Switch-associated protein 70 (SWAP-70) - Homo sapiens (Human)
6	0.757	0.898	1.428	SWP70_HUMAN	Switch-associated protein 70 (SWAP-70) - Homo sapiens (Human)
3	0.812	1.134	1.438	SYK_HUMAN	Lysyl-tRNA synthetase (EC 6.1.1.6) (Lysine--tRNA ligase) (LysRS) - Homo sapiens (Human)
2	1.601	0.353	1.703	TAGL2_HUMAN	Transgelin-2 (SM22-alpha homolog) - Homo sapiens (Human)
3	0.568	0.139	16.767	TAGL2_HUMAN	Transgelin-2 (SM22-alpha homolog) - Homo sapiens (Human)
5	0.954	0.368	3.029	TAGL2_HUMAN	Transgelin-2 (SM22-alpha homolog) - Homo sapiens (Human)
6	1.739	0.309	1.963	TAGL2_HUMAN	Transgelin-2 (SM22-alpha homolog) - Homo sapiens (Human)
1	0.995	1.347	0.721	TALDO_HUMAN	Transaldolase (EC 2.2.1.2) - Homo sapiens (Human)
2	1.354	1.024	0.694	TALDO_HUMAN	Transaldolase (EC 2.2.1.2) - Homo sapiens (Human)
3	1.052	1.044	1.205	TALDO_HUMAN	Transaldolase (EC 2.2.1.2) - Homo sapiens (Human)
5	0.803	1.315	1.007	TALDO_HUMAN	Transaldolase (EC 2.2.1.2) - Homo sapiens (Human)
6	0.981	0.992	0.998	TALDO_HUMAN	Transaldolase (EC 2.2.1.2) - Homo sapiens (Human)
1	1.23	0.448	1.753	TBA1_HUMAN	Tubulin alpha-1 chain (Alpha-tubulin 1) (Testis-specific alpha-tubulin) (Tubulin H2-alpha) - Homo sapiens (Human)
2	0.878	0.803	1.365	TBA1_HUMAN	Tubulin alpha-1 chain (Alpha-tubulin 1) (Testis-specific alpha-tubulin) (Tubulin H2-alpha) - Homo sapiens (Human)
5	1.696	0.455	1.378	TBA1_HUMAN	Tubulin alpha-1 chain (Alpha-tubulin 1) (Testis-specific alpha-tubulin) (Tubulin H2-alpha) - Homo sapiens (Human)
3	2.595	0.526	0.97	TBAK_HUMAN	Tubulin alpha-ubiquitous chain (Alpha-tubulin ubiquitous) (Tubulin K-alpha-1) - Homo sapiens (Human)
6	2.895	0.319	1.051	TBAK_HUMAN	Tubulin alpha-ubiquitous chain (Alpha-tubulin ubiquitous) (Tubulin K-alpha-1) - Homo sapiens (Human)
3	2.394	0.652	0.848	TBB1_HUMAN	Tubulin beta-1 chain - Homo sapiens (Human)
1	0.906	0.618	1.724	TBB2A_HUMAN	Tubulin beta-2A chain - Homo sapiens (Human)
2	1.029	0.651	1.469	TBB2A_HUMAN	Tubulin beta-2A chain - Homo sapiens (Human)
4	1.141	1.245	0.667	TBB2A_HUMAN	Tubulin beta-2A chain - Homo sapiens (Human)
5	1.002	0.532	1.943	TBB2C_HUMAN	Tubulin beta-2C chain (Tubulin beta-2 chain) - Homo sapiens (Human)
6	3.563	0.244	1.117	TBB5_HUMAN	Tubulin beta chain (Tubulin beta-5 chain) - Homo sapiens (Human)
1	0.67	1.663	0.867	TCEA1_HUMAN	Transcription elongation factor A protein 1 (Transcription elongation factor S-II protein 1) (Transcription elongation factor TFIIS.o) - Homo sapiens (Human)
3	0.856	0.132	11.677	TCL1A_HUMAN	T-cell leukemia/lymphoma protein 1A (P14 TCL1 protein) (TCL1 oncogene) (TCL-1 protein) - Homo sapiens (Human)
5	0.909	1.257	0.931	TCOF_HUMAN	Treacle protein (Treacher Collins syndrome protein) - Homo sapiens (Human)
6	0.525	1.134	2.196	TCOF_HUMAN	Treacle protein (Treacher Collins syndrome protein) - Homo sapiens (Human)
3	2.346	1.603	0.352	TCP4_HUMAN	Activated RNA polymerase II transcriptional coactivator p15 (SUB1 homolog) (Positive cofactor 4) (PC4) (p14) - Homo sapiens (Human)
5	1.014	0.91	1.152	TCP4_HUMAN	Activated RNA polymerase II transcriptional coactivator p15 (SUB1 homolog) (Positive cofactor 4) (PC4) (p14) - Homo sapiens (Human)
6	0.926	0.875	1.198	TCP4_HUMAN	Activated RNA polymerase II transcriptional coactivator p15 (SUB1 homolog) (Positive cofactor 4) (PC4) (p14) - Homo sapiens (Human)
5	−0.026	0.499	−82.289	TCPB_HUMAN	T-complex protein 1 subunit beta (TCP-1-beta) (CCT-beta) - Homo sapiens (Human)
6	1.14	1.123	0.758	TCPB_HUMAN	T-complex protein 1 subunit beta (TCP-1-beta) (CCT-beta) - Homo sapiens (Human)
3	0.956	1.003	1.381	TCPE_HUMAN	T-complex protein 1 subunit epsilon (TCP-1-epsilon) (CCT-epsilon) - Homo sapiens (Human)
2	0.806	1.262	0.946	TCPG_HUMAN	T-complex protein 1 subunit gamma (TCP-1-gamma) (CCT-gamma) (hTRiC5) - Homo sapiens (Human)
4	1.398	1.628	0.416	TCPG_HUMAN	T-complex protein 1 subunit gamma (TCP-1-gamma) (CCT-gamma) (hTRiC5) - Homo sapiens (Human)
5	1.023	0.886	1.173	TCPG_HUMAN	T-complex protein 1 subunit gamma (TCP-1-gamma) (CCT-gamma) (hTRiC5) - Homo sapiens (Human)
6	1.388	0.827	0.845	TCPG_HUMAN	T-complex protein 1 subunit gamma (TCP-1-gamma) (CCT-gamma) (hTRiC5) - Homo sapiens (Human)
1	1.5	0.719	0.896	TCPH_HUMAN	T-complex protein 1 subunit eta (TCP-1-eta) (CCT-eta) (HIV-1 Nef-interacting protein) - Homo sapiens (Human)
2	0.628	1.128	1.358	TCPH_HUMAN	T-complex protein 1 subunit eta (TCP-1-eta) (CCT-eta) (HIV-1 Nef-interacting protein) - Homo sapiens (Human)
5	0.723	0.609	2.415	TCPQ_HUMAN	T-complex protein 1 subunit theta (TCP-1-theta) (CCT-theta) (Renal carcinoma antigen NY-REN-15) - Homo sapiens (Human)
6	0.891	1.1	0.99	TCPQ_HUMAN	T-complex protein 1 subunit theta (TCP-1-theta) (CCT-theta) (Renal carcinoma antigen NY-REN-15) - Homo sapiens (Human)
5	0.97	1.173	0.934	TCPZ_HUMAN	T-complex protein 1 subunit zeta (TCP-1-zeta) (CCT-zeta) (CCT-zeta-1) (Tcp20) (HTR3) (Acute morphine dependence-related protein 2) - Homo sapiens (Human)
3	4.765	1.259	0.221	TEF_HUMAN	Thyrotroph embryonic factor - Homo sapiens (Human)
1	0.873	1.219	0.908	TERA_HUMAN	Transitional endoplasmic reticulum ATPase (TER ATPase) (15S Mg(2+)-ATPase p97 subunit) (Valosin-containing protein) (VCP) - Homo sapiens (Human)
2	0.909	0.919	1.152	TERA_HUMAN	Transitional endoplasmic reticulum ATPase (TER ATPase) (15S Mg(2+)-ATPase p97 subunit) (Valosin-containing protein) (VCP) - Homo sapiens (Human)
3	0.675	2.065	0.951	TERA_HUMAN	Transitional endoplasmic reticulum ATPase (TER ATPase) (15S Mg(2+)-ATPase p97 subunit) (Valosin-containing protein) (VCP) - Homo sapiens (Human)
5	0.869	1.313	0.932	TERA_HUMAN	Transitional endoplasmic reticulum ATPase (TER ATPase) (15S Mg(2+)-ATPase p97 subunit) (Valosin-containing protein) (VCP) - Homo sapiens (Human)
6	0.883	1.218	0.902	TERA_HUMAN	Transitional endoplasmic reticulum ATPase (TER ATPase) (15S Mg(2+)-ATPase p97 subunit) (Valosin-containing protein) (VCP) - Homo sapiens (Human)
5	0.915	0.417	2.786	TFG_HUMAN	Protein TFG (TRK-fused gene protein) - Homo sapiens (Human)
6	1.06	0.788	1.161	THIL_HUMAN	Acetyl-CoA acetyltransferase, mitochondrial precursor (EC 2.3.1.9) (Acetoacetyl-CoA thiolase) (T2) - Homo sapiens (Human)
2	0.957	1.347	0.747	TIF1B_HUMAN	Transcription intermediary factor 1-beta (TIF1-beta) (Tripartite motif-containing protein 28) (Nuclear corepressor KAP-1) (KRAB-associated protein 1) (KAP-1) (KRAB-interacting protein 1) (KRIP-1) (RING finger protein 96) - Homo sapiens (Human)
6	0.547	1.59	1.115	TIF1B_HUMAN	Transcription intermediary factor 1-beta (TIF1-beta) (Tripartite motif-containing protein 28) (Nuclear corepressor KAP-1) (KRAB-associated protein 1) (KAP-1) (KRAB-interacting protein 1) (KRIP-1) (RING finger protein 96) - Homo sapiens (Human)
2	0.963	0.96	1.041	TKT_HUMAN	Transketolase (EC 2.2.1.1) (TK) - Homo sapiens (Human)
5	0.828	1.042	1.232	TKT_HUMAN	Transketolase (EC 2.2.1.1) (TK) - Homo sapiens (Human)
6	1.617	0.552	0.911	TKT_HUMAN	Transketolase (EC 2.2.1.1) (TK) - Homo sapiens (Human)
1	0.881	0.325	3.374	TLN1_HUMAN	Talin-1 - Homo sapiens (Human)
2	0.761	0.266	4.743	TLN1_HUMAN	Talin-1 - Homo sapiens (Human)
3	0.901	0.28	5.437	TLN1_HUMAN	Talin-1 - Homo sapiens (Human)
5	1.096	0.377	2.571	TLN1_HUMAN	Talin-1 - Homo sapiens (Human)
6	1.207	0.384	2.238	TLN1_HUMAN	Talin-1 - Homo sapiens (Human)
5	1.217	0.966	0.904	TM109_HUMAN	Transmembrane protein 109 precursor (Mitsugumin-23) (Mg23) - Homo sapiens (Human)
1	0.749	1.558	0.829	TPIS_HUMAN	Triosephosphate isomerase (EC 5.3.1.1) (TIM) (Triose-phosphate isomerase) - Homo sapiens (Human)
2	1.206	0.849	0.921	TPIS_HUMAN	Triosephosphate isomerase (EC 5.3.1.1) (TIM) (Triose-phosphate isomerase) - Homo sapiens (Human)
3	0.379	2.604	1.342	TPIS_HUMAN	Triosephosphate isomerase (EC 5.3.1.1) (TIM) (Triose-phosphate isomerase) - Homo sapiens (Human)
4	0.74	1.997	0.641	TPIS_HUMAN	Triosephosphate isomerase (EC 5.3.1.1) (TIM) (Triose-phosphate isomerase) - Homo sapiens (Human)
5	1.06	0.678	1.481	TPIS_HUMAN	Triosephosphate isomerase (EC 5.3.1.1) (TIM) (Triose-phosphate isomerase) - Homo sapiens (Human)
6	2.859	0.507	0.669	TPIS_HUMAN	Triosephosphate isomerase (EC 5.3.1.1) (TIM) (Triose-phosphate isomerase) - Homo sapiens (Human)
1	0.806	0.807	1.485	TPM3_HUMAN	Tropomyosin alpha-3 chain (Tropomyosin-3) (Tropomyosin gamma) (hTM5) - Homo sapiens (Human)
2	0.417	0.76	3.037	TPM3_HUMAN	Tropomyosin alpha-3 chain (Tropomyosin-3) (Tropomyosin gamma) (hTM5) - Homo sapiens (Human)
3	0.935	0.932	1.52	TPM3_HUMAN	Tropomyosin alpha-3 chain (Tropomyosin-3) (Tropomyosin gamma) (hTM5) - Homo sapiens (Human)
5	0.641	0.589	2.817	TPM3_HUMAN	Tropomyosin alpha-3 chain (Tropomyosin-3) (Tropomyosin gamma) (hTM5) - Homo sapiens (Human)
1	0.957	0.527	1.917	TPM4_HUMAN	Tropomyosin alpha-4 chain (Tropomyosin-4) (TM30p1) - Homo sapiens (Human)
3	0.908	0.653	2.234	TPM4_HUMAN	Tropomyosin alpha-4 chain (Tropomyosin-4) (TM30p1) - Homo sapiens (Human)
5	0.653	0.584	2.788	TPM4_HUMAN	Tropomyosin alpha-4 chain (Tropomyosin-4) (TM30p1) - Homo sapiens (Human)
6	0.555	0.744	2.35	TPM4_HUMAN	Tropomyosin alpha-4 chain (Tropomyosin-4) (TM30p1) - Homo sapiens (Human)
2	0.966	0.713	1.396	TPP1_HUMAN	Tripeptidyl-peptidase 1 precursor (EC 3.4.14.9) (Tripeptidyl-peptidase I) (TPP-1) (TPP-I) (Tripeptidyl aminopeptidase) (Lysosomal pepstatin insensitive protease) (LPIC) (Cell growth-inhibiting gene 1 protein) - Homo sapiens (Human)
5	1.194	0.747	1.192	TPP1_HUMAN	Tripeptidyl-peptidase 1 precursor (EC 3.4.14.9) (Tripeptidyl-peptidase I) (TPP-1) (TPP-I) (Tripeptidyl aminopeptidase) (Lysosomal pepstatin insensitive protease) (LPIC) (Cell growth-inhibiting gene 1 protein) - Homo sapiens (Human)
6	1.402	1.014	0.682	TPP1_HUMAN	Tripeptidyl-peptidase 1 precursor (EC 3.4.14.9) (Tripeptidyl-peptidase I) (TPP-1) (TPP-I) (Tripeptidyl aminopeptidase) (Lysosomal pepstatin insensitive protease) (LPIC) (Cell growth-inhibiting gene 1 protein) - Homo sapiens (Human)
5	1.074	0.729	1.358	TPSN_HUMAN	Tapasin precursor (TPSN) (TPN) (TAP-binding protein) (TAP-associated protein) (NGS-17) - Homo sapiens (Human)
6	0.297	2.656	1.231	TRA2A_HUMAN	Transformer-2 protein homolog (TRA-2 alpha) - Homo sapiens (Human)
6	0.123	9.201	0.861	TRFE_HUMAN	Serotransferrin precursor (Transferrin) (Siderophilin) (Beta-1-metal-binding globulin) - Homo sapiens (Human)
2	0.673	2.191	0.652	TRFL_HUMAN	Lactotransferrin precursor (EC 3.4.21.-) (Lactoferrin) (Talalactoferrin alfa) [Contains: Kaliocin-1; Lactoferroxin A; Lactoferroxin B; Lactoferroxin C] - Homo sapiens (Human)
5	0.878	4.249	0.285	TRFL_HUMAN	Lactotransferrin precursor (EC 3.4.21.-) (Lactoferrin) (Talalactoferrin alfa) [Contains: Kaliocin-1; Lactoferroxin A; Lactoferroxin B; Lactoferroxin C] - Homo sapiens (Human)
6	0.29	12.811	0.261	TRFL_HUMAN	Lactotransferrin precursor (EC 3.4.21.-) (Lactoferrin) (Talalactoferrin alfa) [Contains: Kaliocin-1; Lactoferroxin A; Lactoferroxin B; Lactoferroxin C] - Homo sapiens (Human)
2	2.503	0.65	0.592	TXND5_HUMAN	Thioredoxin domain-containing protein 5 precursor (Thioredoxin-like protein p46) (Endoplasmic reticulum protein ERp46) - Homo sapiens (Human)
3	2.598	3.178	0.16	TXND5_HUMAN	Thioredoxin domain-containing protein 5 precursor (Thioredoxin-like protein p46) (Endoplasmic reticulum protein ERp46) - Homo sapiens (Human)
4	0.137	−8.125	−0.85	TXND5_HUMAN	Thioredoxin domain-containing protein 5 precursor (Thioredoxin-like protein p46) (Endoplasmic reticulum protein ERp46) - Homo sapiens (Human)
6	5.451	0.561	0.317	TXND5_HUMAN	Thioredoxin domain-containing protein 5 precursor (Thioredoxin-like protein p46) (Endoplasmic reticulum protein ERp46) - Homo sapiens (Human)
1	0.537	1.705	1.055	TYB10_HUMAN	Thymosin beta-10 - Homo sapiens (Human)
2	−0.136	0.842	−8.424	TYB10_HUMAN	Thymosin beta-10 - Homo sapiens (Human)
5	2.352	0.189	2.395	TYB10_HUMAN	Thymosin beta-10 - Homo sapiens (Human)
6	0.703	0.322	4.289	TYB10_HUMAN	Thymosin beta-10 - Homo sapiens (Human)
1	0.581	0.724	2.297	TYB4_HUMAN	Thymosin beta-4 (T beta 4) (Fx) [Contains: Hematopoietic system regulatory peptide (Seraspenide)] - Homo sapiens (Human)
2	0.926	0.414	2.519	TYB4_HUMAN	Thymosin beta-4 (T beta 4) (Fx) [Contains: Hematopoietic system regulatory peptide (Seraspenide)] - Homo sapiens (Human)
5	2.345	0.197	3.463	TYB4_HUMAN	Thymosin beta-4 (T beta 4) (Fx) [Contains: Hematopoietic system regulatory peptide (Seraspenide)] - Homo sapiens (Human)
6	3.362	0.207	1.394	TYB4_HUMAN	Thymosin beta-4 (T beta 4) (Fx) [Contains: Hematopoietic system regulatory peptide (Seraspenide)] - Homo sapiens (Human)
3	5.376	0.221	1.113	U2AF1_HUMAN	Splicing factor U2AF 35 kDa subunit (U2 auxiliary factor 35 kDa subunit) (U2 snRNP auxiliary factor small subunit) - Homo sapiens (Human)
5	0.753	1.15	1.29	U5S1_HUMAN	116 kDa U5 small nuclear ribonucleoprotein component (U5 snRNP-specific protein, 116 kDa) (U5-116 kDa) (Elongation factor Tu GTP-binding domain protein 2) (hSNU114) - Homo sapiens (Human)
5	0.577	1.568	1.176	UBE1_HUMAN	Ubiquitin-activating enzyme E1 (A1S9 protein) - Homo sapiens (Human)
6	0.525	0.954	1.937	UBE1_HUMAN	Ubiquitin-activating enzyme E1 (A1S9 protein) - Homo sapiens (Human)
1	1.921	1.148	0.438	UBE2N_HUMAN	Ubiquitin-conjugating enzyme E2 N (EC 6.3.2.19) (Ubiquitin-protein ligase N) (Ubiquitin carrier protein N) (Ubc13) (Bendless-like ubiquitin-conjugating enzyme) - Homo sapiens (Human)
3	0.653	1.73	1.173	UBE2N_HUMAN	Ubiquitin-conjugating enzyme E2 N (EC 6.3.2.19) (Ubiquitin-protein ligase N) (Ubiquitin carrier protein N) (Ubc13) (Bendless-like ubiquitin-conjugating enzyme) - Homo sapiens (Human)
5	1.226	0.74	1.172	UBE2N_HUMAN	Ubiquitin-conjugating enzyme E2 N (EC 6.3.2.19) (Ubiquitin-protein ligase N) (Ubiquitin carrier protein N) (Ubc13) (Bendless-like ubiquitin-conjugating enzyme) - Homo sapiens (Human)
6	1	0.506	1.917	UBE2N_HUMAN	Ubiquitin-conjugating enzyme E2 N (EC 6.3.2.19) (Ubiquitin-protein ligase N) (Ubiquitin carrier protein N) (Ubc13) (Bendless-like ubiquitin-conjugating enzyme) - Homo sapiens (Human)
1	1.454	1.109	0.599	UBIQ_HUMAN	Ubiquitin - Homo sapiens (Human)
2	1.374	1.415	0.577	UBIQ_HUMAN	Ubiquitin - Homo sapiens (Human)
3	2.945	0.978	0.46	UBIQ_HUMAN	Ubiquitin - Homo sapiens (Human)
4	0.919	2.005	0.514	UBIQ_HUMAN	Ubiquitin - Homo sapiens (Human)
5	0.894	1.995	0.596	UBIQ_HUMAN	Ubiquitin - Homo sapiens (Human)
6	0.376	1.708	1.51	UBIQ_HUMAN	Ubiquitin - Homo sapiens (Human)
2	0.868	1.052	1.053	UQCR2_HUMAN	Ubiquinol-cytochrome-c reductase complex core protein 2, mitochondrial precursor (EC 1.10.2.2) (Core protein II) (Complex III subunit II) - Homo sapiens (Human)
5	1.801	0.985	0.6	UQCR2_HUMAN	Ubiquinol-cytochrome-c reductase complex core protein 2, mitochondrial precursor (EC 1.10.2.2) (Core protein II) (Complex III subunit II) - Homo sapiens (Human)
6	0.495	1.016	1.931	UQCR2_HUMAN	Ubiquinol-cytochrome-c reductase complex core protein 2, mitochondrial precursor (EC 1.10.2.2) (Core protein II) (Complex III subunit II) - Homo sapiens (Human)
5	1.982	0.197	2.72	URP2_HUMAN	Unc-112-related protein 2 (Kindlin-3) (MIG2-like) - Homo sapiens (Human)
3	1.702	0.609	1.278	UTS2_HUMAN	Urotensin-2 precursor (Urotensin-II) (U-II) (UII) - Homo sapiens (Human)
6	0.613	0.769	2.061	VAPA_HUMAN	Vesicle-associated membrane protein-associated protein A (VAMP-associated protein A) (VAMP-A) (VAP-A) (33 kDa Vamp-associated protein) (VAP-33) - Homo sapiens (Human)
2	−0.089	1.661	−6.517	VAT1_HUMAN	Synaptic vesicle membrane protein VAT-1 homolog (EC 1.-.-.-) - Homo sapiens (Human)
2	1.227	0.649	1.208	VATB2_HUMAN	Vacuolar ATP synthase subunit B, brain isoform (EC 3.6.3.14) (V-ATPase B2 subunit) (Vacuolar proton pump B isoform 2) (Endomembrane proton pump 58 kDa subunit) (HO57) - Homo sapiens (Human)
2	1.014	1.332	0.712	VDAC1_HUMAN	Voltage-dependent anion-selective channel protein 1 (VDAC-1) (hVDAC1) (Outer mitochondrial membrane protein porin 1) (Plasmalemmal porin) (Porin 31HL) (Porin 31HM) - Homo sapiens (Human)
2	0.919	1.508	0.694	VDAC2_HUMAN	Voltage-dependent anion-selective channel protein 2 (VDAC-2) (hVDAC2) (Outer mitochondrial membrane protein porin 2) - Homo sapiens (Human)
1	0.851	1.302	0.871	VIME_HUMAN	Vimentin - Homo sapiens (Human)
2	1.12	0.842	1.048	VIME_HUMAN	Vimentin - Homo sapiens (Human)
3	1.879	1.224	0.576	VIME_HUMAN	Vimentin - Homo sapiens (Human)
4	1.082	1.418	0.786	VIME_HUMAN	Vimentin - Homo sapiens (Human)
5	1.077	1.263	0.781	VIME_HUMAN	Vimentin - Homo sapiens (Human)
6	1.017	1.022	0.828	VIME_HUMAN	Vimentin - Homo sapiens (Human)
1	1.712	0.327	1.727	VINC_HUMAN	Vinculin (Metavinculin) - Homo sapiens (Human)
5	2.911	0.436	0.837	VINC_HUMAN	Vinculin (Metavinculin) - Homo sapiens (Human)
6	−0.055	4.822	−3.653	VTDB_HUMAN	Vitamin D-binding protein precursor (DBP) (Group-specific component) (Gc-globulin) (VDB) - Homo sapiens (Human)
5	0.914	0.616	1.888	WASP_HUMAN	Wiskott-Aldrich syndrome protein (WASp) - Homo sapiens (Human)
6	0.332	2.071	1.41	ZRAB2_HUMAN	Zinc finger Ran-binding domain-containing protein 2 (Zinc finger protein 265) (Zinc finger, splicing) - Homo sapiens (Human)
5	0.598	0.16	11.154	ZYX_HUMAN	Zyxin (Zyxin-2) - Homo sapiens (Human)

## Sheet: Table S1b
Table S1b. Overview of all the up and downregulated proteins.
Left: Table 1B Left
Proteins recurring in at least three out of six different runs were withheld by an automated Excel Macro for: T-test (array1: LOG of the protein ratios - array2: corresponding # of zeros, type: 2-tailed, homoscedastic))
The given p-value of the t-test determine if a protein log ratio is significantly different from zero and thus up or down regulated in one of the two sample groups.
Bold numbers: Signifantly aberrant ratios of the H/pool were not withheld because the pooled sample was only applied for inter-run comparison and to increase the number of identifications.
Right: Table 1B Right
Uniprot ID and protein names of the proteins up-and down regulated in [CLL (UM+ and M-) / Healthy]
Uniprot ID and protein names of the proteins up-and down regulated (cfr. Table 1) for the M-/UM+ ratios.
#	protein acc	protein name	p-value U/M	p-value M/H	p-value H/U	p-value H/pool		Proteins upregulated in [CLL (UM+ and M-) / Healthy]		Proteins downregulated in [CLL (UM+ and M-) / Healthy]			Proteins upregulated in UM+/M-		Proteins downregulated in UM+/M-
4	ACADM_HUMAN	Medium-chain specific acyl-CoA dehydrogenase, mitochondrial precursor	-	-	0.013385			ACADM_HUMAN	Medium-chain specific acyl-CoA dehydrogenase,...	ACTB_HUMAN	Actin, cytoplasmic 1		ATPB_HUMAN	ATP synthase subunit beta, mitochondrial	BCLF1_HUMAN	Bcl-2-associated transcription factor 1
6	ACTB_HUMAN	Actin, cytoplasmic 1 (Beta-actin)	-	0.0413721	0.0173881	0.0108941		AHNK_HUMAN	Neuroblast differentiation-associated protein...	ACTG_HUMAN	Actin, cytoplasmic 2		ENPL_HUMAN	Endoplasmin	EZRI_HUMAN	Ezrin
4	ACTG_HUMAN	Actin, cytoplasmic 2	-	0.0309908	0.00979109	0.000735975		ANXA5_HUMAN	Annexin A5	ACTN4_HUMAN	Alpha-actinin-4		H2B1C_HUMAN	Histone H2B type 1-C/E/F/G/I	HNRPK_HUMAN	Heterogeneous nuclear ribonucleoprotein K
4	ACTN4_HUMAN	Alpha-actinin-4	-	0.00990989	-			ATIF1_HUMAN	ATPase inhibitor, mitochondrial	ARPC5_HUMAN	Actin-related protein 2/3 complex subunit 5		H2B1D_HUMAN	Histone H2B type 1-D	HNRPU_HUMAN	Heterogeneous nuclear ribonucleoprotein U
5	AHNK_HUMAN	Neuroblast differentiation-associated protein AHNAK	-	-	0.0186184	0.000636143		BCLF1_HUMAN	Bcl-2-associated transcription factor 1	CLIC1_HUMAN	Chloride intracellular channel protein 1		H2B1O_HUMAN	Histone H2B type 1-O	HSP7C_HUMAN	Heat shock cognate 71 kDa protein
	ALBU_HUMAN	Serum albumin				0.000848577		CH10_HUMAN	10 kDa heat shock protein, mitochondrial	COF1_HUMAN	Cofilin-1		PHB_HUMAN	Prohibitin	ILF3_HUMAN	Interleukin enhancer-binding factor 3
5	ANXA5_HUMAN	Annexin A5	-	0.0259499	0.00965287	0.00109223		DHX9_HUMAN	ATP-dependent RNA helicase A	CXCL7_HUMAN	Platelet basic protein		RS13_HUMAN	40S ribosomal protein S13	MATR3_HUMAN	Matrin-3
5	ARPC5_HUMAN	Actin-related protein 2/3 complex subunit 5	-	-	0.0433651			EF2_HUMAN	Elongation factor 2	EHD1_HUMAN	EH domain-containing protein 1		RS14_HUMAN	40S ribosomal protein S14	RL8_HUMAN	60S ribosomal protein L8
3	ATIF1_HUMAN	ATPase inhibitor, mitochondrial precursor	-	0.0313213	-			EZRI_HUMAN	Ezrin	ENPL_HUMAN	Endoplasmin				ROA1_HUMAN	Heterogeneous nuclear ribonucleoprotein A1
	ATPA_HUMAN	ATP synthase subunit alpha, mitochondrial						FETUA_HUMAN	Alpha-2-HS-glycoprotein	FLNA_HUMAN	Filamin-A				RS21_HUMAN	40S ribosomal protein S21
3	ATPB_HUMAN	ATP synthase subunit beta, mitochondrial precursor	0.0192848	-	-			FUBP1_HUMAN	Far upstream element-binding protein 1	GRP78_HUMAN	78 kDa glucose-regulated protein				RS28_HUMAN	40S ribosomal protein S28
3	BCLF1_HUMAN	Bcl-2-associated transcription factor 1	0.0383752	0.0234656	-	0.00769925		FUBP2_HUMAN	Far upstream element-binding protein 2	H2B1C_HUMAN	Histone H2B type 1-C/E/F/G/I				S10A6_HUMAN	Protein S100-A6
	CALR_HUMAN	Calreticulin				0.0357174		GANAB_HUMAN	Neutral alpha-glucosidase AB	HBA_HUMAN	Hemoglobin subunit alpha				SRSF1_HUMAN	Serine/arginine-rich splicing factor 1
4	CH10_HUMAN	10 kDa heat shock protein, mitochondrial (Hsp10)	-	0.0493601	-			HNRPC_HUMAN	Heterogeneous nuclear ribonucleoproteins C1/C...	HBB_HUMAN	Hemoglobin subunit beta				SRSF3_HUMAN	Serine/arginine-rich splicing factor 3
4	CLIC1_HUMAN	Chloride intracellular channel protein 1	-	0.0369032	0.026933			HNRPD_HUMAN	Heterogeneous nuclear ribonucleoprotein D0	LDHB_HUMAN	L-lactate dehydrogenase B chain				SRSF7_HUMAN	Serine/arginine-rich splicing factor 7
5	COF1_HUMAN	Cofilin-1	-	-	0.0169808			HNRPK_HUMAN	Heterogeneous nuclear ribonucleoprotein K	MARE1_HUMAN	Microtubule-associated protein RP/EB family m...				STIP1_HUMAN	Stress-induced-phosphoprotein 1
4	DHX9_HUMAN	ATP-dependent RNA helicase A	-	0.00843748	-	0.0159428		HNRPL_HUMAN	Heterogeneous nuclear ribonucleoprotein L	MYH9_HUMAN	Myosin-9				TERA_HUMAN	Transitional endoplasmic reticulum ATPase
6	EF2_HUMAN	Elongation factor 2	-	0.0417452	-	0.00659108		HNRPM_HUMAN	Heterogeneous nuclear ribonucleoprotein M	PDIA3_HUMAN	Protein disulfide-isomerase A3				TPM3_HUMAN	Tropomyosin alpha-3 chain
3	EHD1_HUMAN	EH domain-containing protein 1	-	0.0518613	0.0200628			HNRPU_HUMAN	Heterogeneous nuclear ribonucleoprotein U	PGM2_HUMAN	Phosphoglucomutase-2				TPM4_HUMAN	Tropomyosin alpha-4 chain
	ELAV1_HUMAN	ELAV-like protein 1				3.77937e-05		ILF3_HUMAN	Interleukin enhancer-binding factor 3	PRDX5_HUMAN	Peroxiredoxin-5, mitochondrial				TRFL_HUMAN	Lactotransferrin
4	ENPL_HUMAN	Endoplasmin precursor (Grp94; gp96)	0.0205142	0.0294785	-	0.000254752		LSP1_HUMAN	Lymphocyte-specific protein 1	PROF1_HUMAN	Profilin-1
4	EZRI_HUMAN	Ezrin	0.0331691	0.0300874	-	0.00128812		MATR3_HUMAN	Matrin-3	TAGL2_HUMAN	Transgelin-2
4	FETUA_HUMAN	Alpha-2-HS-glycoprotein precursor	-	0.00376033	0.00633277	0.00031217		MOES_HUMAN	Moesin	TLN1_HUMAN	Talin-1
6	FLNA_HUMAN	Filamin-A	-	0.0208679	0.0246571	0.0396945		NPM_HUMAN	Nucleophosmin	TPM3_HUMAN	Tropomyosin alpha-3 chain
4	FUBP1_HUMAN	Far upstream element-binding protein 1	-	0.0127744	-	0.00980998		NUCL_HUMAN	Nucleolin	TPM4_HUMAN	Tropomyosin alpha-4 chain
3	FUBP2_HUMAN	Far upstream element-binding protein 2	-	0.0157888	-	0.0293001		PEBP1_HUMAN	Phosphatidylethanolamine-binding protein 1	TYB10_HUMAN	Thymosin beta-10
	FUSIP_HUMAN	FUS-interacting serine-arginine-rich protein 1				0.00914532		PHB_HUMAN	Prohibitin	TYB4_HUMAN	Thymosin beta-4
	G3P_HUMAN	Glyceraldehyde-3-phosphate dehydrogenase				0.00319576		RBM8A_HUMAN	RNA-binding protein 8A
3	GANAB_HUMAN	Neutral alpha-glucosidase AB precursor	-	-	0.0416123			RL8_HUMAN	60S ribosomal protein L8
3	GRP78_HUMAN	78 kDa glucose-regulated protein precursor	-	0.000425152	-			ROA1_HUMAN	Heterogeneous nuclear ribonucleoprotein A1
	H2A1B_HUMAN	Histone H2A type 1-B				0.0259566		ROA2_HUMAN	Heterogeneous nuclear ribonucleoproteins A2/B...
3	H2B1C_HUMAN	Histone H2B type 1-C/E/F/G/I	0.0124433	0.0295637	-			RS13_HUMAN	40S ribosomal protein S13
3	H2B1D_HUMAN	Histone H2B type 1-D	0.0183976	-	-			RS14_HUMAN	40S ribosomal protein S14
3	H2B1O_HUMAN	Histone H2B type 1-O	0.0297351	-	-			RS21_HUMAN	40S ribosomal protein S21
6	HBA_HUMAN	Hemoglobin subunit alpha	-	2.81599e-07	4.45501e-06	2.71153e-06		RS28_HUMAN	40S ribosomal protein S28
6	HBB_HUMAN	Hemoglobin subunit beta	-	6.18801e-06	4.38806e-06	1.26949e-05		S10A4_HUMAN	Protein S100-A4
	HMGN1_HUMAN	Non-histone chromosomal protein HMG-14				0.0159715		S10A6_HUMAN	Protein S100-A6
	HMGN2_HUMAN	Non-histone chromosomal protein HMG-17		0.0288234				SFPQ_HUMAN	Splicing factor, proline- and glutamine-rich
5	HNRPC_HUMAN	Heterogeneous nuclear ribonucleoproteins C1/C2	-	0.0139736	0.0429728	0.00623277		SRP14_HUMAN	Signal recognition particle 14 kDa protein
4	HNRPD_HUMAN	Heterogeneous nuclear ribonucleoprotein D0	-	0.000166012	0.00247375	0.000109415		TRFL_HUMAN	Lactotransferrin
5	HNRPG_HUMAN	Heterogeneous nuclear ribonucleoprotein G	-	0.000857631	-	0.0324083		TXND5_HUMAN	Thioredoxin domain-containing protein 5
6	HNRPK_HUMAN	Heterogeneous nuclear ribonucleoprotein K	0.001376	0.0129502	0.0267857			VIME_HUMAN	Vimentin
4	HNRPL_HUMAN	Heterogeneous nuclear ribonucleoprotein L	-	0.00122107	-	0.0076437
5	HNRPM_HUMAN	Heterogeneous nuclear ribonucleoprotein M	-	0.0273895	-	0.00453803
4	HNRPU_HUMAN	Heterogeneous nuclear ribonucleoprotein U	0.044781	4.86883e-05	0.0117813	0.00520528
5	HSP7C_HUMAN	Heat shock cognate 71 kDa protein	0.01438	-	-
3	ILF3_HUMAN	Interleukin enhancer-binding factor 3	0.00580818	0.010324	0.00775036	0.000584933
	KAD2_HUMAN	Adenylate kinase isoenzyme 2, mitochondrial				0.0143062
4	KU70_HUMAN	ATP-dependent DNA helicase 2 subunit 1	-	0.00490945	-	0.0245338
	KU86_HUMAN	ATP-dependent DNA helicase 2 subunit 2				0.00639104
3	LDHB_HUMAN	L-lactate dehydrogenase B chain	-	-	0.0369108	0.00867559
3	LSP1_HUMAN	Lymphocyte-specific protein 1	-	0.000925542	-
3	MARE1_HUMAN	Microtubule-associated protein RP/EB family member 1	-	0.0407641	-
3	MATR3_HUMAN	Matrin-3	0.0185058	0.003242	0.00676587	0.0101002
	MIF_HUMAN	Macrophage migration inhibitory factor				0.000395904
6	MOES_HUMAN	Moesin (Membrane-organizing extension spike protein)	-	0.0260756	-	0.00252151
4	MYH9_HUMAN	Myosin-9	-	0.000304178	-	0.0417923
5	NPM_HUMAN	Nucleophosmin	-	0.00344498	0.00224791	0.0146738
6	NUCL_HUMAN	Nucleolin	-	0.00189198	0.0251179	0.00111782
	PAK2_HUMAN	Serine/threonine-protein kinase PAK 2				0.000139642
	PARK7_HUMAN	Protein DJ-1				0.00129715
5	PDIA3_HUMAN	Protein disulfide-isomerase A3 precursor	-	0.0356474	-
6	PEBP1_HUMAN	Phosphatidylethanolamine-binding protein 1	-	-	0.00426611	3.45753e-05
3	PGM2_HUMAN	Phosphoglucomutase-2	-	0.0268374	-
4	PHB_HUMAN	Prohibitin	0.0371941	-	0.00501485	0.0134535
	PPIA_HUMAN	Peptidyl-prolyl cis-trans isomerase A				0.0202865
3	PRDX5_HUMAN	Peroxiredoxin-5, mitochondrial precursor	-	0.0112334	-
6	PROF1_HUMAN	Profilin-1	-	0.00424646	-	0.041188
	PTMA_HUMAN	Prothymosin alpha				0.0346668
	RAC2_HUMAN	Ras-related C3 botulinum toxin substrate 2				0.00456053
	RALY_HUMAN	RNA-binding protein Raly				0.000503312
3	RBM8A_HUMAN	RNA-binding protein 8A	-	-	0.000228609
	RBM25_HUMAN	Probable RNA-binding protein 25				0.00240819
	RD23B_HUMAN	UV excision repair protein RAD23 homolog B				0.000138301
4	RL8_HUMAN	60S ribosomal protein L8	-	0.0134657	-	0.0178695
5	ROA1_HUMAN	Heterogeneous nuclear ribonucleoprotein A1	0.0114523	0.0334066	-	7.82921e-06
6	ROA2_HUMAN	Heterogeneous nuclear ribonucleoproteins A2/B1	-	0.0142501	-	3.08611e-06
	ROA3_HUMAN	Heterogeneous nuclear ribonucleoprotein A3				0.0387412
5	RS13_HUMAN	40S ribosomal protein S13	0.0480662	-	0.00764557
6	RS14_HUMAN	40S ribosomal protein S14	-	-	0.0257366	0.00678548
3	RS21_HUMAN	40S ribosomal protein S21	0.0364002	0.00282283	-	0.0458826
4	RS28_HUMAN	40S ribosomal protein S28	0.014672	0.0225211	-
5	S10A4_HUMAN	Protein S100-A4 (S100 calcium-binding protein A4)	-	0.0539396	0.00136983	0.0181656
5	S10A6_HUMAN	Protein S100-A6 (S100 calcium-binding protein A6)	0.0223539	7.91036e-06	-	0.0167104
5	CXCL7_HUMAN	Platelet basic protein precursor (PBP)	-	0.000488413	0.000218968	0.0138698
4	SFPQ_HUMAN	Splicing factor, proline- and glutamine-rich	-	0.00190297	6.30742e-06	0.00669391
4	SFRS1_HUMAN	Splicing factor, arginine/serine-rich 1	0.000276918	0.000258302	0.000133252	0.000146278
5	SFRS3_HUMAN	Splicing factor, arginine/serine-rich 3	0.0130009	0.0012003	0.00896339	1.33806e-06
3	SFRS7_HUMAN	Splicing factor, arginine/serine-rich 7	0.0270477	-	-
	SH3L3_HUMAN	SH3 domain-binding glutamic acid-rich-like protein 3				0.014987
4	SRP14_HUMAN	Signal recognition particle 14 kDa protein	-	0.0370695	-	0.00889946
3	STIP1_HUMAN	Stress-induced-phosphoprotein 1	0.0467664	-	-
	TALDO_HUMAN	Transaldolase				0.0476445
4	TAGL2_HUMAN	Transgelin-2	-	0.00128505	0.0505659
3	TBA1_HUMAN	Tubulin alpha-1 chain	-	0.0347728	0.00828817	0.0427328
5	TERA_HUMAN	Transitional endoplasmic reticulum ATPase	0.0113478	-	-
5	TLN1_HUMAN	Talin-1	-	3.63633e-07	8.5092e-05	0.000835537
	TPIS_HUMAN	Triosephosphate isomerase				2.14091e-07
4	TPM3_HUMAN	Tropomyosin alpha-3 chain	-	0.0295534	0.00860589	0.00113849
4	TPM4_HUMAN	Tropomyosin alpha-4 chain	-	0.000679165	3.73212e-05	0.039
3	TRFL_HUMAN	Lactotransferrin precursor	0.0508397	0.0364204	0.0258397	0.0175525
4	TXND5_HUMAN	Thioredoxin domain-containing protein 5 precursor	-	-	0.0465699	0.00463744
4	TYB10_HUMAN	Thymosin beta-10	-	-	0.0429453	0.00373697
4	TYB4_HUMAN	Thymosin beta-4	-	0.0120202	0.00449162
	UBE2N_HUMAN	Ubiquitin-conjugating enzyme E2 N				0.01826
6	UBIQ_HUMAN	Ubiquitin	-	0.0100374	0.0318338	0.0144393
6	VIME_HUMAN	Vimentin	-	-	0.0200237	0.0040666

## Sheet: Table S1c
Table S1c. GO analysis of the proteins upregulated in [CLL (UM+ and M-) / Healthy] and downregulated in [CLL (UM+ and M−) / Healthy].
Cellular component categories of the GO analysis of WebGestalt [22].
	Upregulated in [CLL (UM+ and M-) / Healthy]						Downregulated in [CLL (UM+ and M-) / Healthy]
														RELATIVE COMPARISON
Functional Clustering of the GO analysis of DAVID
Categories of the different Annotation Clusters
Functional annotation clustering GO analysis by DAVID.
information for data interpretation:		http://david.abcc.ncifcrf.gov/helps/functional_annotation.html
options of the DAVID analysis: Below
	Upregulated in [CLL (UM+ and M-) / Healthy]														Downregulated in [CLL (UM+ and M-) / Healthy]
Annotation Cluster 1	Enrichment Score: 7.953567389567502													Annotation Cluster 1	Enrichment Score: 6.041133053615074
Category	Term	Count	%	PValue	Genes	List Total	Pop Hits	Pop Total	Fold Enrichment	Bonferroni	Benjamini	FDR		Category	Term	Count	%	p-Value	Genes	List Total	Pop Hits	Pop Total	Fold Enrichment	Bonferroni	Benjamini	FDR
GOTERM_CC_FAT	GO:0030529~ribonucleoprotein complex	21	48.8372	1.46197e-18	RBM8A_HUMAN, NPM_HUMAN, SRP14_HUMAN, ILF3_HUMAN, RS21_HUMAN, DHX9_HUMAN, HNRPM_HUMAN, HNRPK_HUMAN, RS14_HUMAN, RL8_HUMAN, HNRPU_HUMAN, HNRPL_HUMAN, EF2_HUMAN, ROA2_HUMAN, NUCL_HUMAN, ROA1_HUMAN, RS28_HUMAN, HNRPD_HUMAN, HNRPC_HUMAN, RS13_HUMAN	39	515	12782	13.3643	1.76898e-16	1.76898e-16	1.68076e-15		SP_PIR_KEYWORDS	actin-binding	10	37.037	2.11999e-11	ARPC5_HUMAN, ACTN4_HUMAN, MYH9_HUMAN, COF1_HUMAN, TYB4_HUMAN, PROF1_HUMAN, TPM3_HUMAN, TPM4_HUMAN, TYB10_HUMAN, FLNA_HUMAN	27	247	19235	28.8424	2.39559e-09	1.1978e-09	2.4071e-08
SP_PIR_KEYWORDS	rna-binding	18	41.8605	4.16769e-16	RBM8A_HUMAN, MATR3_HUMAN, NPM_HUMAN, SRP14_HUMAN, ILF3_HUMAN, DHX9_HUMAN, HNRPM_HUMAN, HNRPK_HUMAN, RL8_HUMAN, HNRPU_HUMAN, HNRPL_HUMAN, SFPQ_HUMAN, ROA2_HUMAN, NUCL_HUMAN, ROA1_HUMAN, FUBP2_HUMAN, HNRPD_HUMAN, HNRPC_HUMAN	43	540	19235	14.9109	5.72875e-14	2.86438e-14	5.21805e-13		GOTERM_MF_FAT	GO:0003779~actin binding	11	40.7407	2.03247e-10	ARPC5_HUMAN, ACTN4_HUMAN, MYH9_HUMAN, COF1_HUMAN, TYB4_HUMAN, PROF1_HUMAN, TPM3_HUMAN, TLN1_HUMAN, TPM4_HUMAN, TYB10_HUMAN, FLNA_HUMAN	26	326	12983	16.8491	2.68286e-08	2.68286e-08	2.37334e-07
SP_PIR_KEYWORDS	ribonucleoprotein	15	34.8837	4.71433e-16	SRP14_HUMAN, RS21_HUMAN, HNRPM_HUMAN, HNRPK_HUMAN, RL8_HUMAN, RS14_HUMAN, HNRPL_HUMAN, HNRPU_HUMAN, ROA2_HUMAN, ROA1_HUMAN, RS28_HUMAN, HNRPD_HUMAN, HNRPC_HUMAN, RS13_HUMAN	43	279	19235	24.0498	5.72875e-14	1.90958e-14	5.21805e-13		GOTERM_BP_FAT	GO:0030036~actin cytoskeleton organization	10	37.037	2.11052e-10	ARPC5_HUMAN, ACTN4_HUMAN, MYH9_HUMAN, COF1_HUMAN, TYB4_HUMAN, PROF1_HUMAN, TLN1_HUMAN, TYB10_HUMAN, FLNA_HUMAN, ACTG_HUMAN	27	226	13528	22.1698	9.34961e-08	9.34961e-08	2.98748e-07
GOTERM_MF_FAT	GO:0003723~RNA binding	21	48.8372	2.64406e-15	RBM8A_HUMAN, MATR3_HUMAN, NPM_HUMAN, SRP14_HUMAN, ILF3_HUMAN, DHX9_HUMAN, HNRPM_HUMAN, HNRPK_HUMAN, RS14_HUMAN, RL8_HUMAN, HNRPU_HUMAN, HNRPL_HUMAN, SFPQ_HUMAN, ROA2_HUMAN, NUCL_HUMAN, ROA1_HUMAN, FUBP1_HUMAN, FUBP2_HUMAN, HNRPD_HUMAN, HNRPC_HUMAN, RS13_HUMAN	41	718	12983	9.2616	3.33067e-13	3.33067e-13	3.08642e-12		SP_PIR_KEYWORDS	cytoskeleton	12	44.4444	2.3313e-10	ARPC5_HUMAN, COF1_HUMAN, TYB4_HUMAN, PROF1_HUMAN, ACTB_HUMAN, TPM3_HUMAN, MARE1_HUMAN, TLN1_HUMAN, TPM4_HUMAN, TYB10_HUMAN, FLNA_HUMAN, ACTG_HUMAN	27	636	19235	13.4416	2.63437e-08	8.78124e-09	2.64703e-07
GOTERM_BP_FAT	GO:0008380~RNA splicing	12	27.907	2.8628e-10	RBM8A_HUMAN, SFPQ_HUMAN, HNRPU_HUMAN, HNRPL_HUMAN, ROA2_HUMAN, ROA1_HUMAN, DHX9_HUMAN, HNRPM_HUMAN, FUBP2_HUMAN, HNRPK_HUMAN, HNRPD_HUMAN, HNRPC_HUMAN	40	284	13528	14.2901	1.36269e-07	1.36269e-07	4.09402e-07		GOTERM_BP_FAT	GO:0030029~actin filament-based process	10	37.037	3.7369e-10	ARPC5_HUMAN, ACTN4_HUMAN, MYH9_HUMAN, COF1_HUMAN, TYB4_HUMAN, PROF1_HUMAN, TLN1_HUMAN, TYB10_HUMAN, FLNA_HUMAN, ACTG_HUMAN	27	241	13528	20.7899	1.65544e-07	8.27723e-08	5.28965e-07
GOTERM_BP_FAT	GO:0000375~RNA splicing, via transesterification reactions	10	23.2558	3.79193e-10	RBM8A_HUMAN, HNRPU_HUMAN, HNRPL_HUMAN, ROA2_HUMAN, ROA1_HUMAN, DHX9_HUMAN, HNRPM_HUMAN, HNRPK_HUMAN, HNRPD_HUMAN, HNRPC_HUMAN	40	153	13528	22.1046	1.80496e-07	9.02479e-08	5.42276e-07		GOTERM_MF_FAT	GO:0008092~cytoskeletal protein binding	12	44.4444	7.37015e-10	ARPC5_HUMAN, ACTN4_HUMAN, MYH9_HUMAN, COF1_HUMAN, TYB4_HUMAN, PROF1_HUMAN, TPM3_HUMAN, MARE1_HUMAN, TLN1_HUMAN, TPM4_HUMAN, TYB10_HUMAN, FLNA_HUMAN	26	504	12983	11.8892	9.7286e-08	4.8643e-08	8.60623e-07
GOTERM_BP_FAT	GO:0000377~RNA splicing, via transesterification reactions with bulged adenosine as nucleophile	10	23.2558	3.79193e-10	RBM8A_HUMAN, HNRPU_HUMAN, HNRPL_HUMAN, ROA2_HUMAN, ROA1_HUMAN, DHX9_HUMAN, HNRPM_HUMAN, HNRPK_HUMAN, HNRPD_HUMAN, HNRPC_HUMAN	40	153	13528	22.1046	1.80496e-07	9.02479e-08	5.42276e-07		GOTERM_CC_FAT	GO:0015629~actin cytoskeleton	9	33.3333	2.75082e-08	ARPC5_HUMAN, ACTN4_HUMAN, MYH9_HUMAN, COF1_HUMAN, PROF1_HUMAN, TPM3_HUMAN, TPM4_HUMAN, FLNA_HUMAN, ACTG_HUMAN	26	269	12782	16.4481	3.96118e-06	3.96118e-06	3.26173e-05
GOTERM_BP_FAT	GO:0000398~nuclear mRNA splicing, via spliceosome	10	23.2558	3.79193e-10	RBM8A_HUMAN, HNRPU_HUMAN, HNRPL_HUMAN, ROA2_HUMAN, ROA1_HUMAN, DHX9_HUMAN, HNRPM_HUMAN, HNRPK_HUMAN, HNRPD_HUMAN, HNRPC_HUMAN	40	153	13528	22.1046	1.80496e-07	9.02479e-08	5.42276e-07		GOTERM_BP_FAT	GO:0007010~cytoskeleton organization	10	37.037	6.63158e-08	ARPC5_HUMAN, ACTN4_HUMAN, MYH9_HUMAN, COF1_HUMAN, TYB4_HUMAN, PROF1_HUMAN, TLN1_HUMAN, TYB10_HUMAN, FLNA_HUMAN, ACTG_HUMAN	27	436	13528	11.4917	2.93775e-05	9.79259e-06	9.38712e-05
SMART	SM00360:RRM	10	23.2558	1.02828e-09	RBM8A_HUMAN, MATR3_HUMAN, SFPQ_HUMAN, HNRPL_HUMAN, ROA2_HUMAN, NUCL_HUMAN, ROA1_HUMAN, HNRPM_HUMAN, HNRPD_HUMAN, HNRPC_HUMAN	24	211	9079	17.9285	1.64525e-08	1.64525e-08	7.30219e-07		GOTERM_CC_FAT	GO:0005856~cytoskeleton	14	51.8519	3.858e-07	ACTN4_HUMAN, COF1_HUMAN, TYB4_HUMAN, MARE1_HUMAN, TYB10_HUMAN, TPM4_HUMAN, TLN1_HUMAN, ARPC5_HUMAN, MYH9_HUMAN, ACTB_HUMAN, PROF1_HUMAN, TPM3_HUMAN, FLNA_HUMAN, ACTG_HUMAN	26	1381	12782	4.98379	5.55537e-05	1.38887e-05	0.000457454
GOTERM_BP_FAT	GO:0006397~mRNA processing	12	27.907	1.04891e-09	RBM8A_HUMAN, SFPQ_HUMAN, HNRPU_HUMAN, HNRPL_HUMAN, ROA2_HUMAN, ROA1_HUMAN, DHX9_HUMAN, HNRPM_HUMAN, FUBP2_HUMAN, HNRPK_HUMAN, HNRPD_HUMAN, HNRPC_HUMAN	40	321	13528	12.643	4.99281e-07	1.66427e-07	1.50002e-06		SP_PIR_KEYWORDS	cytoplasm	17	62.963	5.79449e-07	ACTN4_HUMAN, CLIC1_HUMAN, COF1_HUMAN, TYB4_HUMAN, MARE1_HUMAN, TYB10_HUMAN, TPM4_HUMAN, TLN1_HUMAN, PGM2_HUMAN, ARPC5_HUMAN, PRDX5_HUMAN, PROF1_HUMAN, ACTB_HUMAN, LDHB_HUMAN, TPM3_HUMAN, FLNA_HUMAN, ACTG_HUMAN	27	3332	19235	3.63473	6.54756e-05	1.63693e-05	0.000657921
GOTERM_CC_FAT	GO:0030530~heterogeneous nuclear ribonucleoprotein complex	6	13.9535	1.06537e-09	HNRPU_HUMAN, HNRPL_HUMAN, ROA2_HUMAN, ROA1_HUMAN, HNRPK_HUMAN, HNRPD_HUMAN	39	17	12782	115.674	1.2891e-07	6.44551e-08	1.22481e-06		KEGG_PATHWAY	hsa04810:Regulation of actin cytoskeleton	8	29.6296	7.15391e-06	ARPC5_HUMAN, ACTN4_HUMAN, MYH9_HUMAN, COF1_HUMAN, TYB4_HUMAN, PROF1_HUMAN, ACTB_HUMAN, ACTG_HUMAN	20	215	5085	9.46047	0.000236052	0.000236052	0.00624413
INTERPRO	IPR000504:RNA recognition motif, RNP-1	10	23.2558	1.74415e-09	RBM8A_HUMAN, MATR3_HUMAN, SFPQ_HUMAN, HNRPL_HUMAN, ROA2_HUMAN, NUCL_HUMAN, ROA1_HUMAN, HNRPM_HUMAN, HNRPD_HUMAN, HNRPC_HUMAN	42	211	16659	18.7982	1.91856e-07	1.91856e-07	1.97058e-06		GOTERM_CC_FAT	GO:0043228~non-membrane-bounded organelle	16	59.2593	1.6124e-05	ACTN4_HUMAN, H2B1C_HUMAN, COF1_HUMAN, TYB4_HUMAN, HBA_HUMAN, MARE1_HUMAN, TYB10_HUMAN, TPM4_HUMAN, TLN1_HUMAN, ARPC5_HUMAN, MYH9_HUMAN, PROF1_HUMAN, ACTB_HUMAN, TPM3_HUMAN, FLNA_HUMAN, ACTG_HUMAN	26	2596	12782	3.02999	0.00231917	0.000386903	0.019117
INTERPRO	IPR012677:Nucleotide-binding, alpha-beta plait	10	23.2558	1.89521e-09	RBM8A_HUMAN, MATR3_HUMAN, SFPQ_HUMAN, HNRPL_HUMAN, ROA2_HUMAN, NUCL_HUMAN, ROA1_HUMAN, HNRPM_HUMAN, HNRPD_HUMAN, HNRPC_HUMAN	42	213	16659	18.6217	2.08473e-07	1.04236e-07	2.14125e-06		GOTERM_CC_FAT	GO:0043232~intracellular non-membrane-bounded organelle	16	59.2593	1.6124e-05	ACTN4_HUMAN, H2B1C_HUMAN, COF1_HUMAN, TYB4_HUMAN, HBA_HUMAN, MARE1_HUMAN, TYB10_HUMAN, TPM4_HUMAN, TLN1_HUMAN, ARPC5_HUMAN, MYH9_HUMAN, PROF1_HUMAN, ACTB_HUMAN, TPM3_HUMAN, FLNA_HUMAN, ACTG_HUMAN	26	2596	12782	3.02999	0.00231917	0.000386903	0.019117
GOTERM_BP_FAT	GO:0006396~RNA processing	14	32.5581	2.07123e-09	RBM8A_HUMAN, DHX9_HUMAN, HNRPM_HUMAN, HNRPK_HUMAN, RS14_HUMAN, HNRPL_HUMAN, SFPQ_HUMAN, HNRPU_HUMAN, ROA2_HUMAN, ROA1_HUMAN, FUBP2_HUMAN, RS28_HUMAN, HNRPD_HUMAN, HNRPC_HUMAN	40	547	13528	8.65594	9.85907e-07	2.46477e-07	2.96203e-06		GOTERM_CC_FAT	GO:0044430~cytoskeletal part	7	25.9259	0.00871636	ARPC5_HUMAN, ACTN4_HUMAN, MYH9_HUMAN, COF1_HUMAN, TPM3_HUMAN, MARE1_HUMAN, TPM4_HUMAN	26	952	12782	3.61482	0.716532	0.0861117	9.85993
UP_SEQ_FEATURE	domain:RRM 2	8	18.6047	2.16067e-09	MATR3_HUMAN, SFPQ_HUMAN, HNRPL_HUMAN, ROA2_HUMAN, NUCL_HUMAN, ROA1_HUMAN, HNRPM_HUMAN, HNRPD_HUMAN	43	101	19113	35.207	4.60222e-07	4.60222e-07	2.73608e-06		SP_PIR_KEYWORDS	coiled coil	4	14.8148	0.523427	MYH9_HUMAN, TPM3_HUMAN, EHD1_HUMAN, TPM4_HUMAN	27	2019	19235	1.41141	1	0.987818	99.9778
UP_SEQ_FEATURE	domain:RRM 1	8	18.6047	2.16067e-09	MATR3_HUMAN, SFPQ_HUMAN, HNRPL_HUMAN, ROA2_HUMAN, NUCL_HUMAN, ROA1_HUMAN, HNRPM_HUMAN, HNRPD_HUMAN	43	101	19113	35.207	4.60222e-07	4.60222e-07	2.73608e-06		UP_SEQ_FEATURE	splice variant	6	22.2222	0.991359	ARPC5_HUMAN, PRDX5_HUMAN, MYH9_HUMAN, TPM3_HUMAN, TPM4_HUMAN, FLNA_HUMAN	27	7458	19113	0.5695	1	1	100
SP_PIR_KEYWORDS	viral nucleoprotein	6	13.9535	4.43234e-09	HNRPU_HUMAN, HNRPL_HUMAN, AHNK_HUMAN, ROA1_HUMAN, HNRPM_HUMAN, HNRPK_HUMAN	43	29	19235	92.5501	5.71771e-07	1.42943e-07	5.15457e-06		SP_PIR_KEYWORDS	alternative splicing	5	18.5185	0.997788	ARPC5_HUMAN, MYH9_HUMAN, TPM3_HUMAN, TPM4_HUMAN, FLNA_HUMAN	27	7488	19235	0.475699	1	1	100
GOTERM_BP_FAT	GO:0016071~mRNA metabolic process	12	27.907	4.65876e-09	RBM8A_HUMAN, SFPQ_HUMAN, HNRPU_HUMAN, HNRPL_HUMAN, ROA2_HUMAN, ROA1_HUMAN, DHX9_HUMAN, HNRPM_HUMAN, FUBP2_HUMAN, HNRPK_HUMAN, HNRPD_HUMAN, HNRPC_HUMAN	40	370	13528	10.9686	2.21757e-06	4.43514e-07	6.6624e-06
SP_PIR_KEYWORDS	mrna splicing	9	20.9302	1.46042e-08	RBM8A_HUMAN, SFPQ_HUMAN, HNRPU_HUMAN, ROA2_HUMAN, ROA1_HUMAN, HNRPM_HUMAN, FUBP2_HUMAN, HNRPK_HUMAN, HNRPC_HUMAN	43	209	19235	19.2628	1.88394e-06	3.76788e-07	1.69839e-05		Annotation Cluster 2	Enrichment Score: 4.397943126381859
SP_PIR_KEYWORDS	methylation	9	20.9302	4.56322e-08	SFPQ_HUMAN, HNRPU_HUMAN, ROA2_HUMAN, NUCL_HUMAN, ILF3_HUMAN, ROA1_HUMAN, DHX9_HUMAN, HNRPK_HUMAN, HNRPD_HUMAN	43	242	19235	16.6361	5.88653e-06	9.81091e-07	5.30678e-05		Category	Term	Count	%	p-Value	Genes	List Total	Pop Hits	Pop Total	Fold Enrichment	Bonferroni	Benjamini	FDR
SP_PIR_KEYWORDS	mrna processing	9	20.9302	7.93795e-08	RBM8A_HUMAN, SFPQ_HUMAN, HNRPU_HUMAN, ROA2_HUMAN, ROA1_HUMAN, HNRPM_HUMAN, FUBP2_HUMAN, HNRPK_HUMAN, HNRPC_HUMAN	43	260	19235	15.4843	1.02399e-05	1.27999e-06	9.23142e-05		GOTERM_BP_FAT	GO:0051235~maintenance of location	6	22.2222	1.2315e-07	ENPL_HUMAN, TYB4_HUMAN, PDIA3_HUMAN, TLN1_HUMAN, TYB10_HUMAN, FLNA_HUMAN	27	64	13528	46.9722	5.4554e-05	1.36388e-05	0.000174321
SP_PIR_KEYWORDS	Spliceosome	7	16.2791	2.26978e-07	RBM8A_HUMAN, HNRPU_HUMAN, ROA2_HUMAN, ROA1_HUMAN, HNRPM_HUMAN, HNRPK_HUMAN, HNRPC_HUMAN	43	120	19235	26.094	2.92797e-05	3.25335e-06	0.000263963		GOTERM_BP_FAT	GO:0045185~maintenance of protein location	5	18.5185	1.96934e-06	TYB4_HUMAN, PDIA3_HUMAN, TLN1_HUMAN, TYB10_HUMAN, FLNA_HUMAN	27	48	13528	52.1914	0.000872038	0.000174468	0.0027876
GOTERM_CC_FAT	GO:0005681~spliceosome	7	16.2791	2.27799e-06	RBM8A_HUMAN, HNRPU_HUMAN, ROA2_HUMAN, ROA1_HUMAN, HNRPM_HUMAN, HNRPK_HUMAN, HNRPC_HUMAN	39	132	12782	17.3803	0.0002756	2.50577e-05	0.00261888		GOTERM_BP_FAT	GO:0032507~maintenance of protein location in cell	3	11.1111	0.00278151	PDIA3_HUMAN, TLN1_HUMAN, FLNA_HUMAN	27	41	13528	36.6612	0.708852	0.0628795	3.86605
KEGG_PATHWAY	hsa03040:Spliceosome	6	13.9535	2.12333e-05	RBM8A_HUMAN, HNRPU_HUMAN, ROA1_HUMAN, HNRPM_HUMAN, HNRPK_HUMAN, HNRPC_HUMAN	16	126	5085	15.1339	0.00025477	0.00025477	0.01366		GOTERM_BP_FAT	GO:0051651~maintenance of location in cell	3	11.1111	0.00379482	PDIA3_HUMAN, TLN1_HUMAN, FLNA_HUMAN	27	48	13528	31.3148	0.814427	0.0807666	5.2396
UP_SEQ_FEATURE	region of interest:RNA-binding RGG-box	3	6.97674	9.83074e-05	HNRPU_HUMAN, ROA1_HUMAN, HNRPK_HUMAN	43	7	19113	190.495	0.0207228	0.00695586	0.124417
SP_PIR_KEYWORDS	nucleus	20	46.5116	0.000792844	RBM8A_HUMAN, MATR3_HUMAN, BCLF1_HUMAN, NPM_HUMAN, ILF3_HUMAN, DHX9_HUMAN, HNRPM_HUMAN, HNRPK_HUMAN, HNRPU_HUMAN, HNRPL_HUMAN, SFPQ_HUMAN, ROA2_HUMAN, NUCL_HUMAN, AHNK_HUMAN, S10A6_HUMAN, ROA1_HUMAN, FUBP1_HUMAN, FUBP2_HUMAN, HNRPD_HUMAN, HNRPC_HUMAN	43	4283	19235	2.08884	0.097257	0.00679795	0.91816		Annotation Cluster 3	Enrichment Score: 2.846525017355367
GOTERM_MF_FAT	GO:0000166~nucleotide binding	16	37.2093	0.00184914	RBM8A_HUMAN, MATR3_HUMAN, CH10_HUMAN, DHX9_HUMAN, HNRPM_HUMAN, ACADM_HUMAN, HNRPL_HUMAN, SFPQ_HUMAN, HNRPU_HUMAN, EF2_HUMAN, ROA2_HUMAN, NUCL_HUMAN, ROA1_HUMAN, PEBP1_HUMAN, HNRPD_HUMAN, HNRPC_HUMAN	41	2245	12983	2.25681	0.206543	0.0378254	2.1176		Category	Term	Count	%	p-Value	Genes	List Total	Pop Hits	Pop Total	Fold Enrichment	Bonferroni	Benjamini	FDR
GOTERM_MF_FAT	GO:0003677~DNA binding	12	27.907	0.0899952	BCLF1_HUMAN, SFPQ_HUMAN, HNRPU_HUMAN, ROA2_HUMAN, NUCL_HUMAN, ILF3_HUMAN, FUBP1_HUMAN, ROA1_HUMAN, DHX9_HUMAN, FUBP2_HUMAN, HNRPK_HUMAN, HNRPD_HUMAN	41	2331	12983	1.63016	0.999992	0.692358	66.3971		GOTERM_BP_FAT	GO:0051493~regulation of cytoskeleton organization	5	18.5185	0.00012304	ARPC5_HUMAN, COF1_HUMAN, TYB4_HUMAN, MARE1_HUMAN, TYB10_HUMAN	27	136	13528	18.4205	0.0530509	0.00775689	0.174024
SP_PIR_KEYWORDS	alternative splicing	17	39.5349	0.601747	RBM8A_HUMAN, BCLF1_HUMAN, NPM_HUMAN, ILF3_HUMAN, TXND5_HUMAN, GANAB_HUMAN, HNRPM_HUMAN, HNRPK_HUMAN, ACADM_HUMAN, HNRPU_HUMAN, SFPQ_HUMAN, ROA2_HUMAN, ROA1_HUMAN, FUBP1_HUMAN, FUBP2_HUMAN, HNRPD_HUMAN, HNRPC_HUMAN	43	7488	19235	1.01556	1	0.975558	99.9978		GOTERM_BP_FAT	GO:0008064~regulation of actin polymerization or depolymerization	4	14.8148	0.000210659	ARPC5_HUMAN, COF1_HUMAN, TYB4_HUMAN, TYB10_HUMAN	27	61	13528	32.8549	0.0891087	0.0115987	0.297779
UP_SEQ_FEATURE	splice variant	17	39.5349	0.606452	RBM8A_HUMAN, BCLF1_HUMAN, NPM_HUMAN, ILF3_HUMAN, TXND5_HUMAN, GANAB_HUMAN, HNRPM_HUMAN, HNRPK_HUMAN, ACADM_HUMAN, HNRPU_HUMAN, SFPQ_HUMAN, ROA2_HUMAN, ROA1_HUMAN, FUBP1_HUMAN, FUBP2_HUMAN, HNRPD_HUMAN, HNRPC_HUMAN	43	7458	19113	1.01318	1	0.999992	99.9993		GOTERM_BP_FAT	GO:0030832~regulation of actin filament length	4	14.8148	0.000231847	ARPC5_HUMAN, COF1_HUMAN, TYB4_HUMAN, TYB10_HUMAN	27	63	13528	31.8119	0.0976206	0.0113485	0.327684
														GOTERM_BP_FAT	GO:0032271~regulation of protein polymerization	4	14.8148	0.000290737	ARPC5_HUMAN, TYB4_HUMAN, MARE1_HUMAN, TYB10_HUMAN	27	68	13528	29.4728	0.120864	0.0127989	0.410758
Annotation Cluster 2	Enrichment Score: 7.14506280575044													GOTERM_BP_FAT	GO:0032956~regulation of actin cytoskeleton organization	4	14.8148	0.000641431	ARPC5_HUMAN, COF1_HUMAN, TYB4_HUMAN, TYB10_HUMAN	27	89	13528	22.5185	0.247418	0.0255094	0.904136
Category	Term	Count	%	PValue	Genes	List Total	Pop Hits	Pop Total	Fold Enrichment	Bonferroni	Benjamini	FDR		GOTERM_BP_FAT	GO:0043254~regulation of protein complex assembly	4	14.8148	0.000662705	ARPC5_HUMAN, TYB4_HUMAN, MARE1_HUMAN, TYB10_HUMAN	27	90	13528	22.2683	0.254482	0.0241759	0.933993
GOTERM_CC_FAT	GO:0070013~intracellular organelle lumen	21	48.8372	1.82139e-08	RBM8A_HUMAN, MATR3_HUMAN, NPM_HUMAN, MOES_HUMAN, TXND5_HUMAN, ILF3_HUMAN, CH10_HUMAN, DHX9_HUMAN, HNRPM_HUMAN, HNRPK_HUMAN, ACADM_HUMAN, RS14_HUMAN, S10A4_HUMAN, HNRPL_HUMAN, SFPQ_HUMAN, ROA2_HUMAN, NUCL_HUMAN, ROA1_HUMAN, FUBP1_HUMAN, PHB_HUMAN, RS13_HUMAN	39	1779	12782	3.86881	2.20388e-06	7.34628e-07	2.09398e-05		GOTERM_BP_FAT	GO:0032970~regulation of actin filament-based process	4	14.8148	0.000706595	ARPC5_HUMAN, COF1_HUMAN, TYB4_HUMAN, TYB10_HUMAN	27	92	13528	21.7842	0.268847	0.0237993	0.995563
GOTERM_CC_FAT	GO:0043233~organelle lumen	21	48.8372	2.70379e-08	RBM8A_HUMAN, MATR3_HUMAN, NPM_HUMAN, MOES_HUMAN, TXND5_HUMAN, ILF3_HUMAN, CH10_HUMAN, DHX9_HUMAN, HNRPM_HUMAN, HNRPK_HUMAN, ACADM_HUMAN, RS14_HUMAN, S10A4_HUMAN, HNRPL_HUMAN, SFPQ_HUMAN, ROA2_HUMAN, NUCL_HUMAN, ROA1_HUMAN, FUBP1_HUMAN, PHB_HUMAN, RS13_HUMAN	39	1820	12782	3.78166	3.27158e-06	8.17896e-07	3.10843e-05		GOTERM_BP_FAT	GO:0033043~regulation of organelle organization	5	18.5185	0.000729678	ARPC5_HUMAN, COF1_HUMAN, TYB4_HUMAN, MARE1_HUMAN, TYB10_HUMAN	27	217	13528	11.5446	0.276291	0.0228328	1.02793
GOTERM_CC_FAT	GO:0031974~membrane-enclosed lumen	21	48.8372	3.79197e-08	RBM8A_HUMAN, MATR3_HUMAN, NPM_HUMAN, MOES_HUMAN, TXND5_HUMAN, ILF3_HUMAN, CH10_HUMAN, DHX9_HUMAN, HNRPM_HUMAN, HNRPK_HUMAN, ACADM_HUMAN, RS14_HUMAN, S10A4_HUMAN, HNRPL_HUMAN, SFPQ_HUMAN, ROA2_HUMAN, NUCL_HUMAN, ROA1_HUMAN, FUBP1_HUMAN, PHB_HUMAN, RS13_HUMAN	39	1856	12782	3.70831	4.58827e-06	9.17656e-07	4.35946e-05		GOTERM_BP_FAT	GO:0032272~negative regulation of protein polymerization	3	11.1111	0.00139683	TYB4_HUMAN, MARE1_HUMAN, TYB10_HUMAN	27	29	13528	51.8314	0.461639	0.0379623	1.95917
GOTERM_CC_FAT	GO:0031981~nuclear lumen	18	41.8605	2.16396e-07	RBM8A_HUMAN, MATR3_HUMAN, NPM_HUMAN, MOES_HUMAN, ILF3_HUMAN, DHX9_HUMAN, HNRPM_HUMAN, HNRPK_HUMAN, RS14_HUMAN, S10A4_HUMAN, HNRPL_HUMAN, SFPQ_HUMAN, ROA2_HUMAN, NUCL_HUMAN, ROA1_HUMAN, FUBP1_HUMAN, PHB_HUMAN, RS13_HUMAN	39	1450	12782	4.06854	2.61836e-05	4.36399e-06	0.000248781		GOTERM_BP_FAT	GO:0031333~negative regulation of protein complex assembly	3	11.1111	0.00191874	TYB4_HUMAN, MARE1_HUMAN, TYB10_HUMAN	27	34	13528	44.2092	0.572934	0.0488163	2.682
GOTERM_CC_FAT	GO:0005730~nucleolus	13	30.2326	4.65795e-07	NPM_HUMAN, MOES_HUMAN, ILF3_HUMAN, DHX9_HUMAN, HNRPM_HUMAN, HNRPK_HUMAN, RS14_HUMAN, S10A4_HUMAN, ROA2_HUMAN, NUCL_HUMAN, ROA1_HUMAN, FUBP1_HUMAN, RS13_HUMAN	39	698	12782	6.10411	5.63596e-05	8.05156e-06	0.000535503		GOTERM_BP_FAT	GO:0044087~regulation of cellular component biogenesis	4	14.8148	0.00246667	ARPC5_HUMAN, TYB4_HUMAN, MARE1_HUMAN, TYB10_HUMAN	27	142	13528	14.1137	0.665154	0.0589721	3.43553
														GOTERM_BP_FAT	GO:0030833~regulation of actin filament polymerization	3	11.1111	0.00478027	ARPC5_HUMAN, TYB4_HUMAN, TYB10_HUMAN	27	54	13528	27.8354	0.880296	0.0961417	6.55786
Annotation Cluster 3	Enrichment Score: 5.897359428759628													GOTERM_BP_FAT	GO:0051494~negative regulation of cytoskeleton organization	3	11.1111	0.00495481	TYB4_HUMAN, MARE1_HUMAN, TYB10_HUMAN	27	55	13528	27.3293	0.889245	0.0951806	6.78958
Category	Term	Count	%	PValue	Genes	List Total	Pop Hits	Pop Total	Fold Enrichment	Bonferroni	Benjamini	FDR		GOTERM_BP_FAT	GO:0010639~negative regulation of organelle organization	3	11.1111	0.0107344	TYB4_HUMAN, MARE1_HUMAN, TYB10_HUMAN	27	82	13528	18.3306	0.991613	0.180622	14.1672
GOTERM_CC_FAT	GO:0005730~nucleolus	13	30.2326	4.65795e-07	NPM_HUMAN, MOES_HUMAN, ILF3_HUMAN, DHX9_HUMAN, HNRPM_HUMAN, HNRPK_HUMAN, RS14_HUMAN, S10A4_HUMAN, ROA2_HUMAN, NUCL_HUMAN, ROA1_HUMAN, FUBP1_HUMAN, RS13_HUMAN	39	698	12782	6.10411	5.63596e-05	8.05156e-06	0.000535503		GOTERM_BP_FAT	GO:0032535~regulation of cellular component size	4	14.8148	0.0147063	ARPC5_HUMAN, COF1_HUMAN, TYB4_HUMAN, TYB10_HUMAN	27	271	13528	7.39538	0.998589	0.230898	18.9186
GOTERM_CC_FAT	GO:0043228~non-membrane-bounded organelle	22	51.1628	2.08864e-06	NPM_HUMAN, VIME_HUMAN, MOES_HUMAN, ILF3_HUMAN, RS21_HUMAN, DHX9_HUMAN, HNRPM_HUMAN, HNRPK_HUMAN, EZRI_HUMAN, RS14_HUMAN, RL8_HUMAN, S10A4_HUMAN, ROA2_HUMAN, NUCL_HUMAN, LSP1_HUMAN, ROA1_HUMAN, FUBP1_HUMAN, RS28_HUMAN, PEBP1_HUMAN, HNRPD_HUMAN, RS13_HUMAN	39	2596	12782	2.77749	0.000252694	2.52723e-05	0.00240119		GOTERM_BP_FAT	GO:0051129~negative regulation of cellular component organization	3	11.1111	0.0301627	TYB4_HUMAN, MARE1_HUMAN, TYB10_HUMAN	27	142	13528	10.5853	0.999999	0.36381	35.1783
GOTERM_CC_FAT	GO:0043232~intracellular non-membrane-bounded organelle	22	51.1628	2.08864e-06	NPM_HUMAN, VIME_HUMAN, MOES_HUMAN, ILF3_HUMAN, RS21_HUMAN, DHX9_HUMAN, HNRPM_HUMAN, HNRPK_HUMAN, EZRI_HUMAN, RS14_HUMAN, RL8_HUMAN, S10A4_HUMAN, ROA2_HUMAN, NUCL_HUMAN, LSP1_HUMAN, ROA1_HUMAN, FUBP1_HUMAN, RS28_HUMAN, PEBP1_HUMAN, HNRPD_HUMAN, RS13_HUMAN	39	2596	12782	2.77749	0.000252694	2.52723e-05	0.00240119
														Annotation Cluster 4	Enrichment Score: 2.7804523107478403
Annotation Cluster 4	Enrichment Score: 3.9927160297586646													Category	Term	Count	%	p-Value	Genes	List Total	Pop Hits	Pop Total	Fold Enrichment	Bonferroni	Benjamini	FDR
Category	Term	Count	%	PValue	Genes	List Total	Pop Hits	Pop Total	Fold Enrichment	Bonferroni	Benjamini	FDR		GOTERM_CC_FAT	GO:0030863~cortical cytoskeleton	6	22.2222	3.36692e-08	ACTN4_HUMAN, MYH9_HUMAN, COF1_HUMAN, ACTB_HUMAN, MARE1_HUMAN, ACTG_HUMAN	26	49	12782	60.1978	4.84835e-06	2.42418e-06	3.99225e-05
GOTERM_BP_FAT	GO:0006414~translational elongation	7	16.2791	3.9847e-07	RL8_HUMAN, RS14_HUMAN, EF2_HUMAN, RS21_HUMAN, RS28_HUMAN, RS13_HUMAN	40	101	13528	23.4396	0.000189654	3.16114e-05	0.000569841		GOTERM_CC_FAT	GO:0005938~cell cortex	7	25.9259	2.96677e-07	ACTN4_HUMAN, MYH9_HUMAN, COF1_HUMAN, ACTB_HUMAN, MARE1_HUMAN, FLNA_HUMAN, ACTG_HUMAN	26	146	12782	23.5706	4.27206e-05	1.42404e-05	0.000351778
SP_PIR_KEYWORDS	ribosome	6	13.9535	5.22395e-07	RL8_HUMAN, RS14_HUMAN, RS21_HUMAN, RS28_HUMAN, RS13_HUMAN	43	73	19235	36.7665	6.73867e-05	6.73888e-06	0.000607516		GOTERM_CC_FAT	GO:0044448~cell cortex part	6	22.2222	4.90358e-07	ACTN4_HUMAN, MYH9_HUMAN, COF1_HUMAN, ACTB_HUMAN, MARE1_HUMAN, ACTG_HUMAN	26	83	12782	35.5385	7.06091e-05	1.41222e-05	0.00058143
GOTERM_CC_FAT	GO:0015935~small ribosomal subunit	6	13.9535	1.09593e-06	RS14_HUMAN, NPM_HUMAN, RS21_HUMAN, RS28_HUMAN, RS13_HUMAN	39	63	12782	31.2137	0.000132599	1.65759e-05	0.00125994		KEGG_PATHWAY	hsa04510:Focal adhesion	5	18.5185	0.00575426	ACTN4_HUMAN, ACTB_HUMAN, TLN1_HUMAN, FLNA_HUMAN, ACTG_HUMAN	20	201	5085	6.32463	0.173404	0.0464942	4.91236
GOTERM_CC_FAT	GO:0033279~ribosomal subunit	7	16.2791	1.90338e-06	RL8_HUMAN, RS14_HUMAN, NPM_HUMAN, RS21_HUMAN, RS28_HUMAN, RS13_HUMAN	39	128	12782	17.9235	0.000230283	2.55896e-05	0.00218821		KEGG_PATHWAY	hsa04530:Tight junction	4	14.8148	0.0127293	ACTN4_HUMAN, MYH9_HUMAN, ACTB_HUMAN, ACTG_HUMAN	20	134	5085	7.58955	0.344766	0.0810768	10.5796
SP_PIR_KEYWORDS	protein biosynthesis	7	16.2791	3.15123e-06	RL8_HUMAN, RS14_HUMAN, EF2_HUMAN, RS21_HUMAN, RS28_HUMAN, RS13_HUMAN	43	188	19235	16.6557	0.000406426	3.69547e-05	0.00366465		SP_PIR_KEYWORDS	mitosis	3	11.1111	0.0251894	ACTB_HUMAN, MARE1_HUMAN, ACTG_HUMAN	27	183	19235	11.6788	0.944026	0.250453	25.1491
GOTERM_CC_FAT	GO:0022626~cytosolic ribosome	6	13.9535	3.84289e-06	RL8_HUMAN, RS14_HUMAN, RS21_HUMAN, RS28_HUMAN, RS13_HUMAN	39	81	12782	24.2773	0.000464883	3.87485e-05	0.00441792		KEGG_PATHWAY	hsa05412:Arrhythmogenic right ventricular cardiomyopathy (ARVC)	3	11.1111	0.0319891	ACTN4_HUMAN, ACTB_HUMAN, ACTG_HUMAN	20	76	5085	10.0362	0.657982	0.125508	24.7068
GOTERM_CC_FAT	GO:0022627~cytosolic small ribosomal subunit	5	11.6279	5.62032e-06	RS14_HUMAN, RS21_HUMAN, RS28_HUMAN, RS13_HUMAN	39	40	12782	40.9679	0.00067983	5.2311e-05	0.00646125		KEGG_PATHWAY	hsa04520:Adherens junction	3	11.1111	0.0327697	ACTN4_HUMAN, ACTB_HUMAN, ACTG_HUMAN	20	77	5085	9.90584	0.666967	0.115001	25.2351
GOTERM_CC_FAT	GO:0005840~ribosome	7	16.2791	3.71948e-05	RL8_HUMAN, RS14_HUMAN, NPM_HUMAN, RS21_HUMAN, RS28_HUMAN, RS13_HUMAN	39	215	12782	10.6707	0.00449054	0.000321423	0.0427529		GOTERM_BP_FAT	GO:0032989~cellular component morphogenesis	4	14.8148	0.0395764	MYH9_HUMAN, COF1_HUMAN, ACTB_HUMAN, ACTG_HUMAN	27	397	13528	5.04823	1	0.418464	43.5377
SP_PIR_KEYWORDS	ribosomal protein	6	13.9535	5.36443e-05	RL8_HUMAN, RS14_HUMAN, RS21_HUMAN, RS28_HUMAN, RS13_HUMAN	43	188	19235	14.2763	0.00689642	0.00053219	0.0623678		KEGG_PATHWAY	hsa04670:Leukocyte transendothelial migration	3	11.1111	0.0706381	ACTN4_HUMAN, ACTB_HUMAN, ACTG_HUMAN	20	118	5085	6.46398	0.910854	0.214746	47.2404
GOTERM_CC_FAT	GO:0044445~cytosolic part	6	13.9535	8.14273e-05	RL8_HUMAN, RS14_HUMAN, RS21_HUMAN, RS28_HUMAN, RS13_HUMAN	39	152	12782	12.9372	0.00980472	0.000656658	0.0935734		GOTERM_BP_FAT	GO:0051301~cell division	3	11.1111	0.109443	MYH9_HUMAN, COF1_HUMAN, MARE1_HUMAN	27	295	13528	5.09529	1	0.750368	80.6157
GOTERM_MF_FAT	GO:0003735~structural constituent of ribosome	6	13.9535	0.000155915	RL8_HUMAN, RS14_HUMAN, RS21_HUMAN, RS28_HUMAN, RS13_HUMAN	41	168	12983	11.3092	0.0193022	0.00647592	0.180154		GOTERM_BP_FAT	GO:0000902~cell morphogenesis	3	11.1111	0.148728	MYH9_HUMAN, COF1_HUMAN, ACTB_HUMAN	27	356	13528	4.22222	1	0.817026	89.7646
GOTERM_BP_FAT	GO:0006412~translation	7	16.2791	0.000338364	RL8_HUMAN, RS14_HUMAN, EF2_HUMAN, RS21_HUMAN, RS28_HUMAN, RS13_HUMAN	40	331	13528	7.15227	0.148783	0.0159798	0.482801
GOTERM_BP_FAT	GO:0042274~ribosomal small subunit biogenesis	3	6.97674	0.000438174	RS14_HUMAN, NPM_HUMAN, RS28_HUMAN	40	11	13528	92.2364	0.188293	0.0187864	0.6248		Annotation Cluster 5	Enrichment Score: 2.6805538476767916
GOTERM_MF_FAT	GO:0005198~structural molecule activity	9	20.9302	0.000593406	RL8_HUMAN, MATR3_HUMAN, RS14_HUMAN, VIME_HUMAN, MOES_HUMAN, RS21_HUMAN, RS28_HUMAN, RS13_HUMAN	41	634	12983	4.49515	0.071512	0.0183785	0.684075		Category	Term	Count	%	p-Value	Genes	List Total	Pop Hits	Pop Total	Fold Enrichment	Bonferroni	Benjamini	FDR
KEGG_PATHWAY	hsa03010:Ribosome	4	9.30233	0.00189701	RL8_HUMAN, RS21_HUMAN, RS28_HUMAN, RS13_HUMAN	16	87	5085	14.6121	0.0225281	0.0113282	1.2142		GOTERM_BP_FAT	GO:0006928~cell motion	8	29.6296	2.3172e-05	ARPC5_HUMAN, MYH9_HUMAN, COF1_HUMAN, ACTB_HUMAN, TPM3_HUMAN, TLN1_HUMAN, TPM4_HUMAN, ACTG_HUMAN	27	475	13528	8.43852	0.0102128	0.00170942	0.0327954
GOTERM_CC_FAT	GO:0005829~cytosol	10	23.2558	0.0140225	RL8_HUMAN, RS14_HUMAN, NPM_HUMAN, VIME_HUMAN, RS21_HUMAN, RS28_HUMAN, EZRI_HUMAN, HNRPD_HUMAN, RS13_HUMAN	39	1330	12782	2.46424	0.818905	0.0956274	14.9858		GOTERM_MF_FAT	GO:0005200~structural constituent of cytoskeleton	4	14.8148	0.000373595	ARPC5_HUMAN, ACTB_HUMAN, TLN1_HUMAN, ACTG_HUMAN	26	74	12983	26.9917	0.0481271	0.0163068	0.435384
SP_PIR_KEYWORDS	blocked amino end	3	6.97674	0.0172096	RS21_HUMAN, RS28_HUMAN	43	92	19235	14.5867	0.893473	0.101147	18.2807		KEGG_PATHWAY	hsa05410:Hypertrophic cardiomyopathy (HCM)	4	14.8148	0.00360006	ACTB_HUMAN, TPM3_HUMAN, TPM4_HUMAN, ACTG_HUMAN	20	85	5085	11.9647	0.112207	0.0577722	3.09896
GOTERM_BP_FAT	GO:0042254~ribosome biogenesis	3	6.97674	0.0481296	RS14_HUMAN, NPM_HUMAN, RS28_HUMAN	40	122	13528	8.31639	1	0.656044	50.6092		KEGG_PATHWAY	hsa05414:Dilated cardiomyopathy	4	14.8148	0.00450218	ACTB_HUMAN, TPM3_HUMAN, TPM4_HUMAN, ACTG_HUMAN	20	92	5085	11.0543	0.138351	0.0484241	3.86205
GOTERM_BP_FAT	GO:0022613~ribonucleoprotein complex biogenesis	3	6.97674	0.0947689	RS14_HUMAN, NPM_HUMAN, RS28_HUMAN	40	180	13528	5.63667	1	0.793977	75.9217		KEGG_PATHWAY	hsa05130:Pathogenic Escherichia coli infection	3	11.1111	0.0186828	ARPC5_HUMAN, ACTB_HUMAN, ACTG_HUMAN	20	57	5085	13.3816	0.463326	0.0985291	15.178
														GOTERM_MF_FAT	GO:0005198~structural molecule activity	5	18.5185	0.0314874	ARPC5_HUMAN, ACTB_HUMAN, TLN1_HUMAN, TPM4_HUMAN, ACTG_HUMAN	26	634	12983	3.93806	0.985348	0.570286	31.1745
Annotation Cluster 5	Enrichment Score: 3.547656381690199
Category	Term	Count	%	PValue	Genes	List Total	Pop Hits	Pop Total	Fold Enrichment	Bonferroni	Benjamini	FDR		Annotation Cluster 6	Enrichment Score: 2.16957701167717
SP_PIR_KEYWORDS	mrna splicing	9	20.9302	1.46042e-08	RBM8A_HUMAN, SFPQ_HUMAN, HNRPU_HUMAN, ROA2_HUMAN, ROA1_HUMAN, HNRPM_HUMAN, FUBP2_HUMAN, HNRPK_HUMAN, HNRPC_HUMAN	43	209	19235	19.2628	1.88394e-06	3.76788e-07	1.69839e-05		Category	Term	Count	%	p-Value	Genes	List Total	Pop Hits	Pop Total	Fold Enrichment	Bonferroni	Benjamini	FDR
SP_PIR_KEYWORDS	mrna processing	9	20.9302	7.93795e-08	RBM8A_HUMAN, SFPQ_HUMAN, HNRPU_HUMAN, ROA2_HUMAN, ROA1_HUMAN, HNRPM_HUMAN, FUBP2_HUMAN, HNRPK_HUMAN, HNRPC_HUMAN	43	260	19235	15.4843	1.02399e-05	1.27999e-06	9.23142e-05		GOTERM_CC_FAT	GO:0005938~cell cortex	7	25.9259	2.96677e-07	ACTN4_HUMAN, MYH9_HUMAN, COF1_HUMAN, ACTB_HUMAN, MARE1_HUMAN, FLNA_HUMAN, ACTG_HUMAN	26	146	12782	23.5706	4.27206e-05	1.42404e-05	0.000351778
GOTERM_BP_FAT	GO:0050657~nucleic acid transport	5	11.6279	0.000168534	RBM8A_HUMAN, NPM_HUMAN, ROA2_HUMAN, ROA1_HUMAN, FUBP2_HUMAN	40	97	13528	17.433	0.077095	0.0113959	0.240747		GOTERM_MF_FAT	GO:0051015~actin filament binding	3	11.1111	0.00461918	ACTN4_HUMAN, MYH9_HUMAN, FLNA_HUMAN	26	53	12983	28.2649	0.457271	0.141687	5.26284
GOTERM_BP_FAT	GO:0050658~RNA transport	5	11.6279	0.000168534	RBM8A_HUMAN, NPM_HUMAN, ROA2_HUMAN, ROA1_HUMAN, FUBP2_HUMAN	40	97	13528	17.433	0.077095	0.0113959	0.240747		GOTERM_MF_FAT	GO:0042802~identical protein binding	5	18.5185	0.0324459	ACTN4_HUMAN, MYH9_HUMAN, LDHB_HUMAN, FLNA_HUMAN, ACTG_HUMAN	26	640	12983	3.90114	0.987143	0.515989	31.9657
GOTERM_BP_FAT	GO:0051236~establishment of RNA localization	5	11.6279	0.000168534	RBM8A_HUMAN, NPM_HUMAN, ROA2_HUMAN, ROA1_HUMAN, FUBP2_HUMAN	40	97	13528	17.433	0.077095	0.0113959	0.240747		GOTERM_BP_FAT	GO:0045184~establishment of protein localization	5	18.5185	0.057215	ACTN4_HUMAN, ENPL_HUMAN, MYH9_HUMAN, PDIA3_HUMAN, FLNA_HUMAN	27	769	13528	3.25772	1	0.535899	56.5683
GOTERM_BP_FAT	GO:0006403~RNA localization	5	11.6279	0.000189554	RBM8A_HUMAN, NPM_HUMAN, ROA2_HUMAN, ROA1_HUMAN, FUBP2_HUMAN	40	100	13528	16.91	0.0862848	0.0112162	0.270736		GOTERM_MF_FAT	GO:0042803~protein homodimerization activity	3	11.1111	0.134567	ACTN4_HUMAN, MYH9_HUMAN, FLNA_HUMAN	26	334	12983	4.48515	1	0.879932	81.5044
GOTERM_BP_FAT	GO:0015931~nucleobase, nucleoside, nucleotide and nucleic acid transport	5	11.6279	0.000303001	RBM8A_HUMAN, NPM_HUMAN, ROA2_HUMAN, ROA1_HUMAN, FUBP2_HUMAN	40	113	13528	14.9646	0.134329	0.0159001	0.432444		GOTERM_MF_FAT	GO:0046983~protein dimerization activity	3	11.1111	0.280595	ACTN4_HUMAN, MYH9_HUMAN, FLNA_HUMAN	26	542	12983	2.76391	1	0.922476	97.8627
SP_PIR_KEYWORDS	mRNA transport	3	6.97674	0.0113821	RBM8A_HUMAN, ROA1_HUMAN, FUBP2_HUMAN	43	74	19235	18.1348	0.771611	0.0787642	12.4646
GOTERM_CC_FAT	GO:0005654~nucleoplasm	8	18.6047	0.013967	RBM8A_HUMAN, NPM_HUMAN, HNRPL_HUMAN, ROA2_HUMAN, NUCL_HUMAN, ROA1_HUMAN, PHB_HUMAN, HNRPK_HUMAN	39	882	12782	2.97273	0.817668	0.100908	14.9308		Annotation Cluster 7	Enrichment Score: 2.148497542034633
GOTERM_BP_FAT	GO:0051028~mRNA transport	3	6.97674	0.0259729	RBM8A_HUMAN, ROA1_HUMAN, FUBP2_HUMAN	40	87	13528	11.6621	0.999996	0.465447	31.3632		Category	Term	Count	%	p-Value	Genes	List Total	Pop Hits	Pop Total	Fold Enrichment	Bonferroni	Benjamini	FDR
SP_PIR_KEYWORDS	transport	4	9.30233	0.718631	RBM8A_HUMAN, ROA1_HUMAN, TRFL_HUMAN, FUBP2_HUMAN	43	1670	19235	1.07144	1	0.992967	100		SP_PIR_KEYWORDS	disease mutation	9	33.3333	0.000868046	ACTN4_HUMAN, MYH9_HUMAN, HBB_HUMAN, ACTB_HUMAN, LDHB_HUMAN, HBA_HUMAN, TPM3_HUMAN, FLNA_HUMAN, ACTG_HUMAN	27	1591	19235	4.02996	0.0934705	0.013921	0.981187
														KEGG_PATHWAY	hsa04530:Tight junction	4	14.8148	0.0127293	ACTN4_HUMAN, MYH9_HUMAN, ACTB_HUMAN, ACTG_HUMAN	20	134	5085	7.58955	0.344766	0.0810768	10.5796
Annotation Cluster 6	Enrichment Score: 2.7272442995323445													GOTERM_MF_FAT	GO:0042802~identical protein binding	5	18.5185	0.0324459	ACTN4_HUMAN, MYH9_HUMAN, LDHB_HUMAN, FLNA_HUMAN, ACTG_HUMAN	26	640	12983	3.90114	0.987143	0.515989	31.9657
Category	Term	Count	%	PValue	Genes	List Total	Pop Hits	Pop Total	Fold Enrichment	Bonferroni	Benjamini	FDR
UP_SEQ_FEATURE	domain:KH 3	3	6.97674	0.00042186	FUBP1_HUMAN, FUBP2_HUMAN, HNRPK_HUMAN	43	14	19113	95.2475	0.0859546	0.0222182	0.532894		Annotation Cluster 8	Enrichment Score: 2.019931976043379
UP_SEQ_FEATURE	domain:KH 2	3	6.97674	0.00115825	FUBP1_HUMAN, FUBP2_HUMAN, HNRPK_HUMAN	43	23	19113	57.9767	0.218742	0.0403068	1.45684		Category	Term	Count	%	p-Value	Genes	List Total	Pop Hits	Pop Total	Fold Enrichment	Bonferroni	Benjamini	FDR
UP_SEQ_FEATURE	domain:KH 1	3	6.97674	0.00115825	FUBP1_HUMAN, FUBP2_HUMAN, HNRPK_HUMAN	43	23	19113	57.9767	0.218742	0.0403068	1.45684		GOTERM_CC_FAT	GO:0030863~cortical cytoskeleton	6	22.2222	3.36692e-08	ACTN4_HUMAN, MYH9_HUMAN, COF1_HUMAN, ACTB_HUMAN, MARE1_HUMAN, ACTG_HUMAN	26	49	12782	60.1978	4.84835e-06	2.42418e-06	3.99225e-05
INTERPRO	IPR004088:K Homology, type 1	3	6.97674	0.00297319	FUBP1_HUMAN, FUBP2_HUMAN, HNRPK_HUMAN	42	33	16659	36.0584	0.279304	0.10343	3.30823		GOTERM_CC_FAT	GO:0005938~cell cortex	7	25.9259	2.96677e-07	ACTN4_HUMAN, MYH9_HUMAN, COF1_HUMAN, ACTB_HUMAN, MARE1_HUMAN, FLNA_HUMAN, ACTG_HUMAN	26	146	12782	23.5706	4.27206e-05	1.42404e-05	0.000351778
INTERPRO	IPR018111:K Homology, type 1, subgroup	3	6.97674	0.00334007	FUBP1_HUMAN, FUBP2_HUMAN, HNRPK_HUMAN	42	35	16659	33.998	0.307898	0.0879	3.70946		GOTERM_CC_FAT	GO:0044448~cell cortex part	6	22.2222	4.90358e-07	ACTN4_HUMAN, MYH9_HUMAN, COF1_HUMAN, ACTB_HUMAN, MARE1_HUMAN, ACTG_HUMAN	26	83	12782	35.5385	7.06091e-05	1.41222e-05	0.00058143
INTERPRO	IPR004087:K Homology	3	6.97674	0.00372703	FUBP1_HUMAN, FUBP2_HUMAN, HNRPK_HUMAN	42	37	16659	32.1602	0.33684	0.0788642	4.13101		SP_PIR_KEYWORDS	deafness	3	11.1111	0.00801769	MYH9_HUMAN, ACTB_HUMAN, ACTG_HUMAN	27	100	19235	21.3722	0.597335	0.0961323	8.73494
SMART	SM00322:KH	3	6.97674	0.00387417	FUBP1_HUMAN, FUBP2_HUMAN, HNRPK_HUMAN	24	37	9079	30.6723	0.0602178	0.0305763	2.71888		KEGG_PATHWAY	hsa04530:Tight junction	4	14.8148	0.0127293	ACTN4_HUMAN, MYH9_HUMAN, ACTB_HUMAN, ACTG_HUMAN	20	134	5085	7.58955	0.344766	0.0810768	10.5796
														KEGG_PATHWAY	hsa05416:Viral myocarditis	3	11.1111	0.0282021	MYH9_HUMAN, ACTB_HUMAN, ACTG_HUMAN	20	71	5085	10.743	0.610949	0.126165	22.0966
Annotation Cluster 7	Enrichment Score: 2.409010976589756													SP_PIR_KEYWORDS	atp-binding	6	22.2222	0.0301853	ENPL_HUMAN, MYH9_HUMAN, ACTB_HUMAN, GRP78_HUMAN, EHD1_HUMAN, ACTG_HUMAN	27	1326	19235	3.22356	0.968679	0.27011	29.391
Category	Term	Count	%	PValue	Genes	List Total	Pop Hits	Pop Total	Fold Enrichment	Bonferroni	Benjamini	FDR		GOTERM_BP_FAT	GO:0032989~cellular component morphogenesis	4	14.8148	0.0395764	MYH9_HUMAN, COF1_HUMAN, ACTB_HUMAN, ACTG_HUMAN	27	397	13528	5.04823	1	0.418464	43.5377
GOTERM_BP_FAT	GO:0048255~mRNA stabilization	3	6.97674	0.000830439	HNRPU_HUMAN, DHX9_HUMAN, HNRPD_HUMAN	40	15	13528	67.64	0.326625	0.0324174	1.18106		SP_PIR_KEYWORDS	nucleotide-binding	6	22.2222	0.0719741	ENPL_HUMAN, MYH9_HUMAN, ACTB_HUMAN, GRP78_HUMAN, EHD1_HUMAN, ACTG_HUMAN	27	1686	19235	2.53526	0.999784	0.452778	57.1779
GOTERM_BP_FAT	GO:0043489~RNA stabilization	3	6.97674	0.000830439	HNRPU_HUMAN, DHX9_HUMAN, HNRPD_HUMAN	40	15	13528	67.64	0.326625	0.0324174	1.18106		GOTERM_MF_FAT	GO:0001882~nucleoside binding	7	25.9259	0.0807904	ACTN4_HUMAN, ENPL_HUMAN, MYH9_HUMAN, ACTB_HUMAN, GRP78_HUMAN, EHD1_HUMAN, ACTG_HUMAN	26	1612	12983	2.16838	0.999985	0.795778	62.6073
GOTERM_BP_FAT	GO:0043488~regulation of mRNA stability	3	6.97674	0.00180384	HNRPU_HUMAN, DHX9_HUMAN, HNRPD_HUMAN	40	22	13528	46.1182	0.576584	0.06397	2.54891		GOTERM_MF_FAT	GO:0005524~ATP binding	6	22.2222	0.147498	ENPL_HUMAN, MYH9_HUMAN, ACTB_HUMAN, GRP78_HUMAN, EHD1_HUMAN, ACTG_HUMAN	26	1477	12983	2.02849	1	0.87833	84.486
GOTERM_BP_FAT	GO:0043487~regulation of RNA stability	3	6.97674	0.00214741	HNRPU_HUMAN, DHX9_HUMAN, HNRPD_HUMAN	40	24	13528	42.275	0.64058	0.0704831	3.02749		GOTERM_MF_FAT	GO:0032559~adenyl ribonucleotide binding	6	22.2222	0.153682	ENPL_HUMAN, MYH9_HUMAN, ACTB_HUMAN, GRP78_HUMAN, EHD1_HUMAN, ACTG_HUMAN	26	1497	12983	2.00139	1	0.864978	85.7505
GOTERM_BP_FAT	GO:0010608~posttranscriptional regulation of gene expression	5	11.6279	0.00308566	RBM8A_HUMAN, HNRPU_HUMAN, SRP14_HUMAN, DHX9_HUMAN, HNRPD_HUMAN	40	211	13528	8.01422	0.770314	0.0934142	4.32332		GOTERM_MF_FAT	GO:0030554~adenyl nucleotide binding	6	22.2222	0.179555	ENPL_HUMAN, MYH9_HUMAN, ACTB_HUMAN, GRP78_HUMAN, EHD1_HUMAN, ACTG_HUMAN	26	1577	12983	1.89986	1	0.886618	90.0838
GOTERM_BP_FAT	GO:0051252~regulation of RNA metabolic process	7	16.2791	0.426442	RS14_HUMAN, NPM_HUMAN, HNRPU_HUMAN, ILF3_HUMAN, DHX9_HUMAN, HNRPD_HUMAN, RS13_HUMAN	40	1813	13528	1.30579	1	0.994419	99.9647		GOTERM_MF_FAT	GO:0001883~purine nucleoside binding	6	22.2222	0.187653	ENPL_HUMAN, MYH9_HUMAN, ACTB_HUMAN, GRP78_HUMAN, EHD1_HUMAN, ACTG_HUMAN	26	1601	12983	1.87138	1	0.878792	91.1684
														GOTERM_MF_FAT	GO:0000166~nucleotide binding	7	25.9259	0.255214	ENPL_HUMAN, MYH9_HUMAN, ACTB_HUMAN, LDHB_HUMAN, GRP78_HUMAN, EHD1_HUMAN, ACTG_HUMAN	26	2245	12983	1.55698	1	0.93785	96.796
Annotation Cluster 8	Enrichment Score: 2.3249056441442284													GOTERM_MF_FAT	GO:0032553~ribonucleotide binding	6	22.2222	0.273739	ENPL_HUMAN, MYH9_HUMAN, ACTB_HUMAN, GRP78_HUMAN, EHD1_HUMAN, ACTG_HUMAN	26	1836	12983	1.63185	1	0.928548	97.6124
Category	Term	Count	%	PValue	Genes	List Total	Pop Hits	Pop Total	Fold Enrichment	Bonferroni	Benjamini	FDR		GOTERM_MF_FAT	GO:0032555~purine ribonucleotide binding	6	22.2222	0.273739	ENPL_HUMAN, MYH9_HUMAN, ACTB_HUMAN, GRP78_HUMAN, EHD1_HUMAN, ACTG_HUMAN	26	1836	12983	1.63185	1	0.928548	97.6124
KEGG_PATHWAY	hsa03040:Spliceosome	6	13.9535	2.12333e-05	RBM8A_HUMAN, HNRPU_HUMAN, ROA1_HUMAN, HNRPM_HUMAN, HNRPK_HUMAN, HNRPC_HUMAN	16	126	5085	15.1339	0.00025477	0.00025477	0.01366		GOTERM_MF_FAT	GO:0017076~purine nucleotide binding	6	22.2222	0.306022	ENPL_HUMAN, MYH9_HUMAN, ACTB_HUMAN, GRP78_HUMAN, EHD1_HUMAN, ACTG_HUMAN	26	1918	12983	1.56208	1	0.931367	98.596
SP_PIR_KEYWORDS	ubl conjugation	6	13.9535	0.00877808	NPM_HUMAN, FUBP1_HUMAN, ROA1_HUMAN, HNRPM_HUMAN, HNRPK_HUMAN, HNRPC_HUMAN	43	588	19235	4.56455	0.679339	0.0647152	9.74536
UP_SEQ_FEATURE	cross-link:Glycyl lysine isopeptide (Lys-Gly) (interchain with G-Cter in SUMO)	3	6.97674	0.0163604	NPM_HUMAN, ROA1_HUMAN, HNRPC_HUMAN	43	89	19113	14.9828	0.97021	0.273428	18.8514		Annotation Cluster 9	Enrichment Score: 1.2839775563837548
SP_PIR_KEYWORDS	host-virus interaction	4	9.30233	0.0241533	NPM_HUMAN, VIME_HUMAN, ROA1_HUMAN, HNRPK_HUMAN	43	285	19235	6.27825	0.95732	0.118527	24.7487		Category	Term	Count	%	p-Value	Genes	List Total	Pop Hits	Pop Total	Fold Enrichment	Bonferroni	Benjamini	FDR
SP_PIR_KEYWORDS	isopeptide bond	4	9.30233	0.0322318	NPM_HUMAN, ROA1_HUMAN, HNRPK_HUMAN, HNRPC_HUMAN	43	319	19235	5.6091	0.985395	0.144897	31.6831		UP_SEQ_FEATURE	short sequence motif:Prevents secretion from ER	3	11.1111	0.00290291	ENPL_HUMAN, PDIA3_HUMAN, GRP78_HUMAN	27	59	19113	35.9944	0.34205	0.34205	3.38833
														GOTERM_CC_FAT	GO:0016023~cytoplasmic membrane-bounded vesicle	6	22.2222	0.00376153	ACTN4_HUMAN, ENPL_HUMAN, CXCL7_HUMAN, PDIA3_HUMAN, GRP78_HUMAN, EHD1_HUMAN	26	550	12782	5.36308	0.418812	0.0528219	4.37019
Annotation Cluster 9	Enrichment Score: 1.6809437696985596													GOTERM_CC_FAT	GO:0031988~membrane-bounded vesicle	6	22.2222	0.00431715	ACTN4_HUMAN, ENPL_HUMAN, CXCL7_HUMAN, PDIA3_HUMAN, GRP78_HUMAN, EHD1_HUMAN	26	568	12782	5.19312	0.463675	0.0550637	5.00069
Category	Term	Count	%	PValue	Genes	List Total	Pop Hits	Pop Total	Fold Enrichment	Bonferroni	Benjamini	FDR		GOTERM_CC_FAT	GO:0031410~cytoplasmic vesicle	6	22.2222	0.00723503	ACTN4_HUMAN, ENPL_HUMAN, CXCL7_HUMAN, PDIA3_HUMAN, GRP78_HUMAN, EHD1_HUMAN	26	642	12782	4.59454	0.64853	0.0834475	8.24972
UP_SEQ_FEATURE	repeat:3	4	9.30233	0.0115274	SFPQ_HUMAN, NUCL_HUMAN, HNRPM_HUMAN, FUBP2_HUMAN	43	214	19113	8.30819	0.915381	0.239972	13.6551		GOTERM_CC_FAT	GO:0031982~vesicle	6	22.2222	0.0086357	ACTN4_HUMAN, ENPL_HUMAN, CXCL7_HUMAN, PDIA3_HUMAN, GRP78_HUMAN, EHD1_HUMAN	26	670	12782	4.40253	0.713192	0.0916018	9.77293
UP_SEQ_FEATURE	repeat:1	4	9.30233	0.0161822	SFPQ_HUMAN, NUCL_HUMAN, HNRPM_HUMAN, FUBP2_HUMAN	43	243	19113	7.31668	0.969038	0.293548	18.6649		GOTERM_CC_FAT	GO:0005788~endoplasmic reticulum lumen	3	11.1111	0.0105719	ENPL_HUMAN, PDIA3_HUMAN, GRP78_HUMAN	26	80	12782	18.4356	0.783564	0.0969981	11.8404
UP_SEQ_FEATURE	repeat:2	4	9.30233	0.0167157	SFPQ_HUMAN, NUCL_HUMAN, HNRPM_HUMAN, FUBP2_HUMAN	43	246	19113	7.22745	0.972417	0.258598	19.2218		GOTERM_CC_FAT	GO:0042470~melanosome	3	11.1111	0.0129614	ENPL_HUMAN, PDIA3_HUMAN, GRP78_HUMAN	26	89	12782	16.5713	0.847203	0.110784	14.3321
UP_SEQ_FEATURE	repeat:4	3	6.97674	0.0605804	NUCL_HUMAN, HNRPM_HUMAN, FUBP2_HUMAN	43	182	19113	7.32673	0.999998	0.588276	54.6771		GOTERM_CC_FAT	GO:0048770~pigment granule	3	11.1111	0.0129614	ENPL_HUMAN, PDIA3_HUMAN, GRP78_HUMAN	26	89	12782	16.5713	0.847203	0.110784	14.3321
														GOTERM_BP_FAT	GO:0042981~regulation of apoptosis	6	22.2222	0.0169748	ACTN4_HUMAN, ENPL_HUMAN, PRDX5_HUMAN, COF1_HUMAN, PDIA3_HUMAN, GRP78_HUMAN	27	804	13528	3.73908	0.999492	0.253013	21.5214
Annotation Cluster 10	Enrichment Score: 1.139280240867917													GOTERM_BP_FAT	GO:0043067~regulation of programmed cell death	6	22.2222	0.0176517	ACTN4_HUMAN, ENPL_HUMAN, PRDX5_HUMAN, COF1_HUMAN, PDIA3_HUMAN, GRP78_HUMAN	27	812	13528	3.70224	0.999625	0.253385	22.2829
Category	Term	Count	%	PValue	Genes	List Total	Pop Hits	Pop Total	Fold Enrichment	Bonferroni	Benjamini	FDR		GOTERM_BP_FAT	GO:0010941~regulation of cell death	6	22.2222	0.0179102	ACTN4_HUMAN, ENPL_HUMAN, PRDX5_HUMAN, COF1_HUMAN, PDIA3_HUMAN, GRP78_HUMAN	27	815	13528	3.68862	0.999667	0.248688	22.5719
GOTERM_BP_FAT	GO:0045934~negative regulation of nucleobase, nucleoside, nucleotide and nucleic acid metabolic process	7	16.2791	0.00321661	RS14_HUMAN, NPM_HUMAN, BCLF1_HUMAN, ILF3_HUMAN, ATIF1_HUMAN, PHB_HUMAN, RS13_HUMAN	40	512	13528	4.62383	0.784237	0.0913982	4.50289		GOTERM_BP_FAT	GO:0043066~negative regulation of apoptosis	4	14.8148	0.029594	ENPL_HUMAN, PRDX5_HUMAN, COF1_HUMAN, GRP78_HUMAN	27	354	13528	5.66144	0.999998	0.36802	34.6382
GOTERM_BP_FAT	GO:0051172~negative regulation of nitrogen compound metabolic process	7	16.2791	0.00343989	RS14_HUMAN, NPM_HUMAN, BCLF1_HUMAN, ILF3_HUMAN, ATIF1_HUMAN, PHB_HUMAN, RS13_HUMAN	40	519	13528	4.56146	0.80606	0.0919745	4.80834		GOTERM_BP_FAT	GO:0043069~negative regulation of programmed cell death	4	14.8148	0.0306754	ENPL_HUMAN, PRDX5_HUMAN, COF1_HUMAN, GRP78_HUMAN	27	359	13528	5.58259	0.999999	0.35932	35.6617
GOTERM_BP_FAT	GO:0010605~negative regulation of macromolecule metabolic process	8	18.6047	0.00451992	RS14_HUMAN, NPM_HUMAN, BCLF1_HUMAN, SRP14_HUMAN, ILF3_HUMAN, PEBP1_HUMAN, PHB_HUMAN, RS13_HUMAN	40	734	13528	3.6861	0.884254	0.1129	6.2731		GOTERM_BP_FAT	GO:0060548~negative regulation of cell death	4	14.8148	0.0308942	ENPL_HUMAN, PRDX5_HUMAN, COF1_HUMAN, GRP78_HUMAN	27	360	13528	5.56708	0.999999	0.352371	35.867
GOTERM_BP_FAT	GO:0010558~negative regulation of macromolecule biosynthetic process	5	11.6279	0.071389	RS14_HUMAN, BCLF1_HUMAN, SRP14_HUMAN, ILF3_HUMAN, PHB_HUMAN	40	547	13528	3.09141	1	0.784077	65.3265		GOTERM_BP_FAT	GO:0006916~anti-apoptosis	3	11.1111	0.059053	ENPL_HUMAN, COF1_HUMAN, GRP78_HUMAN	27	206	13528	7.29666	1	0.52717	57.7516
GOTERM_BP_FAT	GO:0031327~negative regulation of cellular biosynthetic process	5	11.6279	0.0767976	RS14_HUMAN, BCLF1_HUMAN, SRP14_HUMAN, ILF3_HUMAN, PHB_HUMAN	40	561	13528	3.01426	1	0.795015	68.1053		SP_PIR_KEYWORDS	calcium	4	14.8148	0.0925812	ACTN4_HUMAN, ENPL_HUMAN, EHD1_HUMAN, TPM4_HUMAN	27	803	19235	3.54873	0.999983	0.518992	66.8154
GOTERM_BP_FAT	GO:0009890~negative regulation of biosynthetic process	5	11.6279	0.0815969	RS14_HUMAN, BCLF1_HUMAN, SRP14_HUMAN, ILF3_HUMAN, PHB_HUMAN	40	573	13528	2.95113	1	0.789513	70.3962		GOTERM_MF_FAT	GO:0005509~calcium ion binding	5	18.5185	0.0964101	ACTN4_HUMAN, ENPL_HUMAN, GRP78_HUMAN, EHD1_HUMAN, TPM4_HUMAN	26	919	12983	2.71679	0.999998	0.812273	69.3894
GOTERM_BP_FAT	GO:0051253~negative regulation of RNA metabolic process	4	9.30233	0.0857093	RS14_HUMAN, NPM_HUMAN, ILF3_HUMAN, RS13_HUMAN	40	362	13528	3.73702	1	0.770255	72.2365		GOTERM_CC_FAT	GO:0048471~perinuclear region of cytoplasm	3	11.1111	0.108195	ACTN4_HUMAN, ENPL_HUMAN, GRP78_HUMAN	26	288	12782	5.12099	1	0.599909	74.2762
GOTERM_MF_FAT	GO:0016563~transcription activator activity	4	9.30233	0.131515	NPM_HUMAN, ILF3_HUMAN, PHB_HUMAN, HNRPD_HUMAN	41	410	12983	3.08935	1	0.798573	80.4187		GOTERM_CC_FAT	GO:0043233~organelle lumen	7	25.9259	0.134501	ACTN4_HUMAN, ENPL_HUMAN, COF1_HUMAN, ACTB_HUMAN, CXCL7_HUMAN, PDIA3_HUMAN, GRP78_HUMAN	26	1820	12782	1.89083	1	0.665384	81.9635
GOTERM_BP_FAT	GO:0016481~negative regulation of transcription	4	9.30233	0.145259	RS14_HUMAN, BCLF1_HUMAN, ILF3_HUMAN, PHB_HUMAN	40	459	13528	2.94728	1	0.888907	89.403		GOTERM_CC_FAT	GO:0031974~membrane-enclosed lumen	7	25.9259	0.144136	ACTN4_HUMAN, ENPL_HUMAN, COF1_HUMAN, ACTB_HUMAN, CXCL7_HUMAN, PDIA3_HUMAN, GRP78_HUMAN	26	1856	12782	1.85415	1	0.673927	84.2055
GOTERM_BP_FAT	GO:0010629~negative regulation of gene expression	4	9.30233	0.17661	RS14_HUMAN, BCLF1_HUMAN, ILF3_HUMAN, PHB_HUMAN	40	504	13528	2.68413	1	0.92342	93.79		GOTERM_CC_FAT	GO:0044432~endoplasmic reticulum part	3	11.1111	0.146749	ENPL_HUMAN, PDIA3_HUMAN, GRP78_HUMAN	26	347	12782	4.25028	1	0.66319	84.7679
GOTERM_MF_FAT	GO:0016564~transcription repressor activity	3	6.97674	0.254354	BCLF1_HUMAN, ILF3_HUMAN, PHB_HUMAN	41	316	12983	3.00625	1	0.940523	96.643		GOTERM_BP_FAT	GO:0015031~protein transport	4	14.8148	0.178162	ACTN4_HUMAN, ENPL_HUMAN, MYH9_HUMAN, PDIA3_HUMAN	27	762	13528	2.63012	1	0.867535	93.7801
GOTERM_BP_FAT	GO:0008285~negative regulation of cell proliferation	3	6.97674	0.279411	NPM_HUMAN, ATIF1_HUMAN, PHB_HUMAN	40	361	13528	2.81053	1	0.975615	99.0778		GOTERM_BP_FAT	GO:0019725~cellular homeostasis	3	11.1111	0.22515	ENPL_HUMAN, PRDX5_HUMAN, PDIA3_HUMAN	27	466	13528	3.22556	1	0.92333	97.2969
GOTERM_BP_FAT	GO:0045449~regulation of transcription	9	20.9302	0.482892	RS14_HUMAN, NPM_HUMAN, BCLF1_HUMAN, SFPQ_HUMAN, ILF3_HUMAN, FUBP1_HUMAN, FUBP2_HUMAN, PHB_HUMAN, HNRPD_HUMAN	40	2601	13528	1.17024	1	0.997323	99.992		SP_PIR_KEYWORDS	endoplasmic reticulum	3	11.1111	0.250596	ENPL_HUMAN, PDIA3_HUMAN, GRP78_HUMAN	27	713	19235	2.99751	1	0.853029	96.22
GOTERM_MF_FAT	GO:0030528~transcription regulator activity	6	13.9535	0.505427	NPM_HUMAN, BCLF1_HUMAN, ILF3_HUMAN, FUBP1_HUMAN, PHB_HUMAN, HNRPD_HUMAN	41	1512	12983	1.25658	1	0.990264	99.9709		GOTERM_CC_FAT	GO:0070013~intracellular organelle lumen	6	22.2222	0.262538	ACTN4_HUMAN, ENPL_HUMAN, COF1_HUMAN, ACTB_HUMAN, PDIA3_HUMAN, GRP78_HUMAN	26	1779	12782	1.65806	1	0.839143	97.2976
														GOTERM_BP_FAT	GO:0042592~homeostatic process	3	11.1111	0.427478	ENPL_HUMAN, PRDX5_HUMAN, PDIA3_HUMAN	27	751	13528	2.00148	1	0.995873	99.9627
Annotation Cluster 11	Enrichment Score: 1.1326811123251161													GOTERM_CC_FAT	GO:0005783~endoplasmic reticulum	3	11.1111	0.569944	ENPL_HUMAN, PDIA3_HUMAN, GRP78_HUMAN	26	960	12782	1.5363	1	0.990661	99.9955
Category	Term	Count	%	PValue	Genes	List Total	Pop Hits	Pop Total	Fold Enrichment	Bonferroni	Benjamini	FDR		SP_PIR_KEYWORDS	signal	4	14.8148	0.839837	ENPL_HUMAN, CXCL7_HUMAN, PDIA3_HUMAN, GRP78_HUMAN	27	3250	19235	0.876809	1	0.99982	100
GOTERM_BP_FAT	GO:0051259~protein oligomerization	4	9.30233	0.0136151	NPM_HUMAN, ANXA5_HUMAN, ATIF1_HUMAN, PEBP1_HUMAN	40	174	13528	7.77471	0.998534	0.290671	17.8024		UP_SEQ_FEATURE	signal peptide	4	14.8148	0.843211	ENPL_HUMAN, CXCL7_HUMAN, PDIA3_HUMAN, GRP78_HUMAN	27	3250	19113	0.871248	1	1	100
GOTERM_BP_FAT	GO:0051260~protein homooligomerization	3	6.97674	0.0305571	ANXA5_HUMAN, ATIF1_HUMAN, PEBP1_HUMAN	40	95	13528	10.68	1	0.505116	35.8411
GOTERM_MF_FAT	GO:0004857~enzyme inhibitor activity	4	9.30233	0.0499816	FETUA_HUMAN, ANXA5_HUMAN, ATIF1_HUMAN, PEBP1_HUMAN	41	270	12983	4.69124	0.998354	0.55119	44.7299		Annotation Cluster 10	Enrichment Score: 1.1384792469804856
GOTERM_BP_FAT	GO:0065003~macromolecular complex assembly	5	11.6279	0.123158	RS14_HUMAN, NPM_HUMAN, ANXA5_HUMAN, ATIF1_HUMAN, PEBP1_HUMAN	40	665	13528	2.54286	1	0.849794	84.7337		Category	Term	Count	%	p-Value	Genes	List Total	Pop Hits	Pop Total	Fold Enrichment	Bonferroni	Benjamini	FDR
GOTERM_BP_FAT	GO:0043933~macromolecular complex subunit organization	5	11.6279	0.146309	RS14_HUMAN, NPM_HUMAN, ANXA5_HUMAN, ATIF1_HUMAN, PEBP1_HUMAN	40	710	13528	2.38169	1	0.883671	89.5877		UP_SEQ_FEATURE	cross-link:Glycyl lysine isopeptide (Lys-Gly) (interchain with G-Cter in ubiquitin)	3	11.1111	0.0297566	H2B1C_HUMAN, ACTN4_HUMAN, PROF1_HUMAN	27	199	19113	10.6717	0.987093	0.886392	30.1059
GOTERM_BP_FAT	GO:0006461~protein complex assembly	4	9.30233	0.177329	NPM_HUMAN, ANXA5_HUMAN, ATIF1_HUMAN, PEBP1_HUMAN	40	505	13528	2.67881	1	0.918829	93.867		SP_PIR_KEYWORDS	isopeptide bond	3	11.1111	0.0686444	H2B1C_HUMAN, ACTN4_HUMAN, PROF1_HUMAN	27	319	19235	6.69976	0.999676	0.461057	55.4007
GOTERM_BP_FAT	GO:0070271~protein complex biogenesis	4	9.30233	0.177329	NPM_HUMAN, ANXA5_HUMAN, ATIF1_HUMAN, PEBP1_HUMAN	40	505	13528	2.67881	1	0.918829	93.867		SP_PIR_KEYWORDS	ubl conjugation	3	11.1111	0.188093	H2B1C_HUMAN, ACTN4_HUMAN, PROF1_HUMAN	27	588	19235	3.63473	1	0.770445	90.6134
Annotation Cluster 12	Enrichment Score: 0.8386348204421992													Annotation Cluster 11	Enrichment Score: 0.7886348688762135
Category	Term	Count	%	PValue	Genes	List Total	Pop Hits	Pop Total	Fold Enrichment	Bonferroni	Benjamini	FDR		Category	Term	Count	%	p-Value	Genes	List Total	Pop Hits	Pop Total	Fold Enrichment	Bonferroni	Benjamini	FDR
GOTERM_BP_FAT	GO:0042981~regulation of apoptosis	6	13.9535	0.0793974	NPM_HUMAN, BCLF1_HUMAN, TXND5_HUMAN, CH10_HUMAN, ANXA5_HUMAN, PHB_HUMAN	40	804	13528	2.52388	1	0.793017	69.366		INTERPRO	IPR012335:Thioredoxin fold	3	11.1111	0.0107589	CLIC1_HUMAN, PRDX5_HUMAN, PDIA3_HUMAN	27	101	16659	18.3267	0.613999	0.37871	11.0564
GOTERM_BP_FAT	GO:0043067~regulation of programmed cell death	6	13.9535	0.0820651	NPM_HUMAN, BCLF1_HUMAN, TXND5_HUMAN, CH10_HUMAN, ANXA5_HUMAN, PHB_HUMAN	40	812	13528	2.49901	1	0.779003	70.6113		GOTERM_BP_FAT	GO:0006952~defense response	4	14.8148	0.112281	H2B1C_HUMAN, CLIC1_HUMAN, PRDX5_HUMAN, CXCL7_HUMAN	27	615	13528	3.25878	1	0.75054	81.4719
GOTERM_BP_FAT	GO:0010941~regulation of cell death	6	13.9535	0.0830781	NPM_HUMAN, BCLF1_HUMAN, TXND5_HUMAN, CH10_HUMAN, ANXA5_HUMAN, PHB_HUMAN	40	815	13528	2.48982	1	0.771098	71.0717		UP_SEQ_FEATURE	mutagenesis site	5	18.5185	0.300903	CLIC1_HUMAN, PRDX5_HUMAN, TYB4_HUMAN, PDIA3_HUMAN, MARE1_HUMAN	27	2045	19113	1.73078	1	1	98.5657
GOTERM_BP_FAT	GO:0006916~anti-apoptosis	3	6.97674	0.118654	NPM_HUMAN, TXND5_HUMAN, ANXA5_HUMAN	40	206	13528	4.92524	1	0.847224	83.5732		UP_SEQ_FEATURE	disulfide bond	5	18.5185	0.547307	ENPL_HUMAN, CLIC1_HUMAN, PRDX5_HUMAN, CXCL7_HUMAN, PDIA3_HUMAN	27	2819	19113	1.25557	1	1	99.9917
GOTERM_BP_FAT	GO:0043066~negative regulation of apoptosis	3	6.97674	0.271877	NPM_HUMAN, TXND5_HUMAN, ANXA5_HUMAN	40	354	13528	2.8661	1	0.98121	98.9299		SP_PIR_KEYWORDS	disulfide bond	5	18.5185	0.572919	ENPL_HUMAN, CLIC1_HUMAN, PRDX5_HUMAN, CXCL7_HUMAN, PDIA3_HUMAN	27	2924	19235	1.21821	1	0.991827	99.9936
GOTERM_BP_FAT	GO:0043069~negative regulation of programmed cell death	3	6.97674	0.277258	NPM_HUMAN, TXND5_HUMAN, ANXA5_HUMAN	40	359	13528	2.82618	1	0.979015	99.0376
GOTERM_BP_FAT	GO:0060548~negative regulation of cell death	3	6.97674	0.278334	NPM_HUMAN, TXND5_HUMAN, ANXA5_HUMAN	40	360	13528	2.81833	1	0.977337	99.0579		Annotation Cluster 12	Enrichment Score: 0.43978656545833683
														Category	Term	Count	%	p-Value	Genes	List Total	Pop Hits	Pop Total	Fold Enrichment	Bonferroni	Benjamini	FDR
Annotation Cluster 13	Enrichment Score: 0.7760695446860899													SP_PIR_KEYWORDS	calcium	4	14.8148	0.0925812	ACTN4_HUMAN, ENPL_HUMAN, EHD1_HUMAN, TPM4_HUMAN	27	803	19235	3.54873	0.999983	0.518992	66.8154
Category	Term	Count	%	PValue	Genes	List Total	Pop Hits	Pop Total	Fold Enrichment	Bonferroni	Benjamini	FDR		GOTERM_MF_FAT	GO:0005509~calcium ion binding	5	18.5185	0.0964101	ACTN4_HUMAN, ENPL_HUMAN, GRP78_HUMAN, EHD1_HUMAN, TPM4_HUMAN	26	919	12983	2.71679	0.999998	0.812273	69.3894
GOTERM_CC_FAT	GO:0042995~cell projection	6	13.9535	0.053887	VIME_HUMAN, S10A4_HUMAN, MOES_HUMAN, S10A6_HUMAN, PEBP1_HUMAN, EZRI_HUMAN	39	697	12782	2.82132	0.998772	0.310898	47.1035		GOTERM_MF_FAT	GO:0043167~ion binding	9	33.3333	0.602678	PGM2_HUMAN, ACTN4_HUMAN, ENPL_HUMAN, CLIC1_HUMAN, HBB_HUMAN, GRP78_HUMAN, HBA_HUMAN, EHD1_HUMAN, TPM4_HUMAN	26	4241	12983	1.05968	1	0.998359	99.9979
GOTERM_BP_FAT	GO:0000902~cell morphogenesis	3	6.97674	0.274029	S10A4_HUMAN, S10A6_HUMAN, EZRI_HUMAN	40	356	13528	2.85	1	0.979932	98.9743		GOTERM_MF_FAT	GO:0046872~metal ion binding	8	29.6296	0.730636	PGM2_HUMAN, ACTN4_HUMAN, ENPL_HUMAN, HBB_HUMAN, GRP78_HUMAN, HBA_HUMAN, EHD1_HUMAN, TPM4_HUMAN	26	4140	12983	0.96492	1	0.999826	100
GOTERM_BP_FAT	GO:0032989~cellular component morphogenesis	3	6.97674	0.318061	S10A4_HUMAN, S10A6_HUMAN, EZRI_HUMAN	40	397	13528	2.55567	1	0.984099	99.5808		GOTERM_MF_FAT	GO:0043169~cation binding	8	29.6296	0.741098	PGM2_HUMAN, ACTN4_HUMAN, ENPL_HUMAN, HBB_HUMAN, GRP78_HUMAN, HBA_HUMAN, EHD1_HUMAN, TPM4_HUMAN	26	4179	12983	0.955915	1	0.999795	100
														SP_PIR_KEYWORDS	metal-binding	4	14.8148	0.78881	PGM2_HUMAN, HBB_HUMAN, HBA_HUMAN, TPM4_HUMAN	27	2972	19235	0.958826	1	0.99966	100
Annotation Cluster 14	Enrichment Score: 0.701669123031843
Category	Term	Count	%	PValue	Genes	List Total	Pop Hits	Pop Total	Fold Enrichment	Bonferroni	Benjamini	FDR		Annotation Cluster 13	Enrichment Score: 0.06346035693901467
GOTERM_MF_FAT	GO:0004857~enzyme inhibitor activity	4	9.30233	0.0499816	FETUA_HUMAN, ANXA5_HUMAN, ATIF1_HUMAN, PEBP1_HUMAN	41	270	12983	4.69124	0.998354	0.55119	44.7299		Category	Term	Count	%	p-Value	Genes	List Total	Pop Hits	Pop Total	Fold Enrichment	Bonferroni	Benjamini	FDR
GOTERM_BP_FAT	GO:0010033~response to organic substance	4	9.30233	0.345116	FETUA_HUMAN, CH10_HUMAN, ANXA5_HUMAN, PEBP1_HUMAN	40	721	13528	1.87628	1	0.988639	99.765		GOTERM_CC_FAT	GO:0005886~plasma membrane	7	25.9259	0.793187	CLIC1_HUMAN, TAGL2_HUMAN, MYH9_HUMAN, EHD1_HUMAN, MARE1_HUMAN, TLN1_HUMAN, FLNA_HUMAN	26	3777	12782	0.911122	1	0.999601	100
GOTERM_BP_FAT	GO:0009611~response to wounding	3	6.97674	0.455216	FETUA_HUMAN, ANXA5_HUMAN, PEBP1_HUMAN	40	530	13528	1.91434	1	0.99615	99.9831		SP_PIR_KEYWORDS	cell membrane	3	11.1111	0.813682	CLIC1_HUMAN, EHD1_HUMAN, TLN1_HUMAN	27	2194	19235	0.974121	1	0.99974	100
														SP_PIR_KEYWORDS	membrane	3	11.1111	0.999514	CLIC1_HUMAN, EHD1_HUMAN, TLN1_HUMAN	27	6256	19235	0.341628	1	1	100
Annotation Cluster 15	Enrichment Score: 0.6505781851635242
Category	Term	Count	%	PValue	Genes	List Total	Pop Hits	Pop Total	Fold Enrichment	Bonferroni	Benjamini	FDR
GOTERM_CC_FAT	GO:0044429~mitochondrial part	5	11.6279	0.0987816	CH10_HUMAN, ATIF1_HUMAN, PEBP1_HUMAN, PHB_HUMAN, ACADM_HUMAN	39	595	12782	2.75415	0.999997	0.467007	69.7517
GOTERM_CC_FAT	GO:0031967~organelle envelope	5	11.6279	0.110622	MATR3_HUMAN, S10A6_HUMAN, ATIF1_HUMAN, PEBP1_HUMAN, PHB_HUMAN	39	620	12782	2.64309	0.999999	0.475223	74.0183
GOTERM_CC_FAT	GO:0031975~envelope	5	11.6279	0.111597	MATR3_HUMAN, S10A6_HUMAN, ATIF1_HUMAN, PEBP1_HUMAN, PHB_HUMAN	39	622	12782	2.63459	0.999999	0.463408	74.3438
GOTERM_CC_FAT	GO:0005739~mitochondrion	6	13.9535	0.2184	ILF3_HUMAN, CH10_HUMAN, ATIF1_HUMAN, PEBP1_HUMAN, PHB_HUMAN, ACADM_HUMAN	39	1087	12782	1.80907	1	0.69658	94.1158
GOTERM_CC_FAT	GO:0019866~organelle inner membrane	3	6.97674	0.256029	MATR3_HUMAN, ATIF1_HUMAN, PHB_HUMAN	39	329	12782	2.98854	1	0.734307	96.6632
SP_PIR_KEYWORDS	mitochondrion	4	9.30233	0.272636	CH10_HUMAN, ATIF1_HUMAN, PHB_HUMAN, ACADM_HUMAN	43	832	19235	2.1506	1	0.769288	97.5326
GOTERM_CC_FAT	GO:0031966~mitochondrial membrane	3	6.97674	0.328021	ATIF1_HUMAN, PEBP1_HUMAN, PHB_HUMAN	39	394	12782	2.49551	1	0.798782	98.9644
GOTERM_CC_FAT	GO:0005740~mitochondrial envelope	3	6.97674	0.355376	ATIF1_HUMAN, PEBP1_HUMAN, PHB_HUMAN	39	419	12782	2.34661	1	0.819831	99.3578
GOTERM_CC_FAT	GO:0031090~organelle membrane	4	9.30233	0.644036	MATR3_HUMAN, ATIF1_HUMAN, PEBP1_HUMAN, PHB_HUMAN	39	1096	12782	1.19614	1	0.974676	99.9993
Annotation Cluster 16	Enrichment Score: 0.5999824616029892
Category	Term	Count	%	PValue	Genes	List Total	Pop Hits	Pop Total	Fold Enrichment	Bonferroni	Benjamini	FDR
SP_PIR_KEYWORDS	dna-binding	10	23.2558	0.0176151	BCLF1_HUMAN, SFPQ_HUMAN, HNRPU_HUMAN, NUCL_HUMAN, ILF3_HUMAN, FUBP1_HUMAN, DHX9_HUMAN, FUBP2_HUMAN, HNRPK_HUMAN, HNRPD_HUMAN	43	1868	19235	2.39468	0.898996	0.098963	18.672
GOTERM_MF_FAT	GO:0003677~DNA binding	12	27.907	0.0899952	BCLF1_HUMAN, SFPQ_HUMAN, HNRPU_HUMAN, ROA2_HUMAN, NUCL_HUMAN, ILF3_HUMAN, FUBP1_HUMAN, ROA1_HUMAN, DHX9_HUMAN, FUBP2_HUMAN, HNRPK_HUMAN, HNRPD_HUMAN	41	2331	12983	1.63016	0.999992	0.692358	66.3971
SP_PIR_KEYWORDS	transcription regulation	6	13.9535	0.4579	BCLF1_HUMAN, SFPQ_HUMAN, ILF3_HUMAN, FUBP1_HUMAN, FUBP2_HUMAN, HNRPD_HUMAN	43	2026	19235	1.32475	1	0.934369	99.9192
SP_PIR_KEYWORDS	Transcription	6	13.9535	0.477768	BCLF1_HUMAN, SFPQ_HUMAN, ILF3_HUMAN, FUBP1_HUMAN, FUBP2_HUMAN, HNRPD_HUMAN	43	2071	19235	1.29597	1	0.938791	99.9477
GOTERM_BP_FAT	GO:0045449~regulation of transcription	9	20.9302	0.482892	RS14_HUMAN, NPM_HUMAN, BCLF1_HUMAN, SFPQ_HUMAN, ILF3_HUMAN, FUBP1_HUMAN, FUBP2_HUMAN, PHB_HUMAN, HNRPD_HUMAN	40	2601	13528	1.17024	1	0.997323	99.992
GOTERM_MF_FAT	GO:0030528~transcription regulator activity	6	13.9535	0.505427	NPM_HUMAN, BCLF1_HUMAN, ILF3_HUMAN, FUBP1_HUMAN, PHB_HUMAN, HNRPD_HUMAN	41	1512	12983	1.25658	1	0.990264	99.9709
GOTERM_BP_FAT	GO:0006350~transcription	6	13.9535	0.745628	BCLF1_HUMAN, SFPQ_HUMAN, ILF3_HUMAN, FUBP1_HUMAN, FUBP2_HUMAN, HNRPD_HUMAN	40	2101	13528	0.965826	1	0.999989	100
Annotation Cluster 17	Enrichment Score: 0.5341960691486303
Category	Term	Count	%	PValue	Genes	List Total	Pop Hits	Pop Total	Fold Enrichment	Bonferroni	Benjamini	FDR
GOTERM_MF_FAT	GO:0042802~identical protein binding	5	11.6279	0.132813	NPM_HUMAN, S10A4_HUMAN, S10A6_HUMAN, ATIF1_HUMAN, HNRPC_HUMAN	41	640	12983	2.47389	1	0.773358	80.7546
GOTERM_MF_FAT	GO:0042803~protein homodimerization activity	3	6.97674	0.275044	NPM_HUMAN, S10A6_HUMAN, ATIF1_HUMAN	41	334	12983	2.84424	1	0.931462	97.5755
GOTERM_BP_FAT	GO:0042127~regulation of cell proliferation	4	9.30233	0.397873	NPM_HUMAN, S10A6_HUMAN, ATIF1_HUMAN, PHB_HUMAN	40	787	13528	1.71893	1	0.993465	99.9293
GOTERM_MF_FAT	GO:0046983~protein dimerization activity	3	6.97674	0.502144	NPM_HUMAN, S10A6_HUMAN, ATIF1_HUMAN	41	542	12983	1.75272	1	0.99212	99.9686
Annotation Cluster 18	Enrichment Score: 0.5135455259954975
Category	Term	Count	%	PValue	Genes	List Total	Pop Hits	Pop Total	Fold Enrichment	Bonferroni	Benjamini	FDR
GOTERM_CC_FAT	GO:0042995~cell projection	6	13.9535	0.053887	VIME_HUMAN, S10A4_HUMAN, MOES_HUMAN, S10A6_HUMAN, PEBP1_HUMAN, EZRI_HUMAN	39	697	12782	2.82132	0.998772	0.310898	47.1035
GOTERM_CC_FAT	GO:0009898~internal side of plasma membrane	4	9.30233	0.0669219	MOES_HUMAN, LSP1_HUMAN, PEBP1_HUMAN, EZRI_HUMAN	39	316	12782	4.14865	0.999771	0.356683	54.9017
GOTERM_CC_FAT	GO:0045177~apical part of cell	3	6.97674	0.0988388	MOES_HUMAN, PEBP1_HUMAN, EZRI_HUMAN	39	179	12782	5.49291	0.999997	0.450995	69.7738
GOTERM_CC_FAT	GO:0005856~cytoskeleton	7	16.2791	0.222728	NPM_HUMAN, VIME_HUMAN, MOES_HUMAN, LSP1_HUMAN, DHX9_HUMAN, PEBP1_HUMAN, EZRI_HUMAN	39	1381	12782	1.66126	1	0.69044	94.4796
GOTERM_MF_FAT	GO:0003779~actin binding	3	6.97674	0.265845	MOES_HUMAN, LSP1_HUMAN, EZRI_HUMAN	41	326	12983	2.91404	1	0.93666	97.1949
GOTERM_BP_FAT	GO:0006928~cell motion	3	6.97674	0.400011	VIME_HUMAN, MOES_HUMAN, LSP1_HUMAN	40	475	13528	2.136	1	0.992275	99.9328
GOTERM_MF_FAT	GO:0008092~cytoskeletal protein binding	3	6.97674	0.463549	MOES_HUMAN, LSP1_HUMAN, EZRI_HUMAN	41	504	12983	1.88487	1	0.992292	99.9255
SP_PIR_KEYWORDS	cell membrane	5	11.6279	0.721125	MOES_HUMAN, LSP1_HUMAN, S10A6_HUMAN, PEBP1_HUMAN, EZRI_HUMAN	43	2194	19235	1.01943	1	0.992133	100
GOTERM_CC_FAT	GO:0044459~plasma membrane part	6	13.9535	0.80825	MOES_HUMAN, LSP1_HUMAN, HNRPM_HUMAN, PEBP1_HUMAN, PHB_HUMAN, EZRI_HUMAN	39	2203	12782	0.892629	1	0.996117	100
GOTERM_CC_FAT	GO:0005886~plasma membrane	7	16.2791	0.98426	VIME_HUMAN, MOES_HUMAN, LSP1_HUMAN, HNRPM_HUMAN, PEBP1_HUMAN, PHB_HUMAN, EZRI_HUMAN	39	3777	12782	0.607415	1	0.999997	100
SP_PIR_KEYWORDS	membrane	6	13.9535	0.999502	MOES_HUMAN, LSP1_HUMAN, S10A6_HUMAN, PEBP1_HUMAN, PHB_HUMAN, EZRI_HUMAN	43	6256	19235	0.429021	1	1	100
Annotation Cluster 19	Enrichment Score: 0.4967036324716008
Category	Term	Count	%	PValue	Genes	List Total	Pop Hits	Pop Total	Fold Enrichment	Bonferroni	Benjamini	FDR
GOTERM_CC_FAT	GO:0005815~microtubule organizing center	3	6.97674	0.17308	NPM_HUMAN, DHX9_HUMAN, EZRI_HUMAN	39	253	12782	3.88629	1	0.6164	88.751
GOTERM_CC_FAT	GO:0005856~cytoskeleton	7	16.2791	0.222728	NPM_HUMAN, VIME_HUMAN, MOES_HUMAN, LSP1_HUMAN, DHX9_HUMAN, PEBP1_HUMAN, EZRI_HUMAN	39	1381	12782	1.66126	1	0.69044	94.4796
GOTERM_CC_FAT	GO:0015630~microtubule cytoskeleton	3	6.97674	0.490102	NPM_HUMAN, DHX9_HUMAN, EZRI_HUMAN	39	549	12782	1.79095	1	0.921671	99.9566
GOTERM_CC_FAT	GO:0044430~cytoskeletal part	4	9.30233	0.545605	NPM_HUMAN, VIME_HUMAN, DHX9_HUMAN, EZRI_HUMAN	39	952	12782	1.37707	1	0.944547	99.9885
Annotation Cluster 20	Enrichment Score: 0.3724930104142618
Category	Term	Count	%	PValue	Genes	List Total	Pop Hits	Pop Total	Fold Enrichment	Bonferroni	Benjamini	FDR
SP_PIR_KEYWORDS	ATP	4	9.30233	0.014725	HNRPU_HUMAN, CH10_HUMAN, DHX9_HUMAN, ATIF1_HUMAN	43	236	19235	7.58179	0.852459	0.0912475	15.8456
SP_PIR_KEYWORDS	P-loop	3	6.97674	0.0265362	HNRPU_HUMAN, EF2_HUMAN, DHX9_HUMAN	43	116	19235	11.5688	0.968864	0.124919	26.8582
GOTERM_MF_FAT	GO:0017076~purine nucleotide binding	6	13.9535	0.724074	HNRPU_HUMAN, EF2_HUMAN, CH10_HUMAN, DHX9_HUMAN, PEBP1_HUMAN, ACADM_HUMAN	41	1918	12983	0.99059	1	0.999531	100
SP_PIR_KEYWORDS	nucleotide-binding	4	9.30233	0.724834	HNRPU_HUMAN, EF2_HUMAN, DHX9_HUMAN, PEBP1_HUMAN	43	1686	19235	1.06127	1	0.9914	100
GOTERM_MF_FAT	GO:0030554~adenyl nucleotide binding	5	11.6279	0.732796	HNRPU_HUMAN, CH10_HUMAN, DHX9_HUMAN, PEBP1_HUMAN, ACADM_HUMAN	41	1577	12983	1.00399	1	0.999446	100
GOTERM_MF_FAT	GO:0001883~purine nucleoside binding	5	11.6279	0.74407	HNRPU_HUMAN, CH10_HUMAN, DHX9_HUMAN, PEBP1_HUMAN, ACADM_HUMAN	41	1601	12983	0.98894	1	0.999393	100
GOTERM_MF_FAT	GO:0001882~nucleoside binding	5	11.6279	0.749121	HNRPU_HUMAN, CH10_HUMAN, DHX9_HUMAN, PEBP1_HUMAN, ACADM_HUMAN	41	1612	12983	0.982191	1	0.999255	100
SP_PIR_KEYWORDS	atp-binding	3	6.97674	0.795709	HNRPU_HUMAN, DHX9_HUMAN, PEBP1_HUMAN	43	1326	19235	1.01205	1	0.996624	100
GOTERM_MF_FAT	GO:0032553~ribonucleotide binding	5	11.6279	0.836725	HNRPU_HUMAN, EF2_HUMAN, CH10_HUMAN, DHX9_HUMAN, PEBP1_HUMAN	41	1836	12983	0.86236	1	0.999836	100
GOTERM_MF_FAT	GO:0032555~purine ribonucleotide binding	5	11.6279	0.836725	HNRPU_HUMAN, EF2_HUMAN, CH10_HUMAN, DHX9_HUMAN, PEBP1_HUMAN	41	1836	12983	0.86236	1	0.999836	100
GOTERM_MF_FAT	GO:0005524~ATP binding	4	9.30233	0.848901	HNRPU_HUMAN, CH10_HUMAN, DHX9_HUMAN, PEBP1_HUMAN	41	1477	12983	0.857572	1	0.999841	100
GOTERM_MF_FAT	GO:0032559~adenyl ribonucleotide binding	4	9.30233	0.855545	HNRPU_HUMAN, CH10_HUMAN, DHX9_HUMAN, PEBP1_HUMAN	41	1497	12983	0.846115	1	0.999823	100
Annotation Cluster 21	Enrichment Score: 0.28551594188177587
Category	Term	Count	%	PValue	Genes	List Total	Pop Hits	Pop Total	Fold Enrichment	Bonferroni	Benjamini	FDR
GOTERM_BP_FAT	GO:0042592~homeostatic process	4	9.30233	0.369166	RS14_HUMAN, NPM_HUMAN, TXND5_HUMAN, TRFL_HUMAN	40	751	13528	1.80133	1	0.991497	99.8624
GOTERM_BP_FAT	GO:0019725~cellular homeostasis	3	6.97674	0.390745	NPM_HUMAN, TXND5_HUMAN, TRFL_HUMAN	40	466	13528	2.17725	1	0.993385	99.9164
SP_PIR_KEYWORDS	disulfide bond	4	9.30233	0.964578	FETUA_HUMAN, NPM_HUMAN, TXND5_HUMAN, TRFL_HUMAN	43	2924	19235	0.611936	1	0.999984	100
Annotation Cluster 22	Enrichment Score: 0.2572352404139744
Category	Term	Count	%	PValue	Genes	List Total	Pop Hits	Pop Total	Fold Enrichment	Bonferroni	Benjamini	FDR
SP_PIR_KEYWORDS	calcium binding	3	6.97674	0.0212734	S10A4_HUMAN, S10A6_HUMAN, ANXA5_HUMAN	43	103	19235	13.0289	0.937581	0.109149	22.1252
SP_PIR_KEYWORDS	calcium	3	6.97674	0.528266	S10A4_HUMAN, S10A6_HUMAN, ANXA5_HUMAN	43	803	19235	1.6712	1	0.956131	99.984
GOTERM_MF_FAT	GO:0005509~calcium ion binding	3	6.97674	0.78578	S10A4_HUMAN, S10A6_HUMAN, ANXA5_HUMAN	41	919	12983	1.03371	1	0.999549	100
SP_PIR_KEYWORDS	metal-binding	3	6.97674	0.992514	MATR3_HUMAN, S10A6_HUMAN, TRFL_HUMAN	43	2972	19235	0.45154	1	1	100
GOTERM_MF_FAT	GO:0046914~transition metal ion binding	3	6.97674	0.999248	MATR3_HUMAN, S10A6_HUMAN, TRFL_HUMAN	41	2785	12983	0.341104	1	1	100
GOTERM_MF_FAT	GO:0046872~metal ion binding	5	11.6279	0.999747	MATR3_HUMAN, S10A4_HUMAN, S10A6_HUMAN, ANXA5_HUMAN, TRFL_HUMAN	41	4140	12983	0.382438	1	1	100
GOTERM_MF_FAT	GO:0043169~cation binding	5	11.6279	0.99978	MATR3_HUMAN, S10A4_HUMAN, S10A6_HUMAN, ANXA5_HUMAN, TRFL_HUMAN	41	4179	12983	0.378869	1	1	100
GOTERM_MF_FAT	GO:0043167~ion binding	5	11.6279	0.999824	MATR3_HUMAN, S10A4_HUMAN, S10A6_HUMAN, ANXA5_HUMAN, TRFL_HUMAN	41	4241	12983	0.37333	1	1	100
Annotation Cluster 23	Enrichment Score: 0.03437468022134994
Category	Term	Count	%	PValue	Genes	List Total	Pop Hits	Pop Total	Fold Enrichment	Bonferroni	Benjamini	FDR
GOTERM_CC_FAT	GO:0044459~plasma membrane part	6	13.9535	0.80825	MOES_HUMAN, LSP1_HUMAN, HNRPM_HUMAN, PEBP1_HUMAN, PHB_HUMAN, EZRI_HUMAN	39	2203	12782	0.892629	1	0.996117	100
GOTERM_CC_FAT	GO:0005887~integral to plasma membrane	3	6.97674	0.880215	HNRPM_HUMAN, PEBP1_HUMAN, PHB_HUMAN	39	1188	12782	0.827635	1	0.999031	100
GOTERM_CC_FAT	GO:0031226~intrinsic to plasma membrane	3	6.97674	0.888194	HNRPM_HUMAN, PEBP1_HUMAN, PHB_HUMAN	39	1215	12782	0.809243	1	0.999067	100
GOTERM_CC_FAT	GO:0005886~plasma membrane	7	16.2791	0.98426	VIME_HUMAN, MOES_HUMAN, LSP1_HUMAN, HNRPM_HUMAN, PEBP1_HUMAN, PHB_HUMAN, EZRI_HUMAN	39	3777	12782	0.607415	1	0.999997	100
GOTERM_CC_FAT	GO:0016021~integral to membrane	3	6.97674	1	HNRPM_HUMAN, PEBP1_HUMAN, PHB_HUMAN	39	5297	12782	0.18562	1	1	100
GOTERM_CC_FAT	GO:0031224~intrinsic to membrane	3	6.97674	1	HNRPM_HUMAN, PEBP1_HUMAN, PHB_HUMAN	39	5485	12782	0.179258	1	1	100
Annotation Cluster 24	Enrichment Score: 0.006105426083653154
Category	Term	Count	%	PValue	Genes	List Total	Pop Hits	Pop Total	Fold Enrichment	Bonferroni	Benjamini	FDR
SP_PIR_KEYWORDS	disulfide bond	4	9.30233	0.964578	FETUA_HUMAN, NPM_HUMAN, TXND5_HUMAN, TRFL_HUMAN	43	2924	19235	0.611936	1	0.999984	100
SP_PIR_KEYWORDS	signal	4	9.30233	0.981102	FETUA_HUMAN, TXND5_HUMAN, GANAB_HUMAN, TRFL_HUMAN	43	3250	19235	0.550555	1	0.999997	100
UP_SEQ_FEATURE	signal peptide	4	9.30233	0.981863	FETUA_HUMAN, TXND5_HUMAN, GANAB_HUMAN, TRFL_HUMAN	43	3250	19113	0.547063	1	1	100
UP_SEQ_FEATURE	disulfide bond	3	6.97674	0.989902	FETUA_HUMAN, TXND5_HUMAN, TRFL_HUMAN	43	2819	19113	0.473028	1	1	100
UP_SEQ_FEATURE	glycosylation site:N-linked (GlcNAc...)	3	6.97674	0.999547	FETUA_HUMAN, GANAB_HUMAN, TRFL_HUMAN	43	4129	19113	0.322951	1	1	100
SP_PIR_KEYWORDS	glycoprotein	3	6.97674	0.9997	FETUA_HUMAN, GANAB_HUMAN, TRFL_HUMAN	43	4318	19235	0.310787	1	1	100
DAVID options:

## Sheet: Table S2a
Table S2a. Quantified parameters for the 36 CLL patient cohort
The most recurrent diagnostic parameters in CLL are the mutational status of the B-cell receptor and the expression of the ZAP70 protein.
Mutational status and ZAP70 expression were measured during clinical diagnosis.
Mutationonal status is expressed as % DNA sequence homology compared to germline sequence.
ZAP70 expression was quantified seperately by flow cytometry during clinical diagnosis.
Unmutated (UM) B-cell recepetor and high ZAP70 expression predict poor clinical outcome.
UM: unmutated CLL
M: Mutated CLL		+/-: ZAP positive or ZAP negative
ZAP: ZAP70 expression level
%VH: mutational status of the B-cell receptor.
%CD5CD19: % CLL B-cells in the sample (combined CD5CD19 expression is a CLL B-cell marker)
%CD33: myeloid cell fraction
%CD66b: granulocyte cell fraction
PI: Propidium Iodide staining for quantitation of dead cells
AnV: Annexin V staining for quantitation of apoptotic cells
%cH2A: percentage of histone H2A that is cleaved at V114 as seen by our AQUA screening tool (Figure 1 and supplementary figure 3)
			Measured by Flow cytometry						Measured by AQUA
Diagnosed:	ZAP	% VH	%CD5CD19	%CD33	%CD66b	%PI	% AnV		%cH2A
UM+1	95.2	100	75.4	0.5	2.1	54.9	86.3		19.7
UM+2	94.3	100	93	0.5	1.8	79.5	41.4		6.7
UM+3	94.1	98.9	84.8	1.5	1.6	54.4	53.9		3.2
UM+4	93.8	100	75.5	1	2	29.9	57.4		13.7
UM+5	91.8	100	71.9	0.3	1.7	13.4	82.8		9.1
UM+6	86.1	100	64.5	0.4	3.7	46.1	88.4		5.3
UM+7	84.9	99.3	74.9	0.9	0.8	5.9	94.6		3.3
UM+8	83.7	100	61.3	0.9	1.3	7.6	77.5		13.2
UM+9	81.7	100	38.7	4.3	6.4	51.9	94		14.3
UM+10	54.2	100	76.4	1.1	5.7	84.7	99.6		11.3
UM+11	53	100	77.63	0.6	0.9	22.5	71.85		4.6
M-1	8.9	91.6	72.4	0.7	1.6	71.5	87.9		12.1
M-2	9.8	95.1	91.5	0.1	2	73.8	75.2		38.5
M-3	7.93	87.85	71.8	2.2	3.3	42	90.2		14.2
M-4	8.3	92.2	94.8	0.7	1.8	11.6	69.9		17.5
M-5	7.5	92	70.3	0.8	8.6	31.9	86.5		33.2
M-6	7.9	96.2	74.8	1.5	4.6	20.3	93.6		2.9
M-7	7.5	95.1	82	2	3.6	30	93.9		3.2
M-8	8.91	92.98	65.6	5.7	2.6	24.5	83.8		13.2
M-9	8.06	93.06	63	1.4	1.1	6.5	87.2		17.6
M-10	7.74	93.75	80.6	1.8	14.1	6.5	86.2		67
M-11	8.7	93.7	88.5	0.9	0.1	23.2	68.7		0.7
M-12	7.9	93.47	66	1.9	1.9	6.2	97.2		3.5
M-13	8.9	93.3	55.2	2	5	13	77.6		21.1
M-14	7.3	94	61.1	4.7	1.9	46	78.8		6.4
M+1	92.7	94	78.8	0.5	6.4	67.2	64.6		43.3
M+2	97.3	95.4	91.4	1.2	3.3	21.5	54.6		10.7
M+3	80.3	92.98	70.5	0.7	6.1	38.8	85.4		19.4
M+4	77.9	94.21	66.3	3.6	2.5	37.9	96		9.7
M+5	99.8	96.2	81.5	2.5	1.1	31.9	86.1		2.9
UM-1	9.8	98.6	82.2	1	0.8	49.4	61		6.9
UM-2	9.8	100	82.7	1.9	3.5	20.7	36.4		3.4
UM-3	7.6	100	72.9	0.4	1.6	19.3			9.5
UM-4	7.5	99.6	75.4	3.1	2.9	16.3	86.2		8.8
UM-5	7.5	100	69.7	0.4	2.9	24.5	90.8		6.6
UM-6	9.8	100	57.7	0.4	2.1	13.2	93.3		13.9

## Sheet: Table S2b
Table S2b. Spearman's Rho correlation between all different markers measured in the cohort of 36 differentially diagnosed CLL patients
Green filling indicates that H2A clipping is significantly correlated with Granulocyte contamination,
suggesting that H2Asp is in fact a myeloid enzyme and is not correlated to any known disease markers
cH2A was determined by the AQUA approach that was optimized for this patient cohort screening
		%cH2A	ZAP70	Mutation	%CD5CD19	%CD33	%CD66	%PI	%AnnexinV
cH2A	CC	1000	0.001	−0.303	−0.208	−0.176	0.439**	0.078	−0.014
	Sig.	.	0.998	0.072	0.224	0.303	0.007	0.651	0.936
ZAP70	CC		1000	0.402*	0.237	−0.222	−0.161	0.313	−0.256
	Sig.		.	0.015	0.164	0.193	0.347	0.063	0.132
Mutation	CC			1000	0.039	−0.331*	−0.120	0.061	−0.116
	Sig.			.	0.821	0.048	0.484	0.722	0.501
%CD5CD19	CC				1000	−0.189	−0.202	0.219	−0.512**
	Sig.				.	0.269	0.238	0.199	0.001
%CD33	CC					1000	0.183	−0.107	0.228
	Sig.					.	0.285	0.533	0.182
%CD66	CC						1000	0.175	0.291
	Sig.						.	0.307	0.086
%PI	CC							1000	−0.067
	Sig.							.	0.697
%AnnexinV	CC								1000
	Sig.								.
**. Correlation is significant at the 0.01 level (2-tailed).
*. Correlation is significant at the 0.05 level (2-tailed).
